# Supplementary material
Source: publisher figshare collection journal article supplement (https://asha.figshare.com/articles/dataset/_/23721345)
Supplement: Supplementary file 1 [file 1]

## Sheet: Sheet 1 - ROR_table
Supplemental material, Fusaroli et al., "Identifying Medications Underlying Communication Atypicalities in Psychotic and Affective Disorders: A Pharmacovigilance Study Within the FDA Adverse Event Reporting System," JSLHR, https://doi.org/10.1044/2023_JSLHR-22-00739
Supplemental Material S2. Reporting odds ratios.
ROR_table
	ATC code	Substance	ATC level 3	adverse_event	ROR_nonNeuropsychiatric	ROR_affective	ROR_psychotic
1	A01AA01	sodium fluoride	Stomatological preparations	aphasia	[4]	NA	NA
2	A01AA01	sodium fluoride	Stomatological preparations	high productivity speech or thought	[0]	NA	NA
3	A01AA01	sodium fluoride	Stomatological preparations	incoherence	[2]	NA	NA
4	A01AA01	sodium fluoride	Stomatological preparations	low productivity speech or thought	[0]	NA	NA
5	A01AA01	sodium fluoride	Stomatological preparations	motor control or execution	[0]	NA	NA
6	A01AA01	sodium fluoride	Stomatological preparations	phonatory	3.81 (2.31-5.91) [20]*	NA	NA
7	A01AA01	sodium fluoride	Stomatological preparations	prosody	[0]	NA	NA
8	A01AA01	sodium fluoride	Stomatological preparations	reasoning abnormal	[0]	NA	NA
9	A01AA01	sodium fluoride	Stomatological preparations	stereotypies	[0]	NA	NA
10	A02AA01	magnesium carbonate	Antacids	aphasia	[7]	[2]	[0]
11	A02AA01	magnesium carbonate	Antacids	high productivity speech or thought	[1]	[2]	[0]
12	A02AA01	magnesium carbonate	Antacids	incoherence	[2]	[0]	[3]
13	A02AA01	magnesium carbonate	Antacids	low productivity speech or thought	[0]	[0]	[0]
14	A02AA01	magnesium carbonate	Antacids	motor control or execution	[3]	[1]	[9]
15	A02AA01	magnesium carbonate	Antacids	phonatory	1.16 (0.63-1.95) [14]	[4]	[2]
16	A02AA01	magnesium carbonate	Antacids	prosody	[0]	[0]	[0]
17	A02AA01	magnesium carbonate	Antacids	reasoning abnormal	[0]	[0]	[0]
18	A02AA01	magnesium carbonate	Antacids	stereotypies	[0]	[0]	[0]
19	A02AA02	magnesium oxide	Antacids	aphasia	1.29 (0.81-1.93) [23]	[5]	[1]
20	A02AA02	magnesium oxide	Antacids	high productivity speech or thought	[2]	1.17 (0.58-2.12) [11]	[0]
21	A02AA02	magnesium oxide	Antacids	incoherence	[5]	[9]	[7]
22	A02AA02	magnesium oxide	Antacids	low productivity speech or thought	[5]	[2]	[2]
23	A02AA02	magnesium oxide	Antacids	motor control or execution	1.93 (1.36-2.67) [37]	1.39 (0.88-2.1) [23]	[5]
24	A02AA02	magnesium oxide	Antacids	phonatory	1.38 (1.08-1.74) [72]	1.48 (0.76-2.6) [12]	[1]
25	A02AA02	magnesium oxide	Antacids	prosody	[0]	[0]	[0]
26	A02AA02	magnesium oxide	Antacids	reasoning abnormal	[0]	[0]	[0]
27	A02AA02	magnesium oxide	Antacids	stereotypies	[0]	[0]	[0]
28	A02AB01	aluminium hydroxide	Antacids	aphasia	[6]	[1]	[0]
29	A02AB01	aluminium hydroxide	Antacids	high productivity speech or thought	[1]	[2]	[0]
30	A02AB01	aluminium hydroxide	Antacids	incoherence	[0]	[1]	[3]
31	A02AB01	aluminium hydroxide	Antacids	low productivity speech or thought	[0]	[0]	[0]
32	A02AB01	aluminium hydroxide	Antacids	motor control or execution	[5]	[2]	4.58 (2.15-8.63) [10]
33	A02AB01	aluminium hydroxide	Antacids	phonatory	2.12 (1.31-3.25) [21]	[3]	[2]
34	A02AB01	aluminium hydroxide	Antacids	prosody	[0]	[0]	[0]
35	A02AB01	aluminium hydroxide	Antacids	reasoning abnormal	[0]	[0]	[0]
36	A02AB01	aluminium hydroxide	Antacids	stereotypies	[0]	[0]	[0]
37	A02AC01	calcium carbonate	Antacids	aphasia	1.3 (0.99-1.67) [62]	0.82 (0.47-1.35) [16]	[1]
38	A02AC01	calcium carbonate	Antacids	high productivity speech or thought	[5]	0.54 (0.27-0.94) [12]	[3]
39	A02AC01	calcium carbonate	Antacids	incoherence	1.18 (0.82-1.66) [34]	0.24 (0.11-0.45) [10]	[4]
40	A02AC01	calcium carbonate	Antacids	low productivity speech or thought	[7]	[6]	[0]
41	A02AC01	calcium carbonate	Antacids	motor control or execution	2.32 (1.91-2.78) [118]*	1.13 (0.81-1.52) [44]	[6]
42	A02AC01	calcium carbonate	Antacids	phonatory	1.34 (1.15-1.54) [186]	0.83 (0.47-1.36) [16]	[3]
43	A02AC01	calcium carbonate	Antacids	prosody	[0]	[0]	[0]
44	A02AC01	calcium carbonate	Antacids	reasoning abnormal	[1]	[1]	[2]
45	A02AC01	calcium carbonate	Antacids	stereotypies	[1]	[2]	[1]
46	A02BA01	cimetidine	Drugs for peptic ulcer and reflux	aphasia	[4]	[0]	NA
47	A02BA01	cimetidine	Drugs for peptic ulcer and reflux	high productivity speech or thought	[0]	[3]	NA
48	A02BA01	cimetidine	Drugs for peptic ulcer and reflux	incoherence	[3]	[0]	NA
49	A02BA01	cimetidine	Drugs for peptic ulcer and reflux	low productivity speech or thought	[0]	[0]	NA
50	A02BA01	cimetidine	Drugs for peptic ulcer and reflux	motor control or execution	[9]	[3]	NA
51	A02BA01	cimetidine	Drugs for peptic ulcer and reflux	phonatory	1.11 (0.6-1.86) [14]	[3]	NA
52	A02BA01	cimetidine	Drugs for peptic ulcer and reflux	prosody	[0]	[0]	NA
53	A02BA01	cimetidine	Drugs for peptic ulcer and reflux	reasoning abnormal	[0]	[0]	NA
54	A02BA01	cimetidine	Drugs for peptic ulcer and reflux	stereotypies	[0]	[0]	NA
55	A02BA02	ranitidine	Drugs for peptic ulcer and reflux	aphasia	0.55 (0.42-0.71) [60]	0.42 (0.2-0.79) [10]	[2]
56	A02BA02	ranitidine	Drugs for peptic ulcer and reflux	high productivity speech or thought	1.3 (0.71-2.2) [14]	0.64 (0.37-1.03) [17]	[2]
57	A02BA02	ranitidine	Drugs for peptic ulcer and reflux	incoherence	0.72 (0.53-0.96) [47]	0.65 (0.44-0.92) [31]	1.44 (0.71-2.6) [11]
58	A02BA02	ranitidine	Drugs for peptic ulcer and reflux	low productivity speech or thought	[2]	[5]	[1]
59	A02BA02	ranitidine	Drugs for peptic ulcer and reflux	motor control or execution	0.62 (0.49-0.79) [73]	0.63 (0.42-0.91) [30]	[7]
60	A02BA02	ranitidine	Drugs for peptic ulcer and reflux	phonatory	0.88 (0.78-0.99) [279]	1.73 (1.22-2.39) [39]	[4]
61	A02BA02	ranitidine	Drugs for peptic ulcer and reflux	prosody	[0]	[0]	[0]
62	A02BA02	ranitidine	Drugs for peptic ulcer and reflux	reasoning abnormal	[0]	[0]	[0]
63	A02BA02	ranitidine	Drugs for peptic ulcer and reflux	stereotypies	[1]	[0]	[0]
64	A02BA03	famotidine	Drugs for peptic ulcer and reflux	aphasia	0.67 (0.41-1.02) [21]	[8]	[1]
65	A02BA03	famotidine	Drugs for peptic ulcer and reflux	high productivity speech or thought	[4]	[5]	[1]
66	A02BA03	famotidine	Drugs for peptic ulcer and reflux	incoherence	0.58 (0.29-1.04) [11]	0.47 (0.24-0.82) [12]	[3]
67	A02BA03	famotidine	Drugs for peptic ulcer and reflux	low productivity speech or thought	[3]	[4]	[0]
68	A02BA03	famotidine	Drugs for peptic ulcer and reflux	motor control or execution	1.67 (1.26-2.17) [56]	1.12 (0.74-1.63) [28]	[1]
69	A02BA03	famotidine	Drugs for peptic ulcer and reflux	phonatory	1.21 (1-1.46) [111]	0.98 (0.5-1.72) [12]	[4]
70	A02BA03	famotidine	Drugs for peptic ulcer and reflux	prosody	[0]	[0]	[0]
71	A02BA03	famotidine	Drugs for peptic ulcer and reflux	reasoning abnormal	[0]	[0]	[0]
72	A02BA03	famotidine	Drugs for peptic ulcer and reflux	stereotypies	[2]	[0]	[0]
73	A02BA04	nizatidine	Drugs for peptic ulcer and reflux	aphasia	[3]	NA	NA
74	A02BA04	nizatidine	Drugs for peptic ulcer and reflux	high productivity speech or thought	[1]	NA	NA
75	A02BA04	nizatidine	Drugs for peptic ulcer and reflux	incoherence	[1]	NA	NA
76	A02BA04	nizatidine	Drugs for peptic ulcer and reflux	low productivity speech or thought	[0]	NA	NA
77	A02BA04	nizatidine	Drugs for peptic ulcer and reflux	motor control or execution	[5]	NA	NA
78	A02BA04	nizatidine	Drugs for peptic ulcer and reflux	phonatory	[1]	NA	NA
79	A02BA04	nizatidine	Drugs for peptic ulcer and reflux	prosody	[0]	NA	NA
80	A02BA04	nizatidine	Drugs for peptic ulcer and reflux	reasoning abnormal	[0]	NA	NA
81	A02BA04	nizatidine	Drugs for peptic ulcer and reflux	stereotypies	[0]	NA	NA
82	A02BC01	omeprazole	Drugs for peptic ulcer and reflux	aphasia	1.11 (0.94-1.3) [158]	1.39 (1.12-1.71) [98]	5.15 (3.61-7.17) [41]*
83	A02BC01	omeprazole	Drugs for peptic ulcer and reflux	high productivity speech or thought	1.2 (0.69-1.93) [17]	0.6 (0.44-0.79) [51]	1.29 (0.66-2.3) [12]
84	A02BC01	omeprazole	Drugs for peptic ulcer and reflux	incoherence	1.16 (0.94-1.41) [99]	0.67 (0.54-0.82) [102]	1.6 (1.12-2.21) [39]
85	A02BC01	omeprazole	Drugs for peptic ulcer and reflux	low productivity speech or thought	1.5 (1.01-2.15) [30]	0.71 (0.46-1.05) [27]	[3]
86	A02BC01	omeprazole	Drugs for peptic ulcer and reflux	motor control or execution	0.97 (0.82-1.14) [149]	0.82 (0.67-0.98) [121]	1.4 (1.01-1.89) [45]
87	A02BC01	omeprazole	Drugs for peptic ulcer and reflux	phonatory	1.9 (1.77-2.04) [778]*	2.12 (1.77-2.54) [142]*	2.82 (1.54-4.78) [15]
88	A02BC01	omeprazole	Drugs for peptic ulcer and reflux	prosody	[0]	[0]	[0]
89	A02BC01	omeprazole	Drugs for peptic ulcer and reflux	reasoning abnormal	[1]	[3]	[2]
90	A02BC01	omeprazole	Drugs for peptic ulcer and reflux	stereotypies	[3]	[2]	[5]
91	A02BC02	pantoprazole	Drugs for peptic ulcer and reflux	aphasia	1.62 (1.36-1.92) [138]*	0.97 (0.7-1.3) [46]	[8]
92	A02BC02	pantoprazole	Drugs for peptic ulcer and reflux	high productivity speech or thought	1.29 (0.64-2.32) [11]	0.37 (0.23-0.58) [21]	[4]
93	A02BC02	pantoprazole	Drugs for peptic ulcer and reflux	incoherence	0.79 (0.57-1.08) [41]	0.42 (0.3-0.57) [42]	0.73 (0.36-1.31) [11]
94	A02BC02	pantoprazole	Drugs for peptic ulcer and reflux	low productivity speech or thought	0.82 (0.39-1.53) [10]	0.69 (0.39-1.11) [17]	[1]
95	A02BC02	pantoprazole	Drugs for peptic ulcer and reflux	motor control or execution	1.05 (0.85-1.29) [97]	0.7 (0.54-0.89) [68]	1.5 (0.99-2.17) [29]
96	A02BC02	pantoprazole	Drugs for peptic ulcer and reflux	phonatory	1.48 (1.33-1.64) [367]*	1.48 (1.14-1.89) [68]	[7]
97	A02BC02	pantoprazole	Drugs for peptic ulcer and reflux	prosody	[0]	[0]	[0]
98	A02BC02	pantoprazole	Drugs for peptic ulcer and reflux	reasoning abnormal	[0]	[1]	[1]
99	A02BC02	pantoprazole	Drugs for peptic ulcer and reflux	stereotypies	[1]	[0]	[1]
100	A02BC03	lansoprazole	Drugs for peptic ulcer and reflux	aphasia	1.09 (0.84-1.4) [65]	0.47 (0.25-0.81) [13]	[3]
101	A02BC03	lansoprazole	Drugs for peptic ulcer and reflux	high productivity speech or thought	1.69 (0.81-3.13) [10]	0.6 (0.36-0.95) [19]	[4]
102	A02BC03	lansoprazole	Drugs for peptic ulcer and reflux	incoherence	1.23 (0.89-1.66) [44]	0.63 (0.44-0.88) [36]	[9]
103	A02BC03	lansoprazole	Drugs for peptic ulcer and reflux	low productivity speech or thought	1.19 (0.57-2.2) [10]	1.07 (0.59-1.78) [15]	[0]
104	A02BC03	lansoprazole	Drugs for peptic ulcer and reflux	motor control or execution	1.3 (1.04-1.62) [83]	0.88 (0.65-1.18) [49]	1.36 (0.83-2.1) [21]
105	A02BC03	lansoprazole	Drugs for peptic ulcer and reflux	phonatory	0.99 (0.85-1.15) [172]	1.04 (0.68-1.51) [28]	[4]
106	A02BC03	lansoprazole	Drugs for peptic ulcer and reflux	prosody	[0]	[0]	[0]
107	A02BC03	lansoprazole	Drugs for peptic ulcer and reflux	reasoning abnormal	[1]	[0]	[1]
108	A02BC03	lansoprazole	Drugs for peptic ulcer and reflux	stereotypies	[1]	[1]	[3]
109	A02BC04	rabeprazole	Drugs for peptic ulcer and reflux	aphasia	0.99 (0.58-1.59) [17]	[9]	NA
110	A02BC04	rabeprazole	Drugs for peptic ulcer and reflux	high productivity speech or thought	[3]	[2]	NA
111	A02BC04	rabeprazole	Drugs for peptic ulcer and reflux	incoherence	1.27 (0.67-2.17) [13]	0.82 (0.42-1.44) [12]	NA
112	A02BC04	rabeprazole	Drugs for peptic ulcer and reflux	low productivity speech or thought	[2]	[4]	NA
113	A02BC04	rabeprazole	Drugs for peptic ulcer and reflux	motor control or execution	1.97 (1.38-2.73) [36]	1.32 (0.79-2.08) [19]	NA
114	A02BC04	rabeprazole	Drugs for peptic ulcer and reflux	phonatory	1.51 (1.18-1.89) [75]	1.85 (0.98-3.19) [13]	NA
115	A02BC04	rabeprazole	Drugs for peptic ulcer and reflux	prosody	[0]	[0]	NA
116	A02BC04	rabeprazole	Drugs for peptic ulcer and reflux	reasoning abnormal	[0]	[0]	NA
117	A02BC04	rabeprazole	Drugs for peptic ulcer and reflux	stereotypies	[0]	[0]	NA
118	A02BC05	esomeprazole	Drugs for peptic ulcer and reflux	aphasia	0.74 (0.58-0.92) [78]	0.88 (0.62-1.22) [38]	[2]
119	A02BC05	esomeprazole	Drugs for peptic ulcer and reflux	high productivity speech or thought	[6]	0.75 (0.52-1.04) [37]	[7]
120	A02BC05	esomeprazole	Drugs for peptic ulcer and reflux	incoherence	0.87 (0.65-1.13) [55]	0.73 (0.56-0.94) [65]	[8]
121	A02BC05	esomeprazole	Drugs for peptic ulcer and reflux	low productivity speech or thought	0.94 (0.51-1.59) [14]	0.81 (0.47-1.29) [18]	[1]
122	A02BC05	esomeprazole	Drugs for peptic ulcer and reflux	motor control or execution	0.76 (0.6-0.94) [86]	0.63 (0.48-0.83) [56]	[7]
123	A02BC05	esomeprazole	Drugs for peptic ulcer and reflux	phonatory	2.6 (2.42-2.8) [781]*	2.14 (1.7-2.67) [87]*	6.17 (3.02-11.33) [11]*
124	A02BC05	esomeprazole	Drugs for peptic ulcer and reflux	prosody	[0]	[0]	[0]
125	A02BC05	esomeprazole	Drugs for peptic ulcer and reflux	reasoning abnormal	[0]	[0]	[0]
126	A02BC05	esomeprazole	Drugs for peptic ulcer and reflux	stereotypies	[6]	[7]	[5]
127	A02BC06	dexlansoprazole	Drugs for peptic ulcer and reflux	aphasia	[5]	[2]	NA
128	A02BC06	dexlansoprazole	Drugs for peptic ulcer and reflux	high productivity speech or thought	[0]	[2]	NA
129	A02BC06	dexlansoprazole	Drugs for peptic ulcer and reflux	incoherence	[1]	[3]	NA
130	A02BC06	dexlansoprazole	Drugs for peptic ulcer and reflux	low productivity speech or thought	[2]	[0]	NA
131	A02BC06	dexlansoprazole	Drugs for peptic ulcer and reflux	motor control or execution	[5]	[2]	NA
132	A02BC06	dexlansoprazole	Drugs for peptic ulcer and reflux	phonatory	2.71 (2.15-3.36) [84]*	[5]	NA
133	A02BC06	dexlansoprazole	Drugs for peptic ulcer and reflux	prosody	[0]	[0]	NA
134	A02BC06	dexlansoprazole	Drugs for peptic ulcer and reflux	reasoning abnormal	[0]	[0]	NA
135	A02BC06	dexlansoprazole	Drugs for peptic ulcer and reflux	stereotypies	[0]	[0]	NA
136	A02BX02	sucralfate	Drugs for peptic ulcer and reflux	aphasia	[5]	[2]	NA
137	A02BX02	sucralfate	Drugs for peptic ulcer and reflux	high productivity speech or thought	[0]	[3]	NA
138	A02BX02	sucralfate	Drugs for peptic ulcer and reflux	incoherence	[4]	[6]	NA
139	A02BX02	sucralfate	Drugs for peptic ulcer and reflux	low productivity speech or thought	[2]	[0]	NA
140	A02BX02	sucralfate	Drugs for peptic ulcer and reflux	motor control or execution	[5]	1.33 (0.66-2.39) [11]	NA
141	A02BX02	sucralfate	Drugs for peptic ulcer and reflux	phonatory	1.85 (1.23-2.66) [29]	[7]	NA
142	A02BX02	sucralfate	Drugs for peptic ulcer and reflux	prosody	[0]	[0]	NA
143	A02BX02	sucralfate	Drugs for peptic ulcer and reflux	reasoning abnormal	[0]	[0]	NA
144	A02BX02	sucralfate	Drugs for peptic ulcer and reflux	stereotypies	[0]	[0]	NA
145	A02BX13	alginic acid	Drugs for peptic ulcer and reflux	aphasia	[2]	NA	NA
146	A02BX13	alginic acid	Drugs for peptic ulcer and reflux	high productivity speech or thought	[1]	NA	NA
147	A02BX13	alginic acid	Drugs for peptic ulcer and reflux	incoherence	[0]	NA	NA
148	A02BX13	alginic acid	Drugs for peptic ulcer and reflux	low productivity speech or thought	[0]	NA	NA
149	A02BX13	alginic acid	Drugs for peptic ulcer and reflux	motor control or execution	[3]	NA	NA
150	A02BX13	alginic acid	Drugs for peptic ulcer and reflux	phonatory	[4]	NA	NA
151	A02BX13	alginic acid	Drugs for peptic ulcer and reflux	prosody	[0]	NA	NA
152	A02BX13	alginic acid	Drugs for peptic ulcer and reflux	reasoning abnormal	[0]	NA	NA
153	A02BX13	alginic acid	Drugs for peptic ulcer and reflux	stereotypies	[0]	NA	NA
154	A02BX14	rebamipide	Drugs for peptic ulcer and reflux	aphasia	[9]	NA	NA
155	A02BX14	rebamipide	Drugs for peptic ulcer and reflux	high productivity speech or thought	[1]	NA	NA
156	A02BX14	rebamipide	Drugs for peptic ulcer and reflux	incoherence	[1]	NA	NA
157	A02BX14	rebamipide	Drugs for peptic ulcer and reflux	low productivity speech or thought	[0]	NA	NA
158	A02BX14	rebamipide	Drugs for peptic ulcer and reflux	motor control or execution	4.2 (2.92-5.86) [35]*	NA	NA
159	A02BX14	rebamipide	Drugs for peptic ulcer and reflux	phonatory	0.92 (0.57-1.41) [21]	NA	NA
160	A02BX14	rebamipide	Drugs for peptic ulcer and reflux	prosody	[0]	NA	NA
161	A02BX14	rebamipide	Drugs for peptic ulcer and reflux	reasoning abnormal	[0]	NA	NA
162	A02BX14	rebamipide	Drugs for peptic ulcer and reflux	stereotypies	[0]	NA	NA
163	A03AA05	trimebutine	Drugs for functional gastrointestinal disorders	aphasia	[5]	NA	NA
164	A03AA05	trimebutine	Drugs for functional gastrointestinal disorders	high productivity speech or thought	[0]	NA	NA
165	A03AA05	trimebutine	Drugs for functional gastrointestinal disorders	incoherence	[0]	NA	NA
166	A03AA05	trimebutine	Drugs for functional gastrointestinal disorders	low productivity speech or thought	[0]	NA	NA
167	A03AA05	trimebutine	Drugs for functional gastrointestinal disorders	motor control or execution	[3]	NA	NA
168	A03AA05	trimebutine	Drugs for functional gastrointestinal disorders	phonatory	[1]	NA	NA
169	A03AA05	trimebutine	Drugs for functional gastrointestinal disorders	prosody	[0]	NA	NA
170	A03AA05	trimebutine	Drugs for functional gastrointestinal disorders	reasoning abnormal	[0]	NA	NA
171	A03AA05	trimebutine	Drugs for functional gastrointestinal disorders	stereotypies	[0]	NA	NA
172	A03AA07	dicycloverine	Drugs for functional gastrointestinal disorders	aphasia	[3]	[7]	NA
173	A03AA07	dicycloverine	Drugs for functional gastrointestinal disorders	high productivity speech or thought	[2]	[7]	NA
174	A03AA07	dicycloverine	Drugs for functional gastrointestinal disorders	incoherence	[7]	[8]	NA
175	A03AA07	dicycloverine	Drugs for functional gastrointestinal disorders	low productivity speech or thought	[0]	[2]	NA
176	A03AA07	dicycloverine	Drugs for functional gastrointestinal disorders	motor control or execution	[6]	0.86 (0.42-1.55) [11]	NA
177	A03AA07	dicycloverine	Drugs for functional gastrointestinal disorders	phonatory	1.85 (1.15-2.81) [22]	[8]	NA
178	A03AA07	dicycloverine	Drugs for functional gastrointestinal disorders	prosody	[0]	[0]	NA
179	A03AA07	dicycloverine	Drugs for functional gastrointestinal disorders	reasoning abnormal	[0]	[0]	NA
180	A03AA07	dicycloverine	Drugs for functional gastrointestinal disorders	stereotypies	[0]	[0]	NA
181	A03AX12	phloroglucinol	Drugs for functional gastrointestinal disorders	aphasia	[0]	NA	NA
182	A03AX12	phloroglucinol	Drugs for functional gastrointestinal disorders	high productivity speech or thought	[0]	NA	NA
183	A03AX12	phloroglucinol	Drugs for functional gastrointestinal disorders	incoherence	[0]	NA	NA
184	A03AX12	phloroglucinol	Drugs for functional gastrointestinal disorders	low productivity speech or thought	[0]	NA	NA
185	A03AX12	phloroglucinol	Drugs for functional gastrointestinal disorders	motor control or execution	[1]	NA	NA
186	A03AX12	phloroglucinol	Drugs for functional gastrointestinal disorders	phonatory	[3]	NA	NA
187	A03AX12	phloroglucinol	Drugs for functional gastrointestinal disorders	prosody	[0]	NA	NA
188	A03AX12	phloroglucinol	Drugs for functional gastrointestinal disorders	reasoning abnormal	[0]	NA	NA
189	A03AX12	phloroglucinol	Drugs for functional gastrointestinal disorders	stereotypies	[0]	NA	NA
190	A03BA01	atropine	Belladonna	aphasia	3.19 (2.06-4.73) [25]*	[2]	[0]
191	A03BA01	atropine	Belladonna	high productivity speech or thought	[1]	[6]	[2]
192	A03BA01	atropine	Belladonna	incoherence	[8]	[7]	[7]
193	A03BA01	atropine	Belladonna	low productivity speech or thought	[1]	[2]	[0]
194	A03BA01	atropine	Belladonna	motor control or execution	6.36 (4.75-8.34) [53]*	[5]	[9]
195	A03BA01	atropine	Belladonna	phonatory	1.88 (1.36-2.54) [43]	[7]	[1]
196	A03BA01	atropine	Belladonna	prosody	[0]	[0]	[3]
197	A03BA01	atropine	Belladonna	reasoning abnormal	[0]	[0]	[0]
198	A03BA01	atropine	Belladonna	stereotypies	[1]	[1]	[0]
199	A03BA03	hyoscyamine	Belladonna	aphasia	[5]	[0]	NA
200	A03BA03	hyoscyamine	Belladonna	high productivity speech or thought	[0]	[3]	NA
201	A03BA03	hyoscyamine	Belladonna	incoherence	[2]	[6]	NA
202	A03BA03	hyoscyamine	Belladonna	low productivity speech or thought	[0]	[0]	NA
203	A03BA03	hyoscyamine	Belladonna	motor control or execution	11.11 (7.16-16.46) [25]*	[4]	NA
204	A03BA03	hyoscyamine	Belladonna	phonatory	1.77 (0.88-3.18) [11]	[5]	NA
205	A03BA03	hyoscyamine	Belladonna	prosody	[0]	[0]	NA
206	A03BA03	hyoscyamine	Belladonna	reasoning abnormal	[0]	[0]	NA
207	A03BA03	hyoscyamine	Belladonna	stereotypies	[1]	[1]	NA
208	A03FA01	metoclopramide	Propulsives	aphasia	1.46 (1.06-1.94) [46]	1.29 (0.7-2.18) [14]	NA
209	A03FA01	metoclopramide	Propulsives	high productivity speech or thought	[6]	0.88 (0.44-1.59) [11]	NA
210	A03FA01	metoclopramide	Propulsives	incoherence	1.26 (0.81-1.88) [24]	0.44 (0.21-0.82) [10]	NA
211	A03FA01	metoclopramide	Propulsives	low productivity speech or thought	[6]	[4]	NA
212	A03FA01	metoclopramide	Propulsives	motor control or execution	1.98 (1.53-2.52) [67]*	0.72 (0.41-1.18) [16]	NA
213	A03FA01	metoclopramide	Propulsives	phonatory	0.96 (0.77-1.18) [89]	1.3 (0.71-2.2) [14]	NA
214	A03FA01	metoclopramide	Propulsives	prosody	[0]	[0]	NA
215	A03FA01	metoclopramide	Propulsives	reasoning abnormal	[0]	[0]	NA
216	A03FA01	metoclopramide	Propulsives	stereotypies	[1]	[1]	NA
217	A03FA03	domperidone	Propulsives	aphasia	2.41 (1.28-4.13) [13]	9.52 (6.59-13.35) [36]*	59.9 (38.61-90.01) [30]*
218	A03FA03	domperidone	Propulsives	high productivity speech or thought	[0]	[5]	[0]
219	A03FA03	domperidone	Propulsives	incoherence	[1]	[8]	[3]
220	A03FA03	domperidone	Propulsives	low productivity speech or thought	[1]	[5]	[0]
221	A03FA03	domperidone	Propulsives	motor control or execution	[7]	[7]	[0]
222	A03FA03	domperidone	Propulsives	phonatory	2.17 (1.5-3.04) [34]	[6]	[0]
223	A03FA03	domperidone	Propulsives	prosody	[0]	[0]	[0]
224	A03FA03	domperidone	Propulsives	reasoning abnormal	[0]	[0]	[1]
225	A03FA03	domperidone	Propulsives	stereotypies	[0]	[0]	[0]
226	A03FA05	alizapride	Propulsives	aphasia	[5]	NA	NA
227	A03FA05	alizapride	Propulsives	high productivity speech or thought	[0]	NA	NA
228	A03FA05	alizapride	Propulsives	incoherence	[0]	NA	NA
229	A03FA05	alizapride	Propulsives	low productivity speech or thought	[0]	NA	NA
230	A03FA05	alizapride	Propulsives	motor control or execution	[4]	NA	NA
231	A03FA05	alizapride	Propulsives	phonatory	[2]	NA	NA
232	A03FA05	alizapride	Propulsives	prosody	[0]	NA	NA
233	A03FA05	alizapride	Propulsives	reasoning abnormal	[0]	NA	NA
234	A03FA05	alizapride	Propulsives	stereotypies	[0]	NA	NA
235	A03FA09	mosapride	Propulsives	aphasia	[4]	NA	NA
236	A03FA09	mosapride	Propulsives	high productivity speech or thought	[0]	NA	NA
237	A03FA09	mosapride	Propulsives	incoherence	[0]	NA	NA
238	A03FA09	mosapride	Propulsives	low productivity speech or thought	[1]	NA	NA
239	A03FA09	mosapride	Propulsives	motor control or execution	4.06 (1.94-7.49) [10]	NA	NA
240	A03FA09	mosapride	Propulsives	phonatory	[5]	NA	NA
241	A03FA09	mosapride	Propulsives	prosody	[0]	NA	NA
242	A03FA09	mosapride	Propulsives	reasoning abnormal	[0]	NA	NA
243	A03FA09	mosapride	Propulsives	stereotypies	[0]	NA	NA
244	A04AA01	ondansetron	Antiemetics and antinauseants	aphasia	2.42 (1.95-2.97) [93]*	0.77 (0.41-1.29) [14]	NA
245	A04AA01	ondansetron	Antiemetics and antinauseants	high productivity speech or thought	[2]	[5]	NA
246	A04AA01	ondansetron	Antiemetics and antinauseants	incoherence	0.9 (0.55-1.38) [21]	0.42 (0.24-0.69) [16]	NA
247	A04AA01	ondansetron	Antiemetics and antinauseants	low productivity speech or thought	[9]	1.07 (0.51-1.99) [10]	NA
248	A04AA01	ondansetron	Antiemetics and antinauseants	motor control or execution	2.64 (2.17-3.2) [109]*	0.67 (0.43-1) [25]	NA
249	A04AA01	ondansetron	Antiemetics and antinauseants	phonatory	1.46 (1.25-1.71) [165]	1.4 (0.9-2.08) [25]	NA
250	A04AA01	ondansetron	Antiemetics and antinauseants	prosody	[0]	[0]	NA
251	A04AA01	ondansetron	Antiemetics and antinauseants	reasoning abnormal	[3]	[0]	NA
252	A04AA01	ondansetron	Antiemetics and antinauseants	stereotypies	[2]	[0]	NA
253	A04AA02	granisetron	Antiemetics and antinauseants	aphasia	[9]	NA	NA
254	A04AA02	granisetron	Antiemetics and antinauseants	high productivity speech or thought	[0]	NA	NA
255	A04AA02	granisetron	Antiemetics and antinauseants	incoherence	[5]	NA	NA
256	A04AA02	granisetron	Antiemetics and antinauseants	low productivity speech or thought	[0]	NA	NA
257	A04AA02	granisetron	Antiemetics and antinauseants	motor control or execution	2.16 (1.37-3.25) [23]	NA	NA
258	A04AA02	granisetron	Antiemetics and antinauseants	phonatory	1.66 (1.22-2.21) [48]	NA	NA
259	A04AA02	granisetron	Antiemetics and antinauseants	prosody	[0]	NA	NA
260	A04AA02	granisetron	Antiemetics and antinauseants	reasoning abnormal	[1]	NA	NA
261	A04AA02	granisetron	Antiemetics and antinauseants	stereotypies	[0]	NA	NA
262	A04AA05	palonosetron	Antiemetics and antinauseants	aphasia	[9]	NA	NA
263	A04AA05	palonosetron	Antiemetics and antinauseants	high productivity speech or thought	[0]	NA	NA
264	A04AA05	palonosetron	Antiemetics and antinauseants	incoherence	[0]	NA	NA
265	A04AA05	palonosetron	Antiemetics and antinauseants	low productivity speech or thought	[2]	NA	NA
266	A04AA05	palonosetron	Antiemetics and antinauseants	motor control or execution	4.69 (3.2-6.64) [32]*	NA	NA
267	A04AA05	palonosetron	Antiemetics and antinauseants	phonatory	2.64 (1.95-3.5) [49]*	NA	NA
268	A04AA05	palonosetron	Antiemetics and antinauseants	prosody	[0]	NA	NA
269	A04AA05	palonosetron	Antiemetics and antinauseants	reasoning abnormal	[0]	NA	NA
270	A04AA05	palonosetron	Antiemetics and antinauseants	stereotypies	[0]	NA	NA
271	A04AD10	dronabinol	Antiemetics and antinauseants	aphasia	[4]	NA	NA
272	A04AD10	dronabinol	Antiemetics and antinauseants	high productivity speech or thought	[1]	NA	NA
273	A04AD10	dronabinol	Antiemetics and antinauseants	incoherence	[0]	NA	NA
274	A04AD10	dronabinol	Antiemetics and antinauseants	low productivity speech or thought	[0]	NA	NA
275	A04AD10	dronabinol	Antiemetics and antinauseants	motor control or execution	[3]	NA	NA
276	A04AD10	dronabinol	Antiemetics and antinauseants	phonatory	[6]	NA	NA
277	A04AD10	dronabinol	Antiemetics and antinauseants	prosody	[0]	NA	NA
278	A04AD10	dronabinol	Antiemetics and antinauseants	reasoning abnormal	[0]	NA	NA
279	A04AD10	dronabinol	Antiemetics and antinauseants	stereotypies	[0]	NA	NA
280	A04AD12	aprepitant	Antiemetics and antinauseants	aphasia	1.59 (0.86-2.67) [14]	NA	NA
281	A04AD12	aprepitant	Antiemetics and antinauseants	high productivity speech or thought	[0]	NA	NA
282	A04AD12	aprepitant	Antiemetics and antinauseants	incoherence	[2]	NA	NA
283	A04AD12	aprepitant	Antiemetics and antinauseants	low productivity speech or thought	[2]	NA	NA
284	A04AD12	aprepitant	Antiemetics and antinauseants	motor control or execution	2.01 (1.21-3.14) [19]	NA	NA
285	A04AD12	aprepitant	Antiemetics and antinauseants	phonatory	1.12 (0.75-1.62) [29]	NA	NA
286	A04AD12	aprepitant	Antiemetics and antinauseants	prosody	[0]	NA	NA
287	A04AD12	aprepitant	Antiemetics and antinauseants	reasoning abnormal	[0]	NA	NA
288	A04AD12	aprepitant	Antiemetics and antinauseants	stereotypies	[3]	NA	NA
289	A05AA02	ursodeoxycholic acid	Bile therapy	aphasia	0.95 (0.55-1.53) [17]	[1]	NA
290	A05AA02	ursodeoxycholic acid	Bile therapy	high productivity speech or thought	[1]	[1]	NA
291	A05AA02	ursodeoxycholic acid	Bile therapy	incoherence	[7]	[1]	NA
292	A05AA02	ursodeoxycholic acid	Bile therapy	low productivity speech or thought	[5]	[0]	NA
293	A05AA02	ursodeoxycholic acid	Bile therapy	motor control or execution	1.36 (0.89-2) [26]	[2]	NA
294	A05AA02	ursodeoxycholic acid	Bile therapy	phonatory	1.1 (0.83-1.43) [57]	[2]	NA
295	A05AA02	ursodeoxycholic acid	Bile therapy	prosody	[0]	[0]	NA
296	A05AA02	ursodeoxycholic acid	Bile therapy	reasoning abnormal	[0]	[0]	NA
297	A05AA02	ursodeoxycholic acid	Bile therapy	stereotypies	[0]	[0]	NA
298	A05AA04	obeticholic acid	Bile therapy	aphasia	[2]	NA	NA
299	A05AA04	obeticholic acid	Bile therapy	high productivity speech or thought	[0]	NA	NA
300	A05AA04	obeticholic acid	Bile therapy	incoherence	[6]	NA	NA
301	A05AA04	obeticholic acid	Bile therapy	low productivity speech or thought	[1]	NA	NA
302	A05AA04	obeticholic acid	Bile therapy	motor control or execution	[1]	NA	NA
303	A05AA04	obeticholic acid	Bile therapy	phonatory	[6]	NA	NA
304	A05AA04	obeticholic acid	Bile therapy	prosody	[0]	NA	NA
305	A05AA04	obeticholic acid	Bile therapy	reasoning abnormal	[0]	NA	NA
306	A05AA04	obeticholic acid	Bile therapy	stereotypies	[0]	NA	NA
307	A06AA02	docusate	Drugs for constipation	aphasia	1.19 (0.61-2.09) [12]	1.09 (0.59-1.84) [14]	[5]
308	A06AA02	docusate	Drugs for constipation	high productivity speech or thought	[0]	0.68 (0.32-1.25) [10]	[4]
309	A06AA02	docusate	Drugs for constipation	incoherence	[4]	0.64 (0.37-1.03) [17]	0.74 (0.36-1.34) [11]
310	A06AA02	docusate	Drugs for constipation	low productivity speech or thought	[1]	[1]	[0]
311	A06AA02	docusate	Drugs for constipation	motor control or execution	1.48 (0.84-2.41) [16]	1.28 (0.87-1.81) [33]	1.3 (0.84-1.94) [25]
312	A06AA02	docusate	Drugs for constipation	phonatory	1.54 (1.12-2.06) [45]	1.58 (0.96-2.46) [20]	[9]
313	A06AA02	docusate	Drugs for constipation	prosody	[0]	[0]	[0]
314	A06AA02	docusate	Drugs for constipation	reasoning abnormal	[0]	[4]	[2]
315	A06AA02	docusate	Drugs for constipation	stereotypies	[0]	[1]	[5]
316	A06AB02	bisacodyl	Drugs for constipation	aphasia	[5]	[3]	NA
317	A06AB02	bisacodyl	Drugs for constipation	high productivity speech or thought	[0]	[0]	NA
318	A06AB02	bisacodyl	Drugs for constipation	incoherence	[2]	[5]	NA
319	A06AB02	bisacodyl	Drugs for constipation	low productivity speech or thought	[0]	[0]	NA
320	A06AB02	bisacodyl	Drugs for constipation	motor control or execution	[4]	[7]	NA
321	A06AB02	bisacodyl	Drugs for constipation	phonatory	[8]	[3]	NA
322	A06AB02	bisacodyl	Drugs for constipation	prosody	[0]	[0]	NA
323	A06AB02	bisacodyl	Drugs for constipation	reasoning abnormal	[0]	[0]	NA
324	A06AB02	bisacodyl	Drugs for constipation	stereotypies	[0]	[0]	NA
325	A06AB06	sennosides	Drugs for constipation	aphasia	1.8 (1.03-2.93) [16]	[9]	[5]
326	A06AB06	sennosides	Drugs for constipation	high productivity speech or thought	[1]	0.94 (0.45-1.75) [10]	[5]
327	A06AB06	sennosides	Drugs for constipation	incoherence	1.87 (0.89-3.45) [10]	[4]	[8]
328	A06AB06	sennosides	Drugs for constipation	low productivity speech or thought	[2]	[3]	[1]
329	A06AB06	sennosides	Drugs for constipation	motor control or execution	5.07 (3.73-6.74) [48]*	1.73 (1.18-2.46) [32]	1.07 (0.66-1.65) [21]
330	A06AB06	sennosides	Drugs for constipation	phonatory	1.27 (0.87-1.79) [33]	1.09 (0.52-2.02) [10]	[5]
331	A06AB06	sennosides	Drugs for constipation	prosody	[0]	[0]	[0]
332	A06AB06	sennosides	Drugs for constipation	reasoning abnormal	[0]	[2]	[1]
333	A06AB06	sennosides	Drugs for constipation	stereotypies	[0]	[0]	[0]
334	A06AB08	sodium picosulfate	Drugs for constipation	aphasia	[4]	[2]	NA
335	A06AB08	sodium picosulfate	Drugs for constipation	high productivity speech or thought	[0]	[3]	NA
336	A06AB08	sodium picosulfate	Drugs for constipation	incoherence	[1]	[0]	NA
337	A06AB08	sodium picosulfate	Drugs for constipation	low productivity speech or thought	[0]	[0]	NA
338	A06AB08	sodium picosulfate	Drugs for constipation	motor control or execution	[5]	[7]	NA
339	A06AB08	sodium picosulfate	Drugs for constipation	phonatory	[7]	[3]	NA
340	A06AB08	sodium picosulfate	Drugs for constipation	prosody	[0]	[0]	NA
341	A06AB08	sodium picosulfate	Drugs for constipation	reasoning abnormal	[0]	[0]	NA
342	A06AB08	sodium picosulfate	Drugs for constipation	stereotypies	[0]	[0]	NA
343	A06AC01	psyllium	Drugs for constipation	aphasia	[2]	[1]	NA
344	A06AC01	psyllium	Drugs for constipation	high productivity speech or thought	[0]	[0]	NA
345	A06AC01	psyllium	Drugs for constipation	incoherence	[0]	[3]	NA
346	A06AC01	psyllium	Drugs for constipation	low productivity speech or thought	[0]	[0]	NA
347	A06AC01	psyllium	Drugs for constipation	motor control or execution	[1]	[4]	NA
348	A06AC01	psyllium	Drugs for constipation	phonatory	1.85 (1.01-3.11) [14]	[4]	NA
349	A06AC01	psyllium	Drugs for constipation	prosody	[0]	[0]	NA
350	A06AC01	psyllium	Drugs for constipation	reasoning abnormal	[0]	[0]	NA
351	A06AC01	psyllium	Drugs for constipation	stereotypies	[0]	[0]	NA
352	A06AC06	methylcellulose	Drugs for constipation	aphasia	NA	[1]	NA
353	A06AC06	methylcellulose	Drugs for constipation	high productivity speech or thought	NA	[1]	NA
354	A06AC06	methylcellulose	Drugs for constipation	incoherence	NA	[2]	NA
355	A06AC06	methylcellulose	Drugs for constipation	low productivity speech or thought	NA	[0]	NA
356	A06AC06	methylcellulose	Drugs for constipation	motor control or execution	NA	[2]	NA
357	A06AC06	methylcellulose	Drugs for constipation	phonatory	NA	[1]	NA
358	A06AC06	methylcellulose	Drugs for constipation	prosody	NA	[0]	NA
359	A06AC06	methylcellulose	Drugs for constipation	reasoning abnormal	NA	[0]	NA
360	A06AC06	methylcellulose	Drugs for constipation	stereotypies	NA	[0]	NA
361	A06AD11	lactulose	Drugs for constipation	aphasia	2.24 (1.34-3.51) [19]	[8]	[1]
362	A06AD11	lactulose	Drugs for constipation	high productivity speech or thought	[1]	[3]	[2]
363	A06AD11	lactulose	Drugs for constipation	incoherence	2.75 (1.5-4.62) [14]	[5]	1.23 (0.61-2.22) [11]
364	A06AD11	lactulose	Drugs for constipation	low productivity speech or thought	[0]	[1]	[1]
365	A06AD11	lactulose	Drugs for constipation	motor control or execution	3.97 (2.78-5.51) [36]*	1.41 (0.84-2.22) [19]	0.84 (0.4-1.57) [10]
366	A06AD11	lactulose	Drugs for constipation	phonatory	1.17 (0.78-1.68) [29]	[9]	[5]
367	A06AD11	lactulose	Drugs for constipation	prosody	[0]	[0]	[0]
368	A06AD11	lactulose	Drugs for constipation	reasoning abnormal	[0]	[1]	[1]
369	A06AD11	lactulose	Drugs for constipation	stereotypies	[2]	[0]	[0]
370	A06AD13	sodium sulfate	Drugs for constipation	aphasia	[9]	NA	NA
371	A06AD13	sodium sulfate	Drugs for constipation	high productivity speech or thought	[1]	NA	NA
372	A06AD13	sodium sulfate	Drugs for constipation	incoherence	[6]	NA	NA
373	A06AD13	sodium sulfate	Drugs for constipation	low productivity speech or thought	[1]	NA	NA
374	A06AD13	sodium sulfate	Drugs for constipation	motor control or execution	[8]	NA	NA
375	A06AD13	sodium sulfate	Drugs for constipation	phonatory	1.24 (0.79-1.84) [24]	NA	NA
376	A06AD13	sodium sulfate	Drugs for constipation	prosody	[0]	NA	NA
377	A06AD13	sodium sulfate	Drugs for constipation	reasoning abnormal	[0]	NA	NA
378	A06AD13	sodium sulfate	Drugs for constipation	stereotypies	[0]	NA	NA
379	A06AD15	macrogol	Drugs for constipation	aphasia	0.72 (0.5-1) [36]	0.97 (0.52-1.63) [14]	3.07 (1.61-5.35) [13]
380	A06AD15	macrogol	Drugs for constipation	high productivity speech or thought	[8]	[6]	[0]
381	A06AD15	macrogol	Drugs for constipation	incoherence	1.01 (0.68-1.44) [30]	0.63 (0.38-1) [19]	0.9 (0.44-1.62) [11]
382	A06AD15	macrogol	Drugs for constipation	low productivity speech or thought	[5]	1.63 (0.83-2.87) [12]	[1]
383	A06AD15	macrogol	Drugs for constipation	motor control or execution	0.92 (0.68-1.22) [49]	0.85 (0.55-1.26) [25]	1.72 (1.12-2.53) [27]
384	A06AD15	macrogol	Drugs for constipation	phonatory	0.49 (0.38-0.61) [71]	1.05 (0.58-1.74) [15]	[7]
385	A06AD15	macrogol	Drugs for constipation	prosody	[0]	[0]	[0]
386	A06AD15	macrogol	Drugs for constipation	reasoning abnormal	[0]	[1]	[0]
387	A06AD15	macrogol	Drugs for constipation	stereotypies	[2]	[3]	[2]
388	A06AG04	glycerol	Drugs for constipation	aphasia	[1]	NA	NA
389	A06AG04	glycerol	Drugs for constipation	high productivity speech or thought	[2]	NA	NA
390	A06AG04	glycerol	Drugs for constipation	incoherence	[1]	NA	NA
391	A06AG04	glycerol	Drugs for constipation	low productivity speech or thought	[0]	NA	NA
392	A06AG04	glycerol	Drugs for constipation	motor control or execution	[1]	NA	NA
393	A06AG04	glycerol	Drugs for constipation	phonatory	[6]	NA	NA
394	A06AG04	glycerol	Drugs for constipation	prosody	[0]	NA	NA
395	A06AG04	glycerol	Drugs for constipation	reasoning abnormal	[0]	NA	NA
396	A06AG04	glycerol	Drugs for constipation	stereotypies	[0]	NA	NA
397	A06AH04	naloxone	Drugs for constipation	aphasia	NA	[7]	[0]
398	A06AH04	naloxone	Drugs for constipation	high productivity speech or thought	NA	[6]	[0]
399	A06AH04	naloxone	Drugs for constipation	incoherence	NA	[7]	[3]
400	A06AH04	naloxone	Drugs for constipation	low productivity speech or thought	NA	[8]	[2]
401	A06AH04	naloxone	Drugs for constipation	motor control or execution	NA	[9]	[3]
402	A06AH04	naloxone	Drugs for constipation	phonatory	NA	[5]	[0]
403	A06AH04	naloxone	Drugs for constipation	prosody	NA	[0]	[0]
404	A06AH04	naloxone	Drugs for constipation	reasoning abnormal	NA	[0]	[1]
405	A06AH04	naloxone	Drugs for constipation	stereotypies	NA	[1]	[0]
406	A06AX03	lubiprostone	Drugs for constipation	aphasia	[2]	[0]	NA
407	A06AX03	lubiprostone	Drugs for constipation	high productivity speech or thought	[0]	[0]	NA
408	A06AX03	lubiprostone	Drugs for constipation	incoherence	[1]	[2]	NA
409	A06AX03	lubiprostone	Drugs for constipation	low productivity speech or thought	[0]	[0]	NA
410	A06AX03	lubiprostone	Drugs for constipation	motor control or execution	[1]	[2]	NA
411	A06AX03	lubiprostone	Drugs for constipation	phonatory	[7]	[4]	NA
412	A06AX03	lubiprostone	Drugs for constipation	prosody	[0]	[0]	NA
413	A06AX03	lubiprostone	Drugs for constipation	reasoning abnormal	[0]	[0]	NA
414	A06AX03	lubiprostone	Drugs for constipation	stereotypies	[0]	[0]	NA
415	A06AX04	linaclotide	Drugs for constipation	aphasia	[2]	[3]	NA
416	A06AX04	linaclotide	Drugs for constipation	high productivity speech or thought	[0]	[2]	NA
417	A06AX04	linaclotide	Drugs for constipation	incoherence	[2]	[2]	NA
418	A06AX04	linaclotide	Drugs for constipation	low productivity speech or thought	[0]	[0]	NA
419	A06AX04	linaclotide	Drugs for constipation	motor control or execution	[2]	[0]	NA
420	A06AX04	linaclotide	Drugs for constipation	phonatory	0.6 (0.34-0.97) [16]	[5]	NA
421	A06AX04	linaclotide	Drugs for constipation	prosody	[0]	[0]	NA
422	A06AX04	linaclotide	Drugs for constipation	reasoning abnormal	[0]	[0]	NA
423	A06AX04	linaclotide	Drugs for constipation	stereotypies	[0]	[0]	NA
424	A06AX06	tegaserod	Drugs for constipation	aphasia	3.69 (2.01-6.2) [14]	[1]	NA
425	A06AX06	tegaserod	Drugs for constipation	high productivity speech or thought	[1]	[1]	NA
426	A06AX06	tegaserod	Drugs for constipation	incoherence	[3]	[2]	NA
427	A06AX06	tegaserod	Drugs for constipation	low productivity speech or thought	[0]	[0]	NA
428	A06AX06	tegaserod	Drugs for constipation	motor control or execution	3.93 (2.24-6.4) [16]	[4]	NA
429	A06AX06	tegaserod	Drugs for constipation	phonatory	[3]	[2]	NA
430	A06AX06	tegaserod	Drugs for constipation	prosody	[0]	[0]	NA
431	A06AX06	tegaserod	Drugs for constipation	reasoning abnormal	[0]	[0]	NA
432	A06AX06	tegaserod	Drugs for constipation	stereotypies	[0]	[0]	NA
433	A07DA01	diphenoxylate	Antipropulsives	aphasia	[4]	[1]	NA
434	A07DA01	diphenoxylate	Antipropulsives	high productivity speech or thought	[0]	[4]	NA
435	A07DA01	diphenoxylate	Antipropulsives	incoherence	[6]	[5]	NA
436	A07DA01	diphenoxylate	Antipropulsives	low productivity speech or thought	[1]	[1]	NA
437	A07DA01	diphenoxylate	Antipropulsives	motor control or execution	2.63 (1.4-4.51) [13]	[4]	NA
438	A07DA01	diphenoxylate	Antipropulsives	phonatory	1.86 (1.2-2.76) [25]	[7]	NA
439	A07DA01	diphenoxylate	Antipropulsives	prosody	[0]	[0]	NA
440	A07DA01	diphenoxylate	Antipropulsives	reasoning abnormal	[0]	[0]	NA
441	A07DA01	diphenoxylate	Antipropulsives	stereotypies	[0]	[0]	NA
442	A07DA03	loperamide	Antipropulsives	aphasia	0.79 (0.49-1.19) [22]	[1]	[1]
443	A07DA03	loperamide	Antipropulsives	high productivity speech or thought	[1]	[2]	[1]
444	A07DA03	loperamide	Antipropulsives	incoherence	0.77 (0.41-1.33) [13]	[3]	[0]
445	A07DA03	loperamide	Antipropulsives	low productivity speech or thought	[3]	[3]	[1]
446	A07DA03	loperamide	Antipropulsives	motor control or execution	0.77 (0.48-1.15) [23]	[3]	[6]
447	A07DA03	loperamide	Antipropulsives	phonatory	1.04 (0.83-1.29) [85]	1.92 (1.04-3.24) [14]	[0]
448	A07DA03	loperamide	Antipropulsives	prosody	[0]	[0]	[0]
449	A07DA03	loperamide	Antipropulsives	reasoning abnormal	[0]	[0]	[0]
450	A07DA03	loperamide	Antipropulsives	stereotypies	[0]	[1]	[1]
451	A07EC01	sulfasalazine	Intestinal antiinflammatory agents	aphasia	0.59 (0.38-0.88) [24]	[3]	NA
452	A07EC01	sulfasalazine	Intestinal antiinflammatory agents	high productivity speech or thought	[3]	[0]	NA
453	A07EC01	sulfasalazine	Intestinal antiinflammatory agents	incoherence	[9]	[4]	NA
454	A07EC01	sulfasalazine	Intestinal antiinflammatory agents	low productivity speech or thought	[2]	[0]	NA
455	A07EC01	sulfasalazine	Intestinal antiinflammatory agents	motor control or execution	0.3 (0.15-0.51) [13]	[5]	NA
456	A07EC01	sulfasalazine	Intestinal antiinflammatory agents	phonatory	0.87 (0.71-1.06) [103]	[2]	NA
457	A07EC01	sulfasalazine	Intestinal antiinflammatory agents	prosody	[0]	[0]	NA
458	A07EC01	sulfasalazine	Intestinal antiinflammatory agents	reasoning abnormal	[0]	[0]	NA
459	A07EC01	sulfasalazine	Intestinal antiinflammatory agents	stereotypies	[1]	[0]	NA
460	A07EC02	mesalazine	Intestinal antiinflammatory agents	aphasia	0.49 (0.31-0.73) [23]	[4]	NA
461	A07EC02	mesalazine	Intestinal antiinflammatory agents	high productivity speech or thought	[6]	[4]	NA
462	A07EC02	mesalazine	Intestinal antiinflammatory agents	incoherence	0.78 (0.49-1.18) [22]	[5]	NA
463	A07EC02	mesalazine	Intestinal antiinflammatory agents	low productivity speech or thought	[4]	[1]	NA
464	A07EC02	mesalazine	Intestinal antiinflammatory agents	motor control or execution	0.49 (0.32-0.73) [25]	[4]	NA
465	A07EC02	mesalazine	Intestinal antiinflammatory agents	phonatory	0.7 (0.57-0.86) [96]	[9]	NA
466	A07EC02	mesalazine	Intestinal antiinflammatory agents	prosody	[0]	[0]	NA
467	A07EC02	mesalazine	Intestinal antiinflammatory agents	reasoning abnormal	[0]	[1]	NA
468	A07EC02	mesalazine	Intestinal antiinflammatory agents	stereotypies	[0]	[0]	NA
469	A08AA01	phentermine	Antiobesity	aphasia	[7]	[8]	NA
470	A08AA01	phentermine	Antiobesity	high productivity speech or thought	[2]	[3]	NA
471	A08AA01	phentermine	Antiobesity	incoherence	[6]	[3]	NA
472	A08AA01	phentermine	Antiobesity	low productivity speech or thought	[1]	[2]	NA
473	A08AA01	phentermine	Antiobesity	motor control or execution	[7]	[3]	NA
474	A08AA01	phentermine	Antiobesity	phonatory	[6]	[3]	NA
475	A08AA01	phentermine	Antiobesity	prosody	[0]	[0]	NA
476	A08AA01	phentermine	Antiobesity	reasoning abnormal	[0]	[0]	NA
477	A08AA01	phentermine	Antiobesity	stereotypies	[0]	[0]	NA
478	A08AA10	sibutramine	Antiobesity	aphasia	[7]	NA	NA
479	A08AA10	sibutramine	Antiobesity	high productivity speech or thought	[2]	NA	NA
480	A08AA10	sibutramine	Antiobesity	incoherence	[0]	NA	NA
481	A08AA10	sibutramine	Antiobesity	low productivity speech or thought	[0]	NA	NA
482	A08AA10	sibutramine	Antiobesity	motor control or execution	[0]	NA	NA
483	A08AA10	sibutramine	Antiobesity	phonatory	[4]	NA	NA
484	A08AA10	sibutramine	Antiobesity	prosody	[0]	NA	NA
485	A08AA10	sibutramine	Antiobesity	reasoning abnormal	[0]	NA	NA
486	A08AA10	sibutramine	Antiobesity	stereotypies	[0]	NA	NA
487	A08AA11	lorcaserin	Antiobesity	aphasia	[6]	NA	NA
488	A08AA11	lorcaserin	Antiobesity	high productivity speech or thought	[3]	NA	NA
489	A08AA11	lorcaserin	Antiobesity	incoherence	[5]	NA	NA
490	A08AA11	lorcaserin	Antiobesity	low productivity speech or thought	40.85 (23.67-65.71) [17]*	NA	NA
491	A08AA11	lorcaserin	Antiobesity	motor control or execution	[8]	NA	NA
492	A08AA11	lorcaserin	Antiobesity	phonatory	[4]	NA	NA
493	A08AA11	lorcaserin	Antiobesity	prosody	[0]	NA	NA
494	A08AA11	lorcaserin	Antiobesity	reasoning abnormal	[0]	NA	NA
495	A08AA11	lorcaserin	Antiobesity	stereotypies	[0]	NA	NA
496	A08AB01	orlistat	Antiobesity	aphasia	[5]	NA	NA
497	A08AB01	orlistat	Antiobesity	high productivity speech or thought	[2]	NA	NA
498	A08AB01	orlistat	Antiobesity	incoherence	[4]	NA	NA
499	A08AB01	orlistat	Antiobesity	low productivity speech or thought	[0]	NA	NA
500	A08AB01	orlistat	Antiobesity	motor control or execution	0.43 (0.21-0.8) [10]	NA	NA
501	A08AB01	orlistat	Antiobesity	phonatory	0.19 (0.09-0.33) [12]	NA	NA
502	A08AB01	orlistat	Antiobesity	prosody	[0]	NA	NA
503	A08AB01	orlistat	Antiobesity	reasoning abnormal	[0]	NA	NA
504	A08AB01	orlistat	Antiobesity	stereotypies	[0]	NA	NA
505	A09AA02	pancreatin	Digestives	aphasia	[7]	[2]	NA
506	A09AA02	pancreatin	Digestives	high productivity speech or thought	[2]	[0]	NA
507	A09AA02	pancreatin	Digestives	incoherence	[5]	[3]	NA
508	A09AA02	pancreatin	Digestives	low productivity speech or thought	[0]	[0]	NA
509	A09AA02	pancreatin	Digestives	motor control or execution	[7]	[2]	NA
510	A09AA02	pancreatin	Digestives	phonatory	1.42 (1.09-1.81) [65]	[3]	NA
511	A09AA02	pancreatin	Digestives	prosody	[0]	[0]	NA
512	A09AA02	pancreatin	Digestives	reasoning abnormal	[0]	[0]	NA
513	A09AA02	pancreatin	Digestives	stereotypies	[0]	[0]	NA
514	A09AB04	citric acid	Digestives	aphasia	[2]	NA	NA
515	A09AB04	citric acid	Digestives	high productivity speech or thought	[0]	NA	NA
516	A09AB04	citric acid	Digestives	incoherence	[0]	NA	NA
517	A09AB04	citric acid	Digestives	low productivity speech or thought	[0]	NA	NA
518	A09AB04	citric acid	Digestives	motor control or execution	[3]	NA	NA
519	A09AB04	citric acid	Digestives	phonatory	[5]	NA	NA
520	A09AB04	citric acid	Digestives	prosody	[0]	NA	NA
521	A09AB04	citric acid	Digestives	reasoning abnormal	[0]	NA	NA
522	A09AB04	citric acid	Digestives	stereotypies	[0]	NA	NA
523	A10AB04	insulin lispro	Insulins	aphasia	1.08 (0.88-1.32) [99]	[3]	NA
524	A10AB04	insulin lispro	Insulins	high productivity speech or thought	[4]	[2]	NA
525	A10AB04	insulin lispro	Insulins	incoherence	2.81 (2.38-3.3) [152]*	[8]	NA
526	A10AB04	insulin lispro	Insulins	low productivity speech or thought	2.19 (1.45-3.18) [28]	[2]	NA
527	A10AB04	insulin lispro	Insulins	motor control or execution	1.04 (0.84-1.26) [102]	0.81 (0.4-1.47) [11]	NA
528	A10AB04	insulin lispro	Insulins	phonatory	0.71 (0.61-0.82) [191]	[8]	NA
529	A10AB04	insulin lispro	Insulins	prosody	[0]	[0]	NA
530	A10AB04	insulin lispro	Insulins	reasoning abnormal	[3]	[0]	NA
531	A10AB04	insulin lispro	Insulins	stereotypies	[0]	[0]	NA
532	A10AB05	insulin aspart	Insulins	aphasia	0.87 (0.62-1.18) [40]	[3]	[1]
533	A10AB05	insulin aspart	Insulins	high productivity speech or thought	[4]	[2]	[1]
534	A10AB05	insulin aspart	Insulins	incoherence	1.67 (1.22-2.23) [46]	[8]	[1]
535	A10AB05	insulin aspart	Insulins	low productivity speech or thought	[6]	[5]	[1]
536	A10AB05	insulin aspart	Insulins	motor control or execution	1.05 (0.78-1.38) [52]	0.65 (0.31-1.21) [10]	[8]
537	A10AB05	insulin aspart	Insulins	phonatory	0.6 (0.47-0.74) [81]	[6]	[0]
538	A10AB05	insulin aspart	Insulins	prosody	[0]	[0]	[0]
539	A10AB05	insulin aspart	Insulins	reasoning abnormal	[2]	[0]	[0]
540	A10AB05	insulin aspart	Insulins	stereotypies	[0]	[0]	[0]
541	A10AB06	insulin glulisine	Insulins	aphasia	[7]	NA	NA
542	A10AB06	insulin glulisine	Insulins	high productivity speech or thought	[1]	NA	NA
543	A10AB06	insulin glulisine	Insulins	incoherence	[4]	NA	NA
544	A10AB06	insulin glulisine	Insulins	low productivity speech or thought	[1]	NA	NA
545	A10AB06	insulin glulisine	Insulins	motor control or execution	[6]	NA	NA
546	A10AB06	insulin glulisine	Insulins	phonatory	0.77 (0.45-1.24) [17]	NA	NA
547	A10AB06	insulin glulisine	Insulins	prosody	[0]	NA	NA
548	A10AB06	insulin glulisine	Insulins	reasoning abnormal	[0]	NA	NA
549	A10AB06	insulin glulisine	Insulins	stereotypies	[0]	NA	NA
550	A10AE04	insulin glargine	Insulins	aphasia	0.87 (0.71-1.06) [99]	1.36 (0.8-2.17) [18]	[3]
551	A10AE04	insulin glargine	Insulins	high productivity speech or thought	[4]	[6]	[1]
552	A10AE04	insulin glargine	Insulins	incoherence	1.6 (1.31-1.93) [108]	0.54 (0.3-0.9) [15]	[1]
553	A10AE04	insulin glargine	Insulins	low productivity speech or thought	1.57 (1.01-2.34) [25]	[6]	[2]
554	A10AE04	insulin glargine	Insulins	motor control or execution	1.03 (0.85-1.23) [125]	1.04 (0.69-1.52) [28]	[9]
555	A10AE04	insulin glargine	Insulins	phonatory	0.69 (0.61-0.79) [231]	1.22 (0.69-1.99) [16]	[1]
556	A10AE04	insulin glargine	Insulins	prosody	[0]	[0]	[0]
557	A10AE04	insulin glargine	Insulins	reasoning abnormal	[1]	[0]	[0]
558	A10AE04	insulin glargine	Insulins	stereotypies	[0]	[0]	[0]
559	A10AE05	insulin detemir	Insulins	aphasia	0.87 (0.54-1.32) [22]	[3]	NA
560	A10AE05	insulin detemir	Insulins	high productivity speech or thought	[1]	[0]	NA
561	A10AE05	insulin detemir	Insulins	incoherence	2.12 (1.45-3) [32]	[4]	NA
562	A10AE05	insulin detemir	Insulins	low productivity speech or thought	[3]	[1]	NA
563	A10AE05	insulin detemir	Insulins	motor control or execution	1.07 (0.71-1.54) [29]	[3]	NA
564	A10AE05	insulin detemir	Insulins	phonatory	0.73 (0.55-0.95) [54]	[1]	NA
565	A10AE05	insulin detemir	Insulins	prosody	[0]	[0]	NA
566	A10AE05	insulin detemir	Insulins	reasoning abnormal	[1]	[0]	NA
567	A10AE05	insulin detemir	Insulins	stereotypies	[0]	[0]	NA
568	A10AE06	insulin degludec	Insulins	aphasia	[6]	NA	NA
569	A10AE06	insulin degludec	Insulins	high productivity speech or thought	[0]	NA	NA
570	A10AE06	insulin degludec	Insulins	incoherence	[8]	NA	NA
571	A10AE06	insulin degludec	Insulins	low productivity speech or thought	[0]	NA	NA
572	A10AE06	insulin degludec	Insulins	motor control or execution	[9]	NA	NA
573	A10AE06	insulin degludec	Insulins	phonatory	0.46 (0.28-0.72) [19]	NA	NA
574	A10AE06	insulin degludec	Insulins	prosody	[0]	NA	NA
575	A10AE06	insulin degludec	Insulins	reasoning abnormal	[0]	NA	NA
576	A10AE06	insulin degludec	Insulins	stereotypies	[0]	NA	NA
577	A10BA02	metformin	Blood glucose lowering drugs	aphasia	0.87 (0.76-1) [222]	1.01 (0.75-1.33) [54]	1.54 (0.88-2.51) [17]
578	A10BA02	metformin	Blood glucose lowering drugs	high productivity speech or thought	[8]	0.69 (0.5-0.94) [43]	1.2 (0.64-2.04) [14]
579	A10BA02	metformin	Blood glucose lowering drugs	incoherence	0.95 (0.8-1.12) [144]	0.73 (0.57-0.91) [81]	1.05 (0.72-1.49) [33]
580	A10BA02	metformin	Blood glucose lowering drugs	low productivity speech or thought	1.07 (0.75-1.47) [38]	1.25 (0.86-1.77) [34]	1.22 (0.57-2.29) [10]
581	A10BA02	metformin	Blood glucose lowering drugs	motor control or execution	1.1 (0.98-1.24) [298]	0.98 (0.8-1.19) [106]	1.23 (0.9-1.64) [50]
582	A10BA02	metformin	Blood glucose lowering drugs	phonatory	0.84 (0.77-0.91) [621]	1.59 (1.26-2) [82]	1.44 (0.68-2.71) [10]
583	A10BA02	metformin	Blood glucose lowering drugs	prosody	[0]	[0]	[3]
584	A10BA02	metformin	Blood glucose lowering drugs	reasoning abnormal	[2]	[1]	[1]
585	A10BA02	metformin	Blood glucose lowering drugs	stereotypies	[2]	[3]	[2]
586	A10BB01	glibenclamide	Blood glucose lowering drugs	aphasia	1.32 (0.9-1.87) [32]	[6]	[2]
587	A10BB01	glibenclamide	Blood glucose lowering drugs	high productivity speech or thought	[0]	[5]	[2]
588	A10BB01	glibenclamide	Blood glucose lowering drugs	incoherence	1.3 (0.78-2.04) [19]	[4]	[1]
589	A10BB01	glibenclamide	Blood glucose lowering drugs	low productivity speech or thought	[4]	[1]	[1]
590	A10BB01	glibenclamide	Blood glucose lowering drugs	motor control or execution	2 (1.49-2.63) [52]	1.3 (0.69-2.24) [13]	[7]
591	A10BB01	glibenclamide	Blood glucose lowering drugs	phonatory	0.74 (0.56-0.98) [53]	2.47 (1.27-4.35) [12]	[0]
592	A10BB01	glibenclamide	Blood glucose lowering drugs	prosody	[0]	[0]	[0]
593	A10BB01	glibenclamide	Blood glucose lowering drugs	reasoning abnormal	[0]	[0]	[0]
594	A10BB01	glibenclamide	Blood glucose lowering drugs	stereotypies	[1]	[0]	[0]
595	A10BB07	glipizide	Blood glucose lowering drugs	aphasia	0.51 (0.29-0.81) [17]	[8]	[0]
596	A10BB07	glipizide	Blood glucose lowering drugs	high productivity speech or thought	[0]	[9]	[2]
597	A10BB07	glipizide	Blood glucose lowering drugs	incoherence	0.95 (0.57-1.48) [19]	0.83 (0.45-1.41) [14]	3.04 (1.5-5.53) [11]
598	A10BB07	glipizide	Blood glucose lowering drugs	low productivity speech or thought	[4]	[0]	[0]
599	A10BB07	glipizide	Blood glucose lowering drugs	motor control or execution	0.84 (0.56-1.2) [30]	0.85 (0.46-1.43) [14]	[8]
600	A10BB07	glipizide	Blood glucose lowering drugs	phonatory	0.85 (0.68-1.06) [83]	1.49 (0.76-2.63) [12]	[2]
601	A10BB07	glipizide	Blood glucose lowering drugs	prosody	[0]	[0]	[0]
602	A10BB07	glipizide	Blood glucose lowering drugs	reasoning abnormal	[0]	[0]	[0]
603	A10BB07	glipizide	Blood glucose lowering drugs	stereotypies	[0]	[0]	[1]
604	A10BB09	gliclazide	Blood glucose lowering drugs	aphasia	1.9 (1.21-2.83) [24]	[4]	[4]
605	A10BB09	gliclazide	Blood glucose lowering drugs	high productivity speech or thought	[4]	[1]	[1]
606	A10BB09	gliclazide	Blood glucose lowering drugs	incoherence	[7]	[4]	[1]
607	A10BB09	gliclazide	Blood glucose lowering drugs	low productivity speech or thought	[5]	[2]	[2]
608	A10BB09	gliclazide	Blood glucose lowering drugs	motor control or execution	1.84 (1.19-2.72) [25]	[3]	[8]
609	A10BB09	gliclazide	Blood glucose lowering drugs	phonatory	0.86 (0.59-1.22) [32]	2.97 (1.41-5.52) [10]	[0]
610	A10BB09	gliclazide	Blood glucose lowering drugs	prosody	[0]	[0]	[0]
611	A10BB09	gliclazide	Blood glucose lowering drugs	reasoning abnormal	[0]	[0]	[0]
612	A10BB09	gliclazide	Blood glucose lowering drugs	stereotypies	[1]	[0]	[0]
613	A10BB12	glimepiride	Blood glucose lowering drugs	aphasia	1.27 (0.93-1.69) [47]	[3]	[1]
614	A10BB12	glimepiride	Blood glucose lowering drugs	high productivity speech or thought	[2]	[2]	[3]
615	A10BB12	glimepiride	Blood glucose lowering drugs	incoherence	0.62 (0.34-1.05) [14]	[4]	[0]
616	A10BB12	glimepiride	Blood glucose lowering drugs	low productivity speech or thought	[5]	[4]	[1]
617	A10BB12	glimepiride	Blood glucose lowering drugs	motor control or execution	1.99 (1.57-2.49) [79]*	1.14 (0.64-1.9) [15]	[2]
618	A10BB12	glimepiride	Blood glucose lowering drugs	phonatory	0.79 (0.63-0.98) [86]	2.04 (1.08-3.51) [13]	[0]
619	A10BB12	glimepiride	Blood glucose lowering drugs	prosody	[0]	[0]	[0]
620	A10BB12	glimepiride	Blood glucose lowering drugs	reasoning abnormal	[1]	[0]	[0]
621	A10BB12	glimepiride	Blood glucose lowering drugs	stereotypies	[1]	[1]	[0]
622	A10BF01	acarbose	Blood glucose lowering drugs	aphasia	[7]	NA	NA
623	A10BF01	acarbose	Blood glucose lowering drugs	high productivity speech or thought	[0]	NA	NA
624	A10BF01	acarbose	Blood glucose lowering drugs	incoherence	[3]	NA	NA
625	A10BF01	acarbose	Blood glucose lowering drugs	low productivity speech or thought	[0]	NA	NA
626	A10BF01	acarbose	Blood glucose lowering drugs	motor control or execution	3.75 (2.18-6.03) [17]	NA	NA
627	A10BF01	acarbose	Blood glucose lowering drugs	phonatory	[2]	NA	NA
628	A10BF01	acarbose	Blood glucose lowering drugs	prosody	[0]	NA	NA
629	A10BF01	acarbose	Blood glucose lowering drugs	reasoning abnormal	[0]	NA	NA
630	A10BF01	acarbose	Blood glucose lowering drugs	stereotypies	[1]	NA	NA
631	A10BF02	miglitol	Blood glucose lowering drugs	aphasia	[0]	NA	NA
632	A10BF02	miglitol	Blood glucose lowering drugs	high productivity speech or thought	[0]	NA	NA
633	A10BF02	miglitol	Blood glucose lowering drugs	incoherence	[0]	NA	NA
634	A10BF02	miglitol	Blood glucose lowering drugs	low productivity speech or thought	[1]	NA	NA
635	A10BF02	miglitol	Blood glucose lowering drugs	motor control or execution	[6]	NA	NA
636	A10BF02	miglitol	Blood glucose lowering drugs	phonatory	[7]	NA	NA
637	A10BF02	miglitol	Blood glucose lowering drugs	prosody	[0]	NA	NA
638	A10BF02	miglitol	Blood glucose lowering drugs	reasoning abnormal	[0]	NA	NA
639	A10BF02	miglitol	Blood glucose lowering drugs	stereotypies	[0]	NA	NA
640	A10BF03	voglibose	Blood glucose lowering drugs	aphasia	[1]	NA	NA
641	A10BF03	voglibose	Blood glucose lowering drugs	high productivity speech or thought	[0]	NA	NA
642	A10BF03	voglibose	Blood glucose lowering drugs	incoherence	[0]	NA	NA
643	A10BF03	voglibose	Blood glucose lowering drugs	low productivity speech or thought	[1]	NA	NA
644	A10BF03	voglibose	Blood glucose lowering drugs	motor control or execution	[8]	NA	NA
645	A10BF03	voglibose	Blood glucose lowering drugs	phonatory	[5]	NA	NA
646	A10BF03	voglibose	Blood glucose lowering drugs	prosody	[0]	NA	NA
647	A10BF03	voglibose	Blood glucose lowering drugs	reasoning abnormal	[0]	NA	NA
648	A10BF03	voglibose	Blood glucose lowering drugs	stereotypies	[0]	NA	NA
649	A10BG02	rosiglitazone	Blood glucose lowering drugs	aphasia	0.76 (0.58-0.98) [59]	[0]	NA
650	A10BG02	rosiglitazone	Blood glucose lowering drugs	high productivity speech or thought	[0]	[1]	NA
651	A10BG02	rosiglitazone	Blood glucose lowering drugs	incoherence	0.23 (0.11-0.42) [11]	[4]	NA
652	A10BG02	rosiglitazone	Blood glucose lowering drugs	low productivity speech or thought	[4]	[0]	NA
653	A10BG02	rosiglitazone	Blood glucose lowering drugs	motor control or execution	0.5 (0.36-0.68) [42]	[9]	NA
654	A10BG02	rosiglitazone	Blood glucose lowering drugs	phonatory	0.11 (0.07-0.16) [26]	[3]	NA
655	A10BG02	rosiglitazone	Blood glucose lowering drugs	prosody	[0]	[0]	NA
656	A10BG02	rosiglitazone	Blood glucose lowering drugs	reasoning abnormal	[0]	[0]	NA
657	A10BG02	rosiglitazone	Blood glucose lowering drugs	stereotypies	[1]	[0]	NA
658	A10BG03	pioglitazone	Blood glucose lowering drugs	aphasia	[9]	[0]	[0]
659	A10BG03	pioglitazone	Blood glucose lowering drugs	high productivity speech or thought	[4]	[5]	[2]
660	A10BG03	pioglitazone	Blood glucose lowering drugs	incoherence	0.99 (0.59-1.55) [19]	[9]	[1]
661	A10BG03	pioglitazone	Blood glucose lowering drugs	low productivity speech or thought	[4]	[1]	[1]
662	A10BG03	pioglitazone	Blood glucose lowering drugs	motor control or execution	0.7 (0.45-1.04) [24]	[7]	[6]
663	A10BG03	pioglitazone	Blood glucose lowering drugs	phonatory	0.7 (0.54-0.89) [65]	[4]	[0]
664	A10BG03	pioglitazone	Blood glucose lowering drugs	prosody	[0]	[0]	[0]
665	A10BG03	pioglitazone	Blood glucose lowering drugs	reasoning abnormal	[0]	[0]	[0]
666	A10BG03	pioglitazone	Blood glucose lowering drugs	stereotypies	[1]	[0]	[0]
667	A10BH01	sitagliptin	Blood glucose lowering drugs	aphasia	0.64 (0.45-0.89) [37]	[3]	[0]
668	A10BH01	sitagliptin	Blood glucose lowering drugs	high productivity speech or thought	[1]	[6]	[0]
669	A10BH01	sitagliptin	Blood glucose lowering drugs	incoherence	0.69 (0.44-1.03) [24]	[9]	[1]
670	A10BH01	sitagliptin	Blood glucose lowering drugs	low productivity speech or thought	[5]	[5]	[4]
671	A10BH01	sitagliptin	Blood glucose lowering drugs	motor control or execution	1.04 (0.8-1.33) [64]	0.74 (0.35-1.36) [10]	[6]
672	A10BH01	sitagliptin	Blood glucose lowering drugs	phonatory	0.82 (0.69-0.97) [138]	[6]	[0]
673	A10BH01	sitagliptin	Blood glucose lowering drugs	prosody	[0]	[0]	[0]
674	A10BH01	sitagliptin	Blood glucose lowering drugs	reasoning abnormal	[0]	[0]	[0]
675	A10BH01	sitagliptin	Blood glucose lowering drugs	stereotypies	[0]	[1]	[0]
676	A10BH02	vildagliptin	Blood glucose lowering drugs	aphasia	[9]	[3]	NA
677	A10BH02	vildagliptin	Blood glucose lowering drugs	high productivity speech or thought	[0]	[0]	NA
678	A10BH02	vildagliptin	Blood glucose lowering drugs	incoherence	[1]	[0]	NA
679	A10BH02	vildagliptin	Blood glucose lowering drugs	low productivity speech or thought	[1]	[3]	NA
680	A10BH02	vildagliptin	Blood glucose lowering drugs	motor control or execution	1.62 (0.8-2.9) [11]	[0]	NA
681	A10BH02	vildagliptin	Blood glucose lowering drugs	phonatory	1.02 (0.61-1.61) [19]	[4]	NA
682	A10BH02	vildagliptin	Blood glucose lowering drugs	prosody	[0]	[0]	NA
683	A10BH02	vildagliptin	Blood glucose lowering drugs	reasoning abnormal	[1]	[0]	NA
684	A10BH02	vildagliptin	Blood glucose lowering drugs	stereotypies	[0]	[1]	NA
685	A10BH03	saxagliptin	Blood glucose lowering drugs	aphasia	[2]	NA	NA
686	A10BH03	saxagliptin	Blood glucose lowering drugs	high productivity speech or thought	[0]	NA	NA
687	A10BH03	saxagliptin	Blood glucose lowering drugs	incoherence	[2]	NA	NA
688	A10BH03	saxagliptin	Blood glucose lowering drugs	low productivity speech or thought	[0]	NA	NA
689	A10BH03	saxagliptin	Blood glucose lowering drugs	motor control or execution	[2]	NA	NA
690	A10BH03	saxagliptin	Blood glucose lowering drugs	phonatory	0.71 (0.4-1.15) [16]	NA	NA
691	A10BH03	saxagliptin	Blood glucose lowering drugs	prosody	[0]	NA	NA
692	A10BH03	saxagliptin	Blood glucose lowering drugs	reasoning abnormal	[0]	NA	NA
693	A10BH03	saxagliptin	Blood glucose lowering drugs	stereotypies	[0]	NA	NA
694	A10BH04	alogliptin	Blood glucose lowering drugs	aphasia	[2]	NA	NA
695	A10BH04	alogliptin	Blood glucose lowering drugs	high productivity speech or thought	[1]	NA	NA
696	A10BH04	alogliptin	Blood glucose lowering drugs	incoherence	[0]	NA	NA
697	A10BH04	alogliptin	Blood glucose lowering drugs	low productivity speech or thought	[2]	NA	NA
698	A10BH04	alogliptin	Blood glucose lowering drugs	motor control or execution	[2]	NA	NA
699	A10BH04	alogliptin	Blood glucose lowering drugs	phonatory	[8]	NA	NA
700	A10BH04	alogliptin	Blood glucose lowering drugs	prosody	[0]	NA	NA
701	A10BH04	alogliptin	Blood glucose lowering drugs	reasoning abnormal	[0]	NA	NA
702	A10BH04	alogliptin	Blood glucose lowering drugs	stereotypies	[0]	NA	NA
703	A10BH05	linagliptin	Blood glucose lowering drugs	aphasia	[9]	NA	NA
704	A10BH05	linagliptin	Blood glucose lowering drugs	high productivity speech or thought	[2]	NA	NA
705	A10BH05	linagliptin	Blood glucose lowering drugs	incoherence	[8]	NA	NA
706	A10BH05	linagliptin	Blood glucose lowering drugs	low productivity speech or thought	[0]	NA	NA
707	A10BH05	linagliptin	Blood glucose lowering drugs	motor control or execution	0.68 (0.32-1.26) [10]	NA	NA
708	A10BH05	linagliptin	Blood glucose lowering drugs	phonatory	0.98 (0.69-1.34) [39]	NA	NA
709	A10BH05	linagliptin	Blood glucose lowering drugs	prosody	[0]	NA	NA
710	A10BH05	linagliptin	Blood glucose lowering drugs	reasoning abnormal	[0]	NA	NA
711	A10BH05	linagliptin	Blood glucose lowering drugs	stereotypies	[1]	NA	NA
712	A10BJ01	exenatide	Blood glucose lowering drugs	aphasia	0.15 (0.08-0.26) [13]	[1]	NA
713	A10BJ01	exenatide	Blood glucose lowering drugs	high productivity speech or thought	[8]	[0]	NA
714	A10BJ01	exenatide	Blood glucose lowering drugs	incoherence	1.14 (0.86-1.49) [57]	[3]	NA
715	A10BJ01	exenatide	Blood glucose lowering drugs	low productivity speech or thought	[7]	[0]	NA
716	A10BJ01	exenatide	Blood glucose lowering drugs	motor control or execution	0.44 (0.32-0.61) [40]	[4]	NA
717	A10BJ01	exenatide	Blood glucose lowering drugs	phonatory	0.64 (0.55-0.75) [157]	2.73 (1.3-5.07) [10]	NA
718	A10BJ01	exenatide	Blood glucose lowering drugs	prosody	[0]	[0]	NA
719	A10BJ01	exenatide	Blood glucose lowering drugs	reasoning abnormal	[1]	[0]	NA
720	A10BJ01	exenatide	Blood glucose lowering drugs	stereotypies	[0]	[0]	NA
721	A10BJ02	liraglutide	Blood glucose lowering drugs	aphasia	[7]	[3]	NA
722	A10BJ02	liraglutide	Blood glucose lowering drugs	high productivity speech or thought	[4]	[3]	NA
723	A10BJ02	liraglutide	Blood glucose lowering drugs	incoherence	0.86 (0.53-1.31) [21]	[3]	NA
724	A10BJ02	liraglutide	Blood glucose lowering drugs	low productivity speech or thought	[1]	[3]	NA
725	A10BJ02	liraglutide	Blood glucose lowering drugs	motor control or execution	0.45 (0.27-0.7) [20]	[1]	NA
726	A10BJ02	liraglutide	Blood glucose lowering drugs	phonatory	1.18 (0.99-1.4) [140]	[1]	NA
727	A10BJ02	liraglutide	Blood glucose lowering drugs	prosody	[0]	[0]	NA
728	A10BJ02	liraglutide	Blood glucose lowering drugs	reasoning abnormal	[0]	[0]	NA
729	A10BJ02	liraglutide	Blood glucose lowering drugs	stereotypies	[0]	[0]	NA
730	A10BJ04	albiglutide	Blood glucose lowering drugs	aphasia	[1]	NA	NA
731	A10BJ04	albiglutide	Blood glucose lowering drugs	high productivity speech or thought	[0]	NA	NA
732	A10BJ04	albiglutide	Blood glucose lowering drugs	incoherence	[1]	NA	NA
733	A10BJ04	albiglutide	Blood glucose lowering drugs	low productivity speech or thought	[1]	NA	NA
734	A10BJ04	albiglutide	Blood glucose lowering drugs	motor control or execution	[2]	NA	NA
735	A10BJ04	albiglutide	Blood glucose lowering drugs	phonatory	0.4 (0.19-0.74) [10]	NA	NA
736	A10BJ04	albiglutide	Blood glucose lowering drugs	prosody	[0]	NA	NA
737	A10BJ04	albiglutide	Blood glucose lowering drugs	reasoning abnormal	[0]	NA	NA
738	A10BJ04	albiglutide	Blood glucose lowering drugs	stereotypies	[1]	NA	NA
739	A10BJ05	dulaglutide	Blood glucose lowering drugs	aphasia	0.3 (0.16-0.52) [13]	NA	NA
740	A10BJ05	dulaglutide	Blood glucose lowering drugs	high productivity speech or thought	[0]	NA	NA
741	A10BJ05	dulaglutide	Blood glucose lowering drugs	incoherence	1.74 (1.26-2.34) [44]	NA	NA
742	A10BJ05	dulaglutide	Blood glucose lowering drugs	low productivity speech or thought	1.68 (0.8-3.11) [10]	NA	NA
743	A10BJ05	dulaglutide	Blood glucose lowering drugs	motor control or execution	0.44 (0.26-0.68) [20]	NA	NA
744	A10BJ05	dulaglutide	Blood glucose lowering drugs	phonatory	0.82 (0.67-1) [102]	NA	NA
745	A10BJ05	dulaglutide	Blood glucose lowering drugs	prosody	[0]	NA	NA
746	A10BJ05	dulaglutide	Blood glucose lowering drugs	reasoning abnormal	[1]	NA	NA
747	A10BJ05	dulaglutide	Blood glucose lowering drugs	stereotypies	[0]	NA	NA
748	A10BJ06	semaglutide	Blood glucose lowering drugs	aphasia	[2]	NA	NA
749	A10BJ06	semaglutide	Blood glucose lowering drugs	high productivity speech or thought	[0]	NA	NA
750	A10BJ06	semaglutide	Blood glucose lowering drugs	incoherence	1.86 (0.93-3.34) [11]	NA	NA
751	A10BJ06	semaglutide	Blood glucose lowering drugs	low productivity speech or thought	[1]	NA	NA
752	A10BJ06	semaglutide	Blood glucose lowering drugs	motor control or execution	[5]	NA	NA
753	A10BJ06	semaglutide	Blood glucose lowering drugs	phonatory	0.9 (0.59-1.33) [26]	NA	NA
754	A10BJ06	semaglutide	Blood glucose lowering drugs	prosody	[0]	NA	NA
755	A10BJ06	semaglutide	Blood glucose lowering drugs	reasoning abnormal	[0]	NA	NA
756	A10BJ06	semaglutide	Blood glucose lowering drugs	stereotypies	[0]	NA	NA
757	A10BK01	dapagliflozin	Blood glucose lowering drugs	aphasia	[2]	NA	NA
758	A10BK01	dapagliflozin	Blood glucose lowering drugs	high productivity speech or thought	[1]	NA	NA
759	A10BK01	dapagliflozin	Blood glucose lowering drugs	incoherence	[8]	NA	NA
760	A10BK01	dapagliflozin	Blood glucose lowering drugs	low productivity speech or thought	[0]	NA	NA
761	A10BK01	dapagliflozin	Blood glucose lowering drugs	motor control or execution	0.85 (0.47-1.41) [15]	NA	NA
762	A10BK01	dapagliflozin	Blood glucose lowering drugs	phonatory	0.43 (0.27-0.67) [21]	NA	NA
763	A10BK01	dapagliflozin	Blood glucose lowering drugs	prosody	[0]	NA	NA
764	A10BK01	dapagliflozin	Blood glucose lowering drugs	reasoning abnormal	[0]	NA	NA
765	A10BK01	dapagliflozin	Blood glucose lowering drugs	stereotypies	[0]	NA	NA
766	A10BK02	canagliflozin	Blood glucose lowering drugs	aphasia	[2]	NA	NA
767	A10BK02	canagliflozin	Blood glucose lowering drugs	high productivity speech or thought	[1]	NA	NA
768	A10BK02	canagliflozin	Blood glucose lowering drugs	incoherence	0.67 (0.33-1.2) [11]	NA	NA
769	A10BK02	canagliflozin	Blood glucose lowering drugs	low productivity speech or thought	[1]	NA	NA
770	A10BK02	canagliflozin	Blood glucose lowering drugs	motor control or execution	[7]	NA	NA
771	A10BK02	canagliflozin	Blood glucose lowering drugs	phonatory	0.26 (0.16-0.4) [21]	NA	NA
772	A10BK02	canagliflozin	Blood glucose lowering drugs	prosody	[0]	NA	NA
773	A10BK02	canagliflozin	Blood glucose lowering drugs	reasoning abnormal	[0]	NA	NA
774	A10BK02	canagliflozin	Blood glucose lowering drugs	stereotypies	[0]	NA	NA
775	A10BK03	empagliflozin	Blood glucose lowering drugs	aphasia	0.45 (0.22-0.82) [11]	[1]	NA
776	A10BK03	empagliflozin	Blood glucose lowering drugs	high productivity speech or thought	[2]	[0]	NA
777	A10BK03	empagliflozin	Blood glucose lowering drugs	incoherence	0.76 (0.38-1.37) [11]	[0]	NA
778	A10BK03	empagliflozin	Blood glucose lowering drugs	low productivity speech or thought	[4]	[0]	NA
779	A10BK03	empagliflozin	Blood glucose lowering drugs	motor control or execution	[9]	[2]	NA
780	A10BK03	empagliflozin	Blood glucose lowering drugs	phonatory	0.48 (0.33-0.67) [34]	[2]	NA
781	A10BK03	empagliflozin	Blood glucose lowering drugs	prosody	[0]	[0]	NA
782	A10BK03	empagliflozin	Blood glucose lowering drugs	reasoning abnormal	[0]	[1]	NA
783	A10BK03	empagliflozin	Blood glucose lowering drugs	stereotypies	[0]	[0]	NA
784	A10BX02	repaglinide	Blood glucose lowering drugs	aphasia	1.9 (0.98-3.33) [12]	[0]	NA
785	A10BX02	repaglinide	Blood glucose lowering drugs	high productivity speech or thought	[0]	[0]	NA
786	A10BX02	repaglinide	Blood glucose lowering drugs	incoherence	[1]	[1]	NA
787	A10BX02	repaglinide	Blood glucose lowering drugs	low productivity speech or thought	[6]	[3]	NA
788	A10BX02	repaglinide	Blood glucose lowering drugs	motor control or execution	3.56 (2.27-5.3) [24]*	[7]	NA
789	A10BX02	repaglinide	Blood glucose lowering drugs	phonatory	0.75 (0.41-1.27) [14]	[1]	NA
790	A10BX02	repaglinide	Blood glucose lowering drugs	prosody	[0]	[0]	NA
791	A10BX02	repaglinide	Blood glucose lowering drugs	reasoning abnormal	[0]	[0]	NA
792	A10BX02	repaglinide	Blood glucose lowering drugs	stereotypies	[0]	[1]	NA
793	A10BX03	nateglinide	Blood glucose lowering drugs	aphasia	[1]	NA	NA
794	A10BX03	nateglinide	Blood glucose lowering drugs	high productivity speech or thought	[1]	NA	NA
795	A10BX03	nateglinide	Blood glucose lowering drugs	incoherence	[2]	NA	NA
796	A10BX03	nateglinide	Blood glucose lowering drugs	low productivity speech or thought	[0]	NA	NA
797	A10BX03	nateglinide	Blood glucose lowering drugs	motor control or execution	[4]	NA	NA
798	A10BX03	nateglinide	Blood glucose lowering drugs	phonatory	[5]	NA	NA
799	A10BX03	nateglinide	Blood glucose lowering drugs	prosody	[0]	NA	NA
800	A10BX03	nateglinide	Blood glucose lowering drugs	reasoning abnormal	[0]	NA	NA
801	A10BX03	nateglinide	Blood glucose lowering drugs	stereotypies	[0]	NA	NA
802	A11CC01	ergocalciferol	Vitamin A and D	aphasia	1.05 (0.61-1.69) [17]	[9]	[2]
803	A11CC01	ergocalciferol	Vitamin A and D	high productivity speech or thought	[0]	[5]	[1]
804	A11CC01	ergocalciferol	Vitamin A and D	incoherence	1.13 (0.56-2.04) [11]	0.84 (0.44-1.45) [13]	[2]
805	A11CC01	ergocalciferol	Vitamin A and D	low productivity speech or thought	[4]	[0]	[0]
806	A11CC01	ergocalciferol	Vitamin A and D	motor control or execution	1.44 (0.93-2.14) [25]	1.05 (0.6-1.72) [16]	[5]
807	A11CC01	ergocalciferol	Vitamin A and D	phonatory	1.77 (1.41-2.2) [83]*	1.76 (0.93-3.03) [13]	[2]
808	A11CC01	ergocalciferol	Vitamin A and D	prosody	[0]	[0]	[0]
809	A11CC01	ergocalciferol	Vitamin A and D	reasoning abnormal	[0]	[0]	[0]
810	A11CC01	ergocalciferol	Vitamin A and D	stereotypies	[0]	[0]	[0]
811	A11CC03	alfacalcidol	Vitamin A and D	aphasia	1.27 (0.6-2.34) [10]	NA	NA
812	A11CC03	alfacalcidol	Vitamin A and D	high productivity speech or thought	[4]	NA	NA
813	A11CC03	alfacalcidol	Vitamin A and D	incoherence	[4]	NA	NA
814	A11CC03	alfacalcidol	Vitamin A and D	low productivity speech or thought	[3]	NA	NA
815	A11CC03	alfacalcidol	Vitamin A and D	motor control or execution	3.09 (2.01-4.54) [26]*	NA	NA
816	A11CC03	alfacalcidol	Vitamin A and D	phonatory	0.47 (0.23-0.85) [11]	NA	NA
817	A11CC03	alfacalcidol	Vitamin A and D	prosody	[0]	NA	NA
818	A11CC03	alfacalcidol	Vitamin A and D	reasoning abnormal	[0]	NA	NA
819	A11CC03	alfacalcidol	Vitamin A and D	stereotypies	[0]	NA	NA
820	A11CC05	colecalciferol	Vitamin A and D	aphasia	1.42 (1.15-1.73) [100]	1.41 (1.02-1.91) [44]	2.19 (1.03-4.09) [10]
821	A11CC05	colecalciferol	Vitamin A and D	high productivity speech or thought	[7]	0.54 (0.33-0.85) [20]	[5]
822	A11CC05	colecalciferol	Vitamin A and D	incoherence	0.82 (0.57-1.14) [35]	0.38 (0.24-0.56) [25]	[8]
823	A11CC05	colecalciferol	Vitamin A and D	low productivity speech or thought	1.41 (0.76-2.37) [14]	0.73 (0.37-1.29) [12]	[2]
824	A11CC05	colecalciferol	Vitamin A and D	motor control or execution	1.11 (0.88-1.37) [84]	0.86 (0.64-1.12) [55]	2.11 (1.46-2.97) [35]
825	A11CC05	colecalciferol	Vitamin A and D	phonatory	1.6 (1.43-1.78) [328]*	1.7 (1.26-2.25) [52]	[8]
826	A11CC05	colecalciferol	Vitamin A and D	prosody	[0]	[0]	[0]
827	A11CC05	colecalciferol	Vitamin A and D	reasoning abnormal	[4]	[1]	[0]
828	A11CC05	colecalciferol	Vitamin A and D	stereotypies	[0]	[2]	[2]
829	A11DA01	thiamine	Vitamin B1	aphasia	1.03 (0.65-1.55) [23]	[8]	[0]
830	A11DA01	thiamine	Vitamin B1	high productivity speech or thought	[4]	0.68 (0.32-1.25) [10]	[3]
831	A11DA01	thiamine	Vitamin B1	incoherence	1.57 (0.97-2.41) [21]	0.52 (0.28-0.88) [14]	[7]
832	A11DA01	thiamine	Vitamin B1	low productivity speech or thought	[4]	[3]	[0]
833	A11DA01	thiamine	Vitamin B1	motor control or execution	1.09 (0.71-1.6) [26]	0.76 (0.46-1.19) [20]	[9]
834	A11DA01	thiamine	Vitamin B1	phonatory	1.09 (0.85-1.38) [71]	1.42 (0.83-2.26) [18]	[1]
835	A11DA01	thiamine	Vitamin B1	prosody	[0]	[0]	[0]
836	A11DA01	thiamine	Vitamin B1	reasoning abnormal	[0]	[1]	[1]
837	A11DA01	thiamine	Vitamin B1	stereotypies	[0]	[1]	[0]
838	A11GA01	ascorbic acid	Ascorbic acid	aphasia	0.79 (0.61-1.01) [66]	0.89 (0.54-1.36) [21]	[2]
839	A11GA01	ascorbic acid	Ascorbic acid	high productivity speech or thought	1.46 (0.75-2.56) [12]	0.47 (0.25-0.82) [13]	[5]
840	A11GA01	ascorbic acid	Ascorbic acid	incoherence	1 (0.74-1.33) [50]	0.51 (0.33-0.75) [25]	1.71 (0.85-3.1) [11]
841	A11GA01	ascorbic acid	Ascorbic acid	low productivity speech or thought	[7]	[6]	[2]
842	A11GA01	ascorbic acid	Ascorbic acid	motor control or execution	0.84 (0.66-1.05) [75]	0.68 (0.47-0.97) [33]	1.18 (0.56-2.19) [10]
843	A11GA01	ascorbic acid	Ascorbic acid	phonatory	1.25 (1.11-1.4) [301]	2.01 (1.46-2.71) [46]	[5]
844	A11GA01	ascorbic acid	Ascorbic acid	prosody	[0]	[0]	[0]
845	A11GA01	ascorbic acid	Ascorbic acid	reasoning abnormal	[3]	[0]	[0]
846	A11GA01	ascorbic acid	Ascorbic acid	stereotypies	[1]	[0]	[0]
847	A11HA01	nicotinamide	Other vitamins	aphasia	0.9 (0.51-1.46) [16]	[6]	[0]
848	A11HA01	nicotinamide	Other vitamins	high productivity speech or thought	[3]	[5]	[2]
849	A11HA01	nicotinamide	Other vitamins	incoherence	[8]	[7]	[5]
850	A11HA01	nicotinamide	Other vitamins	low productivity speech or thought	[3]	[0]	[0]
851	A11HA01	nicotinamide	Other vitamins	motor control or execution	0.89 (0.52-1.43) [17]	[9]	[2]
852	A11HA01	nicotinamide	Other vitamins	phonatory	1.1 (0.83-1.43) [57]	1.57 (0.85-2.65) [14]	[0]
853	A11HA01	nicotinamide	Other vitamins	prosody	[0]	[0]	[0]
854	A11HA01	nicotinamide	Other vitamins	reasoning abnormal	[0]	[0]	[0]
855	A11HA01	nicotinamide	Other vitamins	stereotypies	[0]	[0]	[0]
856	A11HA02	pyridoxine	Other vitamins	aphasia	1.02 (0.68-1.46) [30]	0.79 (0.39-1.42) [11]	[0]
857	A11HA02	pyridoxine	Other vitamins	high productivity speech or thought	[4]	0.88 (0.48-1.48) [14]	[3]
858	A11HA02	pyridoxine	Other vitamins	incoherence	0.85 (0.47-1.4) [15]	0.52 (0.29-0.86) [15]	[7]
859	A11HA02	pyridoxine	Other vitamins	low productivity speech or thought	2.42 (1.16-4.47) [10]	[5]	[0]
860	A11HA02	pyridoxine	Other vitamins	motor control or execution	1.14 (0.79-1.58) [36]	0.56 (0.32-0.92) [16]	3.24 (1.83-5.35) [16]
861	A11HA02	pyridoxine	Other vitamins	phonatory	1 (0.8-1.24) [86]	1.23 (0.71-1.99) [17]	[4]
862	A11HA02	pyridoxine	Other vitamins	prosody	[0]	[0]	[0]
863	A11HA02	pyridoxine	Other vitamins	reasoning abnormal	[0]	[1]	[0]
864	A11HA02	pyridoxine	Other vitamins	stereotypies	[0]	[0]	[0]
865	A11HA03	tocopherol	Other vitamins	aphasia	0.59 (0.41-0.82) [35]	0.77 (0.41-1.33) [13]	[3]
866	A11HA03	tocopherol	Other vitamins	high productivity speech or thought	[4]	[7]	[2]
867	A11HA03	tocopherol	Other vitamins	incoherence	0.68 (0.43-1.01) [24]	0.52 (0.3-0.82) [18]	[9]
868	A11HA03	tocopherol	Other vitamins	low productivity speech or thought	[6]	[3]	[1]
869	A11HA03	tocopherol	Other vitamins	motor control or execution	0.49 (0.33-0.69) [31]	0.76 (0.5-1.13) [26]	[6]
870	A11HA03	tocopherol	Other vitamins	phonatory	1.02 (0.87-1.18) [175]	1.9 (1.28-2.72) [31]	[0]
871	A11HA03	tocopherol	Other vitamins	prosody	[0]	[0]	[0]
872	A11HA03	tocopherol	Other vitamins	reasoning abnormal	[0]	[0]	[0]
873	A11HA03	tocopherol	Other vitamins	stereotypies	[1]	[0]	[0]
874	A11HA05	biotin	Other vitamins	aphasia	1.11 (0.66-1.76) [18]	[6]	[2]
875	A11HA05	biotin	Other vitamins	high productivity speech or thought	[0]	[6]	[1]
876	A11HA05	biotin	Other vitamins	incoherence	1.03 (0.49-1.89) [10]	[5]	[5]
877	A11HA05	biotin	Other vitamins	low productivity speech or thought	[4]	[2]	[0]
878	A11HA05	biotin	Other vitamins	motor control or execution	1.09 (0.65-1.71) [19]	[8]	[3]
879	A11HA05	biotin	Other vitamins	phonatory	1.74 (1.38-2.17) [82]	2.38 (1.32-3.96) [15]	[0]
880	A11HA05	biotin	Other vitamins	prosody	[0]	[0]	[0]
881	A11HA05	biotin	Other vitamins	reasoning abnormal	[0]	[0]	[0]
882	A11HA05	biotin	Other vitamins	stereotypies	[0]	[0]	[0]
883	A16AA01	levocarnitine	Other alimentary	aphasia	[1]	NA	NA
884	A16AA01	levocarnitine	Other alimentary	high productivity speech or thought	[0]	NA	NA
885	A16AA01	levocarnitine	Other alimentary	incoherence	[1]	NA	NA
886	A16AA01	levocarnitine	Other alimentary	low productivity speech or thought	[1]	NA	NA
887	A16AA01	levocarnitine	Other alimentary	motor control or execution	[2]	NA	NA
888	A16AA01	levocarnitine	Other alimentary	phonatory	[7]	NA	NA
889	A16AA01	levocarnitine	Other alimentary	prosody	[0]	NA	NA
890	A16AA01	levocarnitine	Other alimentary	reasoning abnormal	[0]	NA	NA
891	A16AA01	levocarnitine	Other alimentary	stereotypies	[0]	NA	NA
892	A16AA02	ademetionine	Other alimentary	aphasia	NA	[0]	NA
893	A16AA02	ademetionine	Other alimentary	high productivity speech or thought	NA	[3]	NA
894	A16AA02	ademetionine	Other alimentary	incoherence	NA	[0]	NA
895	A16AA02	ademetionine	Other alimentary	low productivity speech or thought	NA	[0]	NA
896	A16AA02	ademetionine	Other alimentary	motor control or execution	NA	[4]	NA
897	A16AA02	ademetionine	Other alimentary	phonatory	NA	[1]	NA
898	A16AA02	ademetionine	Other alimentary	prosody	NA	[0]	NA
899	A16AA02	ademetionine	Other alimentary	reasoning abnormal	NA	[0]	NA
900	A16AA02	ademetionine	Other alimentary	stereotypies	NA	[0]	NA
901	A16AB02	imiglucerase	Other alimentary	aphasia	[0]	NA	NA
902	A16AB02	imiglucerase	Other alimentary	high productivity speech or thought	[0]	NA	NA
903	A16AB02	imiglucerase	Other alimentary	incoherence	[1]	NA	NA
904	A16AB02	imiglucerase	Other alimentary	low productivity speech or thought	[0]	NA	NA
905	A16AB02	imiglucerase	Other alimentary	motor control or execution	[6]	NA	NA
906	A16AB02	imiglucerase	Other alimentary	phonatory	[9]	NA	NA
907	A16AB02	imiglucerase	Other alimentary	prosody	[0]	NA	NA
908	A16AB02	imiglucerase	Other alimentary	reasoning abnormal	[0]	NA	NA
909	A16AB02	imiglucerase	Other alimentary	stereotypies	[0]	NA	NA
910	A16AB04	agalsidase beta	Other alimentary	aphasia	[7]	NA	NA
911	A16AB04	agalsidase beta	Other alimentary	high productivity speech or thought	[0]	NA	NA
912	A16AB04	agalsidase beta	Other alimentary	incoherence	[4]	NA	NA
913	A16AB04	agalsidase beta	Other alimentary	low productivity speech or thought	[0]	NA	NA
914	A16AB04	agalsidase beta	Other alimentary	motor control or execution	2.6 (1.45-4.29) [15]	NA	NA
915	A16AB04	agalsidase beta	Other alimentary	phonatory	[8]	NA	NA
916	A16AB04	agalsidase beta	Other alimentary	prosody	[0]	NA	NA
917	A16AB04	agalsidase beta	Other alimentary	reasoning abnormal	[1]	NA	NA
918	A16AB04	agalsidase beta	Other alimentary	stereotypies	[0]	NA	NA
919	A16AB05	laronidase	Other alimentary	aphasia	[7]	NA	NA
920	A16AB05	laronidase	Other alimentary	high productivity speech or thought	[0]	NA	NA
921	A16AB05	laronidase	Other alimentary	incoherence	[1]	NA	NA
922	A16AB05	laronidase	Other alimentary	low productivity speech or thought	[0]	NA	NA
923	A16AB05	laronidase	Other alimentary	motor control or execution	[0]	NA	NA
924	A16AB05	laronidase	Other alimentary	phonatory	[8]	NA	NA
925	A16AB05	laronidase	Other alimentary	prosody	[0]	NA	NA
926	A16AB05	laronidase	Other alimentary	reasoning abnormal	[0]	NA	NA
927	A16AB05	laronidase	Other alimentary	stereotypies	[0]	NA	NA
928	A16AB07	alglucosidase alfa	Other alimentary	aphasia	[1]	NA	NA
929	A16AB07	alglucosidase alfa	Other alimentary	high productivity speech or thought	[0]	NA	NA
930	A16AB07	alglucosidase alfa	Other alimentary	incoherence	[0]	NA	NA
931	A16AB07	alglucosidase alfa	Other alimentary	low productivity speech or thought	[0]	NA	NA
932	A16AB07	alglucosidase alfa	Other alimentary	motor control or execution	[9]	NA	NA
933	A16AB07	alglucosidase alfa	Other alimentary	phonatory	[3]	NA	NA
934	A16AB07	alglucosidase alfa	Other alimentary	prosody	[0]	NA	NA
935	A16AB07	alglucosidase alfa	Other alimentary	reasoning abnormal	[0]	NA	NA
936	A16AB07	alglucosidase alfa	Other alimentary	stereotypies	[0]	NA	NA
937	A16AB09	idursulfase	Other alimentary	aphasia	[5]	NA	NA
938	A16AB09	idursulfase	Other alimentary	high productivity speech or thought	[0]	NA	NA
939	A16AB09	idursulfase	Other alimentary	incoherence	[0]	NA	NA
940	A16AB09	idursulfase	Other alimentary	low productivity speech or thought	[0]	NA	NA
941	A16AB09	idursulfase	Other alimentary	motor control or execution	[1]	NA	NA
942	A16AB09	idursulfase	Other alimentary	phonatory	1.67 (0.91-2.81) [14]	NA	NA
943	A16AB09	idursulfase	Other alimentary	prosody	[0]	NA	NA
944	A16AB09	idursulfase	Other alimentary	reasoning abnormal	[0]	NA	NA
945	A16AB09	idursulfase	Other alimentary	stereotypies	[0]	NA	NA
946	A16AB12	elosulfase alfa	Other alimentary	aphasia	[2]	NA	NA
947	A16AB12	elosulfase alfa	Other alimentary	high productivity speech or thought	[0]	NA	NA
948	A16AB12	elosulfase alfa	Other alimentary	incoherence	[1]	NA	NA
949	A16AB12	elosulfase alfa	Other alimentary	low productivity speech or thought	[0]	NA	NA
950	A16AB12	elosulfase alfa	Other alimentary	motor control or execution	[0]	NA	NA
951	A16AB12	elosulfase alfa	Other alimentary	phonatory	[3]	NA	NA
952	A16AB12	elosulfase alfa	Other alimentary	prosody	[0]	NA	NA
953	A16AB12	elosulfase alfa	Other alimentary	reasoning abnormal	[0]	NA	NA
954	A16AB12	elosulfase alfa	Other alimentary	stereotypies	[0]	NA	NA
955	A16AB13	asfotase alfa	Other alimentary	aphasia	[2]	NA	NA
956	A16AB13	asfotase alfa	Other alimentary	high productivity speech or thought	[0]	NA	NA
957	A16AB13	asfotase alfa	Other alimentary	incoherence	[2]	NA	NA
958	A16AB13	asfotase alfa	Other alimentary	low productivity speech or thought	[0]	NA	NA
959	A16AB13	asfotase alfa	Other alimentary	motor control or execution	[0]	NA	NA
960	A16AB13	asfotase alfa	Other alimentary	phonatory	[1]	NA	NA
961	A16AB13	asfotase alfa	Other alimentary	prosody	[0]	NA	NA
962	A16AB13	asfotase alfa	Other alimentary	reasoning abnormal	[0]	NA	NA
963	A16AB13	asfotase alfa	Other alimentary	stereotypies	[0]	NA	NA
964	A16AB19	pegvaliase	Other alimentary	aphasia	[2]	NA	NA
965	A16AB19	pegvaliase	Other alimentary	high productivity speech or thought	[0]	NA	NA
966	A16AB19	pegvaliase	Other alimentary	incoherence	[1]	NA	NA
967	A16AB19	pegvaliase	Other alimentary	low productivity speech or thought	[1]	NA	NA
968	A16AB19	pegvaliase	Other alimentary	motor control or execution	[3]	NA	NA
969	A16AB19	pegvaliase	Other alimentary	phonatory	[3]	NA	NA
970	A16AB19	pegvaliase	Other alimentary	prosody	[0]	NA	NA
971	A16AB19	pegvaliase	Other alimentary	reasoning abnormal	[0]	NA	NA
972	A16AB19	pegvaliase	Other alimentary	stereotypies	[0]	NA	NA
973	A16AX01	thioctic acid	Other alimentary	aphasia	[5]	NA	NA
974	A16AX01	thioctic acid	Other alimentary	high productivity speech or thought	[0]	NA	NA
975	A16AX01	thioctic acid	Other alimentary	incoherence	[3]	NA	NA
976	A16AX01	thioctic acid	Other alimentary	low productivity speech or thought	[0]	NA	NA
977	A16AX01	thioctic acid	Other alimentary	motor control or execution	[2]	NA	NA
978	A16AX01	thioctic acid	Other alimentary	phonatory	[7]	NA	NA
979	A16AX01	thioctic acid	Other alimentary	prosody	[0]	NA	NA
980	A16AX01	thioctic acid	Other alimentary	reasoning abnormal	[0]	NA	NA
981	A16AX01	thioctic acid	Other alimentary	stereotypies	[0]	NA	NA
982	A16AX04	nitisinone	Other alimentary	aphasia	[0]	NA	NA
983	A16AX04	nitisinone	Other alimentary	high productivity speech or thought	[0]	NA	NA
984	A16AX04	nitisinone	Other alimentary	incoherence	[0]	NA	NA
985	A16AX04	nitisinone	Other alimentary	low productivity speech or thought	[0]	NA	NA
986	A16AX04	nitisinone	Other alimentary	motor control or execution	[0]	NA	NA
987	A16AX04	nitisinone	Other alimentary	phonatory	[1]	NA	NA
988	A16AX04	nitisinone	Other alimentary	prosody	[0]	NA	NA
989	A16AX04	nitisinone	Other alimentary	reasoning abnormal	[0]	NA	NA
990	A16AX04	nitisinone	Other alimentary	stereotypies	[0]	NA	NA
991	A16AX06	miglustat	Other alimentary	aphasia	[7]	NA	NA
992	A16AX06	miglustat	Other alimentary	high productivity speech or thought	[3]	NA	NA
993	A16AX06	miglustat	Other alimentary	incoherence	[1]	NA	NA
994	A16AX06	miglustat	Other alimentary	low productivity speech or thought	[0]	NA	NA
995	A16AX06	miglustat	Other alimentary	motor control or execution	[8]	NA	NA
996	A16AX06	miglustat	Other alimentary	phonatory	[2]	NA	NA
997	A16AX06	miglustat	Other alimentary	prosody	[0]	NA	NA
998	A16AX06	miglustat	Other alimentary	reasoning abnormal	[0]	NA	NA
999	A16AX06	miglustat	Other alimentary	stereotypies	[0]	NA	NA
1000	A16AX07	sapropterin	Other alimentary	aphasia	[1]	NA	NA
1001	A16AX07	sapropterin	Other alimentary	high productivity speech or thought	[6]	NA	NA
1002	A16AX07	sapropterin	Other alimentary	incoherence	[3]	NA	NA
1003	A16AX07	sapropterin	Other alimentary	low productivity speech or thought	[0]	NA	NA
1004	A16AX07	sapropterin	Other alimentary	motor control or execution	[2]	NA	NA
1005	A16AX07	sapropterin	Other alimentary	phonatory	[3]	NA	NA
1006	A16AX07	sapropterin	Other alimentary	prosody	[0]	NA	NA
1007	A16AX07	sapropterin	Other alimentary	reasoning abnormal	[0]	NA	NA
1008	A16AX07	sapropterin	Other alimentary	stereotypies	[0]	NA	NA
1009	A16AX08	teduglutide	Other alimentary	aphasia	[3]	NA	NA
1010	A16AX08	teduglutide	Other alimentary	high productivity speech or thought	[0]	NA	NA
1011	A16AX08	teduglutide	Other alimentary	incoherence	[2]	NA	NA
1012	A16AX08	teduglutide	Other alimentary	low productivity speech or thought	[0]	NA	NA
1013	A16AX08	teduglutide	Other alimentary	motor control or execution	[2]	NA	NA
1014	A16AX08	teduglutide	Other alimentary	phonatory	[6]	NA	NA
1015	A16AX08	teduglutide	Other alimentary	prosody	[0]	NA	NA
1016	A16AX08	teduglutide	Other alimentary	reasoning abnormal	[0]	NA	NA
1017	A16AX08	teduglutide	Other alimentary	stereotypies	[0]	NA	NA
1018	A16AX15	telotristat	Other alimentary	aphasia	[2]	NA	NA
1019	A16AX15	telotristat	Other alimentary	high productivity speech or thought	[0]	NA	NA
1020	A16AX15	telotristat	Other alimentary	incoherence	[0]	NA	NA
1021	A16AX15	telotristat	Other alimentary	low productivity speech or thought	[0]	NA	NA
1022	A16AX15	telotristat	Other alimentary	motor control or execution	[1]	NA	NA
1023	A16AX15	telotristat	Other alimentary	phonatory	[9]	NA	NA
1024	A16AX15	telotristat	Other alimentary	prosody	[0]	NA	NA
1025	A16AX15	telotristat	Other alimentary	reasoning abnormal	[0]	NA	NA
1026	A16AX15	telotristat	Other alimentary	stereotypies	[0]	NA	NA
1027	B01AA03	warfarin	Antithrombotic	aphasia	1.61 (1.41-1.84) [226]*	1.93 (1.3-2.76) [31]	[5]
1028	B01AA03	warfarin	Antithrombotic	high productivity speech or thought	[8]	0.74 (0.4-1.26) [14]	[1]
1029	B01AA03	warfarin	Antithrombotic	incoherence	0.86 (0.67-1.08) [73]	0.68 (0.43-1.03) [23]	[3]
1030	B01AA03	warfarin	Antithrombotic	low productivity speech or thought	0.95 (0.57-1.49) [19]	1.19 (0.57-2.21) [10]	[1]
1031	B01AA03	warfarin	Antithrombotic	motor control or execution	1.46 (1.28-1.67) [221]*	1.09 (0.76-1.52) [36]	[2]
1032	B01AA03	warfarin	Antithrombotic	phonatory	1.04 (0.94-1.14) [429]	1.56 (1-2.32) [25]	[0]
1033	B01AA03	warfarin	Antithrombotic	prosody	[0]	[0]	[0]
1034	B01AA03	warfarin	Antithrombotic	reasoning abnormal	[0]	[1]	[1]
1035	B01AA03	warfarin	Antithrombotic	stereotypies	[4]	[1]	[0]
1036	B01AA04	phenprocoumon	Antithrombotic	aphasia	5 (3.26-7.35) [26]*	NA	NA
1037	B01AA04	phenprocoumon	Antithrombotic	high productivity speech or thought	[0]	NA	NA
1038	B01AA04	phenprocoumon	Antithrombotic	incoherence	[0]	NA	NA
1039	B01AA04	phenprocoumon	Antithrombotic	low productivity speech or thought	[0]	NA	NA
1040	B01AA04	phenprocoumon	Antithrombotic	motor control or execution	2.49 (1.36-4.2) [14]	NA	NA
1041	B01AA04	phenprocoumon	Antithrombotic	phonatory	[6]	NA	NA
1042	B01AA04	phenprocoumon	Antithrombotic	prosody	[0]	NA	NA
1043	B01AA04	phenprocoumon	Antithrombotic	reasoning abnormal	[0]	NA	NA
1044	B01AA04	phenprocoumon	Antithrombotic	stereotypies	[1]	NA	NA
1045	B01AA07	acenocoumarol	Antithrombotic	aphasia	3.16 (1.87-5) [18]	NA	NA
1046	B01AA07	acenocoumarol	Antithrombotic	high productivity speech or thought	[0]	NA	NA
1047	B01AA07	acenocoumarol	Antithrombotic	incoherence	[3]	NA	NA
1048	B01AA07	acenocoumarol	Antithrombotic	low productivity speech or thought	[1]	NA	NA
1049	B01AA07	acenocoumarol	Antithrombotic	motor control or execution	2.61 (1.49-4.25) [16]	NA	NA
1050	B01AA07	acenocoumarol	Antithrombotic	phonatory	[6]	NA	NA
1051	B01AA07	acenocoumarol	Antithrombotic	prosody	[0]	NA	NA
1052	B01AA07	acenocoumarol	Antithrombotic	reasoning abnormal	[1]	NA	NA
1053	B01AA07	acenocoumarol	Antithrombotic	stereotypies	[0]	NA	NA
1054	B01AA12	fluindione	Antithrombotic	aphasia	1.87 (0.93-3.36) [11]	NA	NA
1055	B01AA12	fluindione	Antithrombotic	high productivity speech or thought	[2]	NA	NA
1056	B01AA12	fluindione	Antithrombotic	incoherence	[2]	NA	NA
1057	B01AA12	fluindione	Antithrombotic	low productivity speech or thought	[0]	NA	NA
1058	B01AA12	fluindione	Antithrombotic	motor control or execution	[7]	NA	NA
1059	B01AA12	fluindione	Antithrombotic	phonatory	[5]	NA	NA
1060	B01AA12	fluindione	Antithrombotic	prosody	[0]	NA	NA
1061	B01AA12	fluindione	Antithrombotic	reasoning abnormal	[1]	NA	NA
1062	B01AA12	fluindione	Antithrombotic	stereotypies	[2]	NA	NA
1063	B01AB04	dalteparin	Antithrombotic	aphasia	[6]	NA	NA
1064	B01AB04	dalteparin	Antithrombotic	high productivity speech or thought	[0]	NA	NA
1065	B01AB04	dalteparin	Antithrombotic	incoherence	[2]	NA	NA
1066	B01AB04	dalteparin	Antithrombotic	low productivity speech or thought	[0]	NA	NA
1067	B01AB04	dalteparin	Antithrombotic	motor control or execution	2.19 (1.09-3.92) [11]	NA	NA
1068	B01AB04	dalteparin	Antithrombotic	phonatory	[9]	NA	NA
1069	B01AB04	dalteparin	Antithrombotic	prosody	[0]	NA	NA
1070	B01AB04	dalteparin	Antithrombotic	reasoning abnormal	[0]	NA	NA
1071	B01AB04	dalteparin	Antithrombotic	stereotypies	[1]	NA	NA
1072	B01AB05	enoxaparin	Antithrombotic	aphasia	1.67 (1.25-2.18) [54]	1.47 (0.73-2.65) [11]	[3]
1073	B01AB05	enoxaparin	Antithrombotic	high productivity speech or thought	[0]	[0]	[3]
1074	B01AB05	enoxaparin	Antithrombotic	incoherence	[9]	[1]	[8]
1075	B01AB05	enoxaparin	Antithrombotic	low productivity speech or thought	[3]	[8]	[0]
1076	B01AB05	enoxaparin	Antithrombotic	motor control or execution	0.86 (0.58-1.23) [30]	0.98 (0.55-1.63) [15]	[2]
1077	B01AB05	enoxaparin	Antithrombotic	phonatory	0.75 (0.58-0.94) [71]	[7]	[4]
1078	B01AB05	enoxaparin	Antithrombotic	prosody	[0]	[0]	[0]
1079	B01AB05	enoxaparin	Antithrombotic	reasoning abnormal	[0]	[0]	[0]
1080	B01AB05	enoxaparin	Antithrombotic	stereotypies	[0]	[0]	[0]
1081	B01AB06	nadroparin	Antithrombotic	aphasia	[7]	NA	NA
1082	B01AB06	nadroparin	Antithrombotic	high productivity speech or thought	[0]	NA	NA
1083	B01AB06	nadroparin	Antithrombotic	incoherence	[0]	NA	NA
1084	B01AB06	nadroparin	Antithrombotic	low productivity speech or thought	[0]	NA	NA
1085	B01AB06	nadroparin	Antithrombotic	motor control or execution	[2]	NA	NA
1086	B01AB06	nadroparin	Antithrombotic	phonatory	[2]	NA	NA
1087	B01AB06	nadroparin	Antithrombotic	prosody	[0]	NA	NA
1088	B01AB06	nadroparin	Antithrombotic	reasoning abnormal	[0]	NA	NA
1089	B01AB06	nadroparin	Antithrombotic	stereotypies	[0]	NA	NA
1090	B01AB10	tinzaparin	Antithrombotic	aphasia	3.87 (2.06-6.64) [13]	NA	NA
1091	B01AB10	tinzaparin	Antithrombotic	high productivity speech or thought	[0]	NA	NA
1092	B01AB10	tinzaparin	Antithrombotic	incoherence	[2]	NA	NA
1093	B01AB10	tinzaparin	Antithrombotic	low productivity speech or thought	[0]	NA	NA
1094	B01AB10	tinzaparin	Antithrombotic	motor control or execution	[3]	NA	NA
1095	B01AB10	tinzaparin	Antithrombotic	phonatory	[7]	NA	NA
1096	B01AB10	tinzaparin	Antithrombotic	prosody	[0]	NA	NA
1097	B01AB10	tinzaparin	Antithrombotic	reasoning abnormal	[0]	NA	NA
1098	B01AB10	tinzaparin	Antithrombotic	stereotypies	[0]	NA	NA
1099	B01AC04	clopidogrel	Antithrombotic	aphasia	2.35 (1.97-2.79) [137]*	1.28 (0.82-1.92) [24]	[0]
1100	B01AC04	clopidogrel	Antithrombotic	high productivity speech or thought	[3]	0.46 (0.22-0.85) [10]	[2]
1101	B01AC04	clopidogrel	Antithrombotic	incoherence	1.16 (0.83-1.58) [41]	0.98 (0.69-1.36) [38]	[6]
1102	B01AC04	clopidogrel	Antithrombotic	low productivity speech or thought	1.21 (0.57-2.23) [10]	1.56 (0.87-2.61) [15]	[3]
1103	B01AC04	clopidogrel	Antithrombotic	motor control or execution	2.06 (1.72-2.45) [129]*	0.92 (0.63-1.28) [35]	2 (1.11-3.35) [15]
1104	B01AC04	clopidogrel	Antithrombotic	phonatory	1 (0.86-1.16) [172]	1.13 (0.69-1.73) [21]	[0]
1105	B01AC04	clopidogrel	Antithrombotic	prosody	[0]	[0]	[0]
1106	B01AC04	clopidogrel	Antithrombotic	reasoning abnormal	[0]	[0]	[0]
1107	B01AC04	clopidogrel	Antithrombotic	stereotypies	[0]	[0]	[1]
1108	B01AC05	ticlopidine	Antithrombotic	aphasia	9.07 (5.52-14.07) [20]*	NA	NA
1109	B01AC05	ticlopidine	Antithrombotic	high productivity speech or thought	[1]	NA	NA
1110	B01AC05	ticlopidine	Antithrombotic	incoherence	[1]	NA	NA
1111	B01AC05	ticlopidine	Antithrombotic	low productivity speech or thought	[0]	NA	NA
1112	B01AC05	ticlopidine	Antithrombotic	motor control or execution	8.02 (4.81-12.57) [19]*	NA	NA
1113	B01AC05	ticlopidine	Antithrombotic	phonatory	[7]	NA	NA
1114	B01AC05	ticlopidine	Antithrombotic	prosody	[0]	NA	NA
1115	B01AC05	ticlopidine	Antithrombotic	reasoning abnormal	[1]	NA	NA
1116	B01AC05	ticlopidine	Antithrombotic	stereotypies	[0]	NA	NA
1117	B01AC07	dipyridamole	Antithrombotic	aphasia	[3]	[2]	NA
1118	B01AC07	dipyridamole	Antithrombotic	high productivity speech or thought	[0]	[0]	NA
1119	B01AC07	dipyridamole	Antithrombotic	incoherence	[2]	[2]	NA
1120	B01AC07	dipyridamole	Antithrombotic	low productivity speech or thought	[0]	[0]	NA
1121	B01AC07	dipyridamole	Antithrombotic	motor control or execution	[6]	[4]	NA
1122	B01AC07	dipyridamole	Antithrombotic	phonatory	[9]	[6]	NA
1123	B01AC07	dipyridamole	Antithrombotic	prosody	[0]	[0]	NA
1124	B01AC07	dipyridamole	Antithrombotic	reasoning abnormal	[0]	[2]	NA
1125	B01AC07	dipyridamole	Antithrombotic	stereotypies	[0]	[0]	NA
1126	B01AC09	epoprostenol	Antithrombotic	aphasia	[8]	NA	NA
1127	B01AC09	epoprostenol	Antithrombotic	high productivity speech or thought	[0]	NA	NA
1128	B01AC09	epoprostenol	Antithrombotic	incoherence	1.05 (0.55-1.79) [13]	NA	NA
1129	B01AC09	epoprostenol	Antithrombotic	low productivity speech or thought	[1]	NA	NA
1130	B01AC09	epoprostenol	Antithrombotic	motor control or execution	0.85 (0.51-1.34) [19]	NA	NA
1131	B01AC09	epoprostenol	Antithrombotic	phonatory	0.93 (0.7-1.21) [56]	NA	NA
1132	B01AC09	epoprostenol	Antithrombotic	prosody	[0]	NA	NA
1133	B01AC09	epoprostenol	Antithrombotic	reasoning abnormal	[0]	NA	NA
1134	B01AC09	epoprostenol	Antithrombotic	stereotypies	[1]	NA	NA
1135	B01AC11	iloprost	Antithrombotic	aphasia	[3]	NA	NA
1136	B01AC11	iloprost	Antithrombotic	high productivity speech or thought	[0]	NA	NA
1137	B01AC11	iloprost	Antithrombotic	incoherence	[3]	NA	NA
1138	B01AC11	iloprost	Antithrombotic	low productivity speech or thought	[1]	NA	NA
1139	B01AC11	iloprost	Antithrombotic	motor control or execution	[4]	NA	NA
1140	B01AC11	iloprost	Antithrombotic	phonatory	1.24 (0.88-1.7) [39]	NA	NA
1141	B01AC11	iloprost	Antithrombotic	prosody	[0]	NA	NA
1142	B01AC11	iloprost	Antithrombotic	reasoning abnormal	[0]	NA	NA
1143	B01AC11	iloprost	Antithrombotic	stereotypies	[0]	NA	NA
1144	B01AC21	treprostinil	Antithrombotic	aphasia	0.18 (0.11-0.29) [18]	NA	NA
1145	B01AC21	treprostinil	Antithrombotic	high productivity speech or thought	[2]	NA	NA
1146	B01AC21	treprostinil	Antithrombotic	incoherence	0.68 (0.48-0.94) [39]	NA	NA
1147	B01AC21	treprostinil	Antithrombotic	low productivity speech or thought	[2]	NA	NA
1148	B01AC21	treprostinil	Antithrombotic	motor control or execution	0.46 (0.33-0.61) [47]	NA	NA
1149	B01AC21	treprostinil	Antithrombotic	phonatory	1.04 (0.92-1.17) [287]	NA	NA
1150	B01AC21	treprostinil	Antithrombotic	prosody	[0]	NA	NA
1151	B01AC21	treprostinil	Antithrombotic	reasoning abnormal	[0]	NA	NA
1152	B01AC21	treprostinil	Antithrombotic	stereotypies	[0]	NA	NA
1153	B01AC22	prasugrel	Antithrombotic	aphasia	[5]	NA	NA
1154	B01AC22	prasugrel	Antithrombotic	high productivity speech or thought	[0]	NA	NA
1155	B01AC22	prasugrel	Antithrombotic	incoherence	[0]	NA	NA
1156	B01AC22	prasugrel	Antithrombotic	low productivity speech or thought	[0]	NA	NA
1157	B01AC22	prasugrel	Antithrombotic	motor control or execution	[4]	NA	NA
1158	B01AC22	prasugrel	Antithrombotic	phonatory	0.64 (0.32-1.15) [11]	NA	NA
1159	B01AC22	prasugrel	Antithrombotic	prosody	[0]	NA	NA
1160	B01AC22	prasugrel	Antithrombotic	reasoning abnormal	[0]	NA	NA
1161	B01AC22	prasugrel	Antithrombotic	stereotypies	[0]	NA	NA
1162	B01AC23	cilostazol	Antithrombotic	aphasia	2.46 (1.22-4.41) [11]	NA	NA
1163	B01AC23	cilostazol	Antithrombotic	high productivity speech or thought	[1]	NA	NA
1164	B01AC23	cilostazol	Antithrombotic	incoherence	[1]	NA	NA
1165	B01AC23	cilostazol	Antithrombotic	low productivity speech or thought	[0]	NA	NA
1166	B01AC23	cilostazol	Antithrombotic	motor control or execution	4.81 (3.04-7.24) [23]*	NA	NA
1167	B01AC23	cilostazol	Antithrombotic	phonatory	[7]	NA	NA
1168	B01AC23	cilostazol	Antithrombotic	prosody	[0]	NA	NA
1169	B01AC23	cilostazol	Antithrombotic	reasoning abnormal	[0]	NA	NA
1170	B01AC23	cilostazol	Antithrombotic	stereotypies	[1]	NA	NA
1171	B01AC24	ticagrelor	Antithrombotic	aphasia	[7]	NA	NA
1172	B01AC24	ticagrelor	Antithrombotic	high productivity speech or thought	[1]	NA	NA
1173	B01AC24	ticagrelor	Antithrombotic	incoherence	3.08 (1.99-4.56) [25]*	NA	NA
1174	B01AC24	ticagrelor	Antithrombotic	low productivity speech or thought	[3]	NA	NA
1175	B01AC24	ticagrelor	Antithrombotic	motor control or execution	[4]	NA	NA
1176	B01AC24	ticagrelor	Antithrombotic	phonatory	0.88 (0.61-1.23) [35]	NA	NA
1177	B01AC24	ticagrelor	Antithrombotic	prosody	[0]	NA	NA
1178	B01AC24	ticagrelor	Antithrombotic	reasoning abnormal	[0]	NA	NA
1179	B01AC24	ticagrelor	Antithrombotic	stereotypies	[0]	NA	NA
1180	B01AC27	selexipag	Antithrombotic	aphasia	[8]	NA	NA
1181	B01AC27	selexipag	Antithrombotic	high productivity speech or thought	[0]	NA	NA
1182	B01AC27	selexipag	Antithrombotic	incoherence	1.26 (0.67-2.16) [13]	NA	NA
1183	B01AC27	selexipag	Antithrombotic	low productivity speech or thought	[0]	NA	NA
1184	B01AC27	selexipag	Antithrombotic	motor control or execution	1.36 (0.88-2.01) [25]	NA	NA
1185	B01AC27	selexipag	Antithrombotic	phonatory	1.22 (0.93-1.57) [61]	NA	NA
1186	B01AC27	selexipag	Antithrombotic	prosody	[0]	NA	NA
1187	B01AC27	selexipag	Antithrombotic	reasoning abnormal	[0]	NA	NA
1188	B01AC27	selexipag	Antithrombotic	stereotypies	[0]	NA	NA
1189	B01AD02	alteplase	Antithrombotic	aphasia	7.16 (5.57-9.07) [70]*	NA	NA
1190	B01AD02	alteplase	Antithrombotic	high productivity speech or thought	[0]	NA	NA
1191	B01AD02	alteplase	Antithrombotic	incoherence	[1]	NA	NA
1192	B01AD02	alteplase	Antithrombotic	low productivity speech or thought	[1]	NA	NA
1193	B01AD02	alteplase	Antithrombotic	motor control or execution	3.78 (2.7-5.16) [40]*	NA	NA
1194	B01AD02	alteplase	Antithrombotic	phonatory	0.58 (0.34-0.94) [17]	NA	NA
1195	B01AD02	alteplase	Antithrombotic	prosody	[0]	NA	NA
1196	B01AD02	alteplase	Antithrombotic	reasoning abnormal	[0]	NA	NA
1197	B01AD02	alteplase	Antithrombotic	stereotypies	[0]	NA	NA
1198	B01AD12	protein c	Antithrombotic	aphasia	[7]	NA	NA
1199	B01AD12	protein c	Antithrombotic	high productivity speech or thought	[0]	NA	NA
1200	B01AD12	protein c	Antithrombotic	incoherence	[0]	NA	NA
1201	B01AD12	protein c	Antithrombotic	low productivity speech or thought	[0]	NA	NA
1202	B01AD12	protein c	Antithrombotic	motor control or execution	[2]	NA	NA
1203	B01AD12	protein c	Antithrombotic	phonatory	[0]	NA	NA
1204	B01AD12	protein c	Antithrombotic	prosody	[0]	NA	NA
1205	B01AD12	protein c	Antithrombotic	reasoning abnormal	[0]	NA	NA
1206	B01AD12	protein c	Antithrombotic	stereotypies	[0]	NA	NA
1207	B01AE07	dabigatran	Antithrombotic	aphasia	4.02 (3.54-4.56) [255]*	[5]	NA
1208	B01AE07	dabigatran	Antithrombotic	high productivity speech or thought	[5]	[2]	NA
1209	B01AE07	dabigatran	Antithrombotic	incoherence	0.64 (0.41-0.94) [25]	[2]	NA
1210	B01AE07	dabigatran	Antithrombotic	low productivity speech or thought	[6]	[0]	NA
1211	B01AE07	dabigatran	Antithrombotic	motor control or execution	2.29 (1.94-2.68) [158]*	[4]	NA
1212	B01AE07	dabigatran	Antithrombotic	phonatory	0.55 (0.45-0.67) [105]	[2]	NA
1213	B01AE07	dabigatran	Antithrombotic	prosody	[0]	[0]	NA
1214	B01AE07	dabigatran	Antithrombotic	reasoning abnormal	[0]	[0]	NA
1215	B01AE07	dabigatran	Antithrombotic	stereotypies	[2]	[0]	NA
1216	B01AF01	rivaroxaban	Antithrombotic	aphasia	1.85 (1.61-2.12) [217]*	[5]	[2]
1217	B01AF01	rivaroxaban	Antithrombotic	high productivity speech or thought	[4]	[0]	[1]
1218	B01AF01	rivaroxaban	Antithrombotic	incoherence	0.67 (0.49-0.89) [48]	[6]	[0]
1219	B01AF01	rivaroxaban	Antithrombotic	low productivity speech or thought	0.89 (0.5-1.48) [15]	[2]	[1]
1220	B01AF01	rivaroxaban	Antithrombotic	motor control or execution	1.26 (1.07-1.47) [160]	[8]	[3]
1221	B01AF01	rivaroxaban	Antithrombotic	phonatory	0.38 (0.32-0.45) [135]	[4]	[0]
1222	B01AF01	rivaroxaban	Antithrombotic	prosody	[0]	[0]	[0]
1223	B01AF01	rivaroxaban	Antithrombotic	reasoning abnormal	[0]	[0]	[0]
1224	B01AF01	rivaroxaban	Antithrombotic	stereotypies	[0]	[0]	[1]
1225	B01AF02	apixaban	Antithrombotic	aphasia	1.42 (1.19-1.68) [138]	[9]	[0]
1226	B01AF02	apixaban	Antithrombotic	high productivity speech or thought	[8]	[1]	[2]
1227	B01AF02	apixaban	Antithrombotic	incoherence	0.9 (0.67-1.18) [53]	[2]	[1]
1228	B01AF02	apixaban	Antithrombotic	low productivity speech or thought	[9]	[0]	[0]
1229	B01AF02	apixaban	Antithrombotic	motor control or execution	1.13 (0.94-1.36) [119]	[5]	[5]
1230	B01AF02	apixaban	Antithrombotic	phonatory	0.67 (0.58-0.78) [194]	[7]	[0]
1231	B01AF02	apixaban	Antithrombotic	prosody	[0]	[0]	[0]
1232	B01AF02	apixaban	Antithrombotic	reasoning abnormal	[0]	[0]	[0]
1233	B01AF02	apixaban	Antithrombotic	stereotypies	[3]	[0]	[0]
1234	B01AF03	edoxaban	Antithrombotic	aphasia	2.43 (1.36-4.01) [15]	NA	NA
1235	B01AF03	edoxaban	Antithrombotic	high productivity speech or thought	[0]	NA	NA
1236	B01AF03	edoxaban	Antithrombotic	incoherence	[0]	NA	NA
1237	B01AF03	edoxaban	Antithrombotic	low productivity speech or thought	[1]	NA	NA
1238	B01AF03	edoxaban	Antithrombotic	motor control or execution	[9]	NA	NA
1239	B01AF03	edoxaban	Antithrombotic	phonatory	[3]	NA	NA
1240	B01AF03	edoxaban	Antithrombotic	prosody	[0]	NA	NA
1241	B01AF03	edoxaban	Antithrombotic	reasoning abnormal	[0]	NA	NA
1242	B01AF03	edoxaban	Antithrombotic	stereotypies	[0]	NA	NA
1243	B01AX05	fondaparinux	Antithrombotic	aphasia	2.88 (1.7-4.56) [18]	NA	NA
1244	B01AX05	fondaparinux	Antithrombotic	high productivity speech or thought	[0]	NA	NA
1245	B01AX05	fondaparinux	Antithrombotic	incoherence	[1]	NA	NA
1246	B01AX05	fondaparinux	Antithrombotic	low productivity speech or thought	[3]	NA	NA
1247	B01AX05	fondaparinux	Antithrombotic	motor control or execution	1.63 (0.81-2.93) [11]	NA	NA
1248	B01AX05	fondaparinux	Antithrombotic	phonatory	[6]	NA	NA
1249	B01AX05	fondaparinux	Antithrombotic	prosody	[0]	NA	NA
1250	B01AX05	fondaparinux	Antithrombotic	reasoning abnormal	[0]	NA	NA
1251	B01AX05	fondaparinux	Antithrombotic	stereotypies	[0]	NA	NA
1252	B02AA02	tranexamic acid	Antifibrinolytics	aphasia	2.85 (1.47-4.99) [12]	NA	NA
1253	B02AA02	tranexamic acid	Antifibrinolytics	high productivity speech or thought	[0]	NA	NA
1254	B02AA02	tranexamic acid	Antifibrinolytics	incoherence	[1]	NA	NA
1255	B02AA02	tranexamic acid	Antifibrinolytics	low productivity speech or thought	[0]	NA	NA
1256	B02AA02	tranexamic acid	Antifibrinolytics	motor control or execution	[5]	NA	NA
1257	B02AA02	tranexamic acid	Antifibrinolytics	phonatory	1.13 (0.62-1.91) [14]	NA	NA
1258	B02AA02	tranexamic acid	Antifibrinolytics	prosody	[0]	NA	NA
1259	B02AA02	tranexamic acid	Antifibrinolytics	reasoning abnormal	[0]	NA	NA
1260	B02AA02	tranexamic acid	Antifibrinolytics	stereotypies	[0]	NA	NA
1261	B02AB02	alpha-1-antitrypsin	Antifibrinolytics	aphasia	[3]	NA	NA
1262	B02AB02	alpha-1-antitrypsin	Antifibrinolytics	high productivity speech or thought	[0]	NA	NA
1263	B02AB02	alpha-1-antitrypsin	Antifibrinolytics	incoherence	[3]	NA	NA
1264	B02AB02	alpha-1-antitrypsin	Antifibrinolytics	low productivity speech or thought	[0]	NA	NA
1265	B02AB02	alpha-1-antitrypsin	Antifibrinolytics	motor control or execution	[1]	NA	NA
1266	B02AB02	alpha-1-antitrypsin	Antifibrinolytics	phonatory	0.81 (0.39-1.5) [10]	NA	NA
1267	B02AB02	alpha-1-antitrypsin	Antifibrinolytics	prosody	[0]	NA	NA
1268	B02AB02	alpha-1-antitrypsin	Antifibrinolytics	reasoning abnormal	[0]	NA	NA
1269	B02AB02	alpha-1-antitrypsin	Antifibrinolytics	stereotypies	[0]	NA	NA
1270	B02BA01	phytomenadione	Vitamin K and other hemostatics	aphasia	[8]	[2]	NA
1271	B02BA01	phytomenadione	Vitamin K and other hemostatics	high productivity speech or thought	[2]	[2]	NA
1272	B02BA01	phytomenadione	Vitamin K and other hemostatics	incoherence	[3]	[1]	NA
1273	B02BA01	phytomenadione	Vitamin K and other hemostatics	low productivity speech or thought	[0]	[0]	NA
1274	B02BA01	phytomenadione	Vitamin K and other hemostatics	motor control or execution	1.49 (0.71-2.74) [10]	[1]	NA
1275	B02BA01	phytomenadione	Vitamin K and other hemostatics	phonatory	1.48 (0.97-2.16) [27]	[1]	NA
1276	B02BA01	phytomenadione	Vitamin K and other hemostatics	prosody	[0]	[0]	NA
1277	B02BA01	phytomenadione	Vitamin K and other hemostatics	reasoning abnormal	[0]	[0]	NA
1278	B02BA01	phytomenadione	Vitamin K and other hemostatics	stereotypies	[0]	[0]	NA
1279	B02BD02	factor viii	Vitamin K and other hemostatics	aphasia	[2]	NA	NA
1280	B02BD02	factor viii	Vitamin K and other hemostatics	high productivity speech or thought	[1]	NA	NA
1281	B02BD02	factor viii	Vitamin K and other hemostatics	incoherence	[1]	NA	NA
1282	B02BD02	factor viii	Vitamin K and other hemostatics	low productivity speech or thought	[0]	NA	NA
1283	B02BD02	factor viii	Vitamin K and other hemostatics	motor control or execution	[6]	NA	NA
1284	B02BD02	factor viii	Vitamin K and other hemostatics	phonatory	0.25 (0.12-0.47) [10]	NA	NA
1285	B02BD02	factor viii	Vitamin K and other hemostatics	prosody	[0]	NA	NA
1286	B02BD02	factor viii	Vitamin K and other hemostatics	reasoning abnormal	[0]	NA	NA
1287	B02BD02	factor viii	Vitamin K and other hemostatics	stereotypies	[0]	NA	NA
1288	B02BD04	factor ix	Vitamin K and other hemostatics	aphasia	[8]	NA	NA
1289	B02BD04	factor ix	Vitamin K and other hemostatics	high productivity speech or thought	[0]	NA	NA
1290	B02BD04	factor ix	Vitamin K and other hemostatics	incoherence	[0]	NA	NA
1291	B02BD04	factor ix	Vitamin K and other hemostatics	low productivity speech or thought	[0]	NA	NA
1292	B02BD04	factor ix	Vitamin K and other hemostatics	motor control or execution	[2]	NA	NA
1293	B02BD04	factor ix	Vitamin K and other hemostatics	phonatory	[8]	NA	NA
1294	B02BD04	factor ix	Vitamin K and other hemostatics	prosody	[0]	NA	NA
1295	B02BD04	factor ix	Vitamin K and other hemostatics	reasoning abnormal	[0]	NA	NA
1296	B02BD04	factor ix	Vitamin K and other hemostatics	stereotypies	[0]	NA	NA
1297	B02BD05	factor vii (proconvertin)	Vitamin K and other hemostatics	aphasia	[7]	NA	NA
1298	B02BD05	factor vii (proconvertin)	Vitamin K and other hemostatics	high productivity speech or thought	[0]	NA	NA
1299	B02BD05	factor vii (proconvertin)	Vitamin K and other hemostatics	incoherence	[0]	NA	NA
1300	B02BD05	factor vii (proconvertin)	Vitamin K and other hemostatics	low productivity speech or thought	[0]	NA	NA
1301	B02BD05	factor vii (proconvertin)	Vitamin K and other hemostatics	motor control or execution	[2]	NA	NA
1302	B02BD05	factor vii (proconvertin)	Vitamin K and other hemostatics	phonatory	[0]	NA	NA
1303	B02BD05	factor vii (proconvertin)	Vitamin K and other hemostatics	prosody	[0]	NA	NA
1304	B02BD05	factor vii (proconvertin)	Vitamin K and other hemostatics	reasoning abnormal	[0]	NA	NA
1305	B02BD05	factor vii (proconvertin)	Vitamin K and other hemostatics	stereotypies	[0]	NA	NA
1306	B02BD13	factor x (stuart prower factor)	Vitamin K and other hemostatics	aphasia	[7]	NA	NA
1307	B02BD13	factor x (stuart prower factor)	Vitamin K and other hemostatics	high productivity speech or thought	[0]	NA	NA
1308	B02BD13	factor x (stuart prower factor)	Vitamin K and other hemostatics	incoherence	[0]	NA	NA
1309	B02BD13	factor x (stuart prower factor)	Vitamin K and other hemostatics	low productivity speech or thought	[0]	NA	NA
1310	B02BD13	factor x (stuart prower factor)	Vitamin K and other hemostatics	motor control or execution	[2]	NA	NA
1311	B02BD13	factor x (stuart prower factor)	Vitamin K and other hemostatics	phonatory	[1]	NA	NA
1312	B02BD13	factor x (stuart prower factor)	Vitamin K and other hemostatics	prosody	[0]	NA	NA
1313	B02BD13	factor x (stuart prower factor)	Vitamin K and other hemostatics	reasoning abnormal	[0]	NA	NA
1314	B02BD13	factor x (stuart prower factor)	Vitamin K and other hemostatics	stereotypies	[0]	NA	NA
1315	B02BX04	romiplostim	Vitamin K and other hemostatics	aphasia	[4]	NA	NA
1316	B02BX04	romiplostim	Vitamin K and other hemostatics	high productivity speech or thought	[1]	NA	NA
1317	B02BX04	romiplostim	Vitamin K and other hemostatics	incoherence	[3]	NA	NA
1318	B02BX04	romiplostim	Vitamin K and other hemostatics	low productivity speech or thought	[0]	NA	NA
1319	B02BX04	romiplostim	Vitamin K and other hemostatics	motor control or execution	0.79 (0.39-1.43) [11]	NA	NA
1320	B02BX04	romiplostim	Vitamin K and other hemostatics	phonatory	[8]	NA	NA
1321	B02BX04	romiplostim	Vitamin K and other hemostatics	prosody	[0]	NA	NA
1322	B02BX04	romiplostim	Vitamin K and other hemostatics	reasoning abnormal	[0]	NA	NA
1323	B02BX04	romiplostim	Vitamin K and other hemostatics	stereotypies	[0]	NA	NA
1324	B02BX05	eltrombopag	Vitamin K and other hemostatics	aphasia	0.65 (0.32-1.16) [11]	NA	NA
1325	B02BX05	eltrombopag	Vitamin K and other hemostatics	high productivity speech or thought	[0]	NA	NA
1326	B02BX05	eltrombopag	Vitamin K and other hemostatics	incoherence	[5]	NA	NA
1327	B02BX05	eltrombopag	Vitamin K and other hemostatics	low productivity speech or thought	[1]	NA	NA
1328	B02BX05	eltrombopag	Vitamin K and other hemostatics	motor control or execution	0.77 (0.42-1.29) [14]	NA	NA
1329	B02BX05	eltrombopag	Vitamin K and other hemostatics	phonatory	0.46 (0.29-0.69) [23]	NA	NA
1330	B02BX05	eltrombopag	Vitamin K and other hemostatics	prosody	[0]	NA	NA
1331	B02BX05	eltrombopag	Vitamin K and other hemostatics	reasoning abnormal	[0]	NA	NA
1332	B02BX05	eltrombopag	Vitamin K and other hemostatics	stereotypies	[0]	NA	NA
1333	B03BA01	cyanocobalamin	Vitamin B12 and folic acid	aphasia	1.26 (0.85-1.81) [30]	[4]	[1]
1334	B03BA01	cyanocobalamin	Vitamin B12 and folic acid	high productivity speech or thought	[5]	0.83 (0.41-1.5) [11]	[3]
1335	B03BA01	cyanocobalamin	Vitamin B12 and folic acid	incoherence	1.54 (0.96-2.34) [22]	0.67 (0.38-1.1) [16]	[5]
1336	B03BA01	cyanocobalamin	Vitamin B12 and folic acid	low productivity speech or thought	[5]	[4]	[0]
1337	B03BA01	cyanocobalamin	Vitamin B12 and folic acid	motor control or execution	1.77 (1.29-2.37) [45]	1.03 (0.66-1.54) [24]	2.99 (1.65-5) [15]
1338	B03BA01	cyanocobalamin	Vitamin B12 and folic acid	phonatory	1.49 (1.21-1.81) [103]	2.13 (1.36-3.2) [24]	[2]
1339	B03BA01	cyanocobalamin	Vitamin B12 and folic acid	prosody	[0]	[0]	[0]
1340	B03BA01	cyanocobalamin	Vitamin B12 and folic acid	reasoning abnormal	[1]	[1]	[0]
1341	B03BA01	cyanocobalamin	Vitamin B12 and folic acid	stereotypies	[2]	[0]	[0]
1342	B03BA05	mecobalamin	Vitamin B12 and folic acid	aphasia	[6]	NA	NA
1343	B03BA05	mecobalamin	Vitamin B12 and folic acid	high productivity speech or thought	[1]	NA	NA
1344	B03BA05	mecobalamin	Vitamin B12 and folic acid	incoherence	[1]	NA	NA
1345	B03BA05	mecobalamin	Vitamin B12 and folic acid	low productivity speech or thought	[1]	NA	NA
1346	B03BA05	mecobalamin	Vitamin B12 and folic acid	motor control or execution	2.89 (1.44-5.18) [11]	NA	NA
1347	B03BA05	mecobalamin	Vitamin B12 and folic acid	phonatory	[7]	NA	NA
1348	B03BA05	mecobalamin	Vitamin B12 and folic acid	prosody	[0]	NA	NA
1349	B03BA05	mecobalamin	Vitamin B12 and folic acid	reasoning abnormal	[0]	NA	NA
1350	B03BA05	mecobalamin	Vitamin B12 and folic acid	stereotypies	[0]	NA	NA
1351	B03BB01	folic acid	Vitamin B12 and folic acid	aphasia	1.18 (0.99-1.4) [136]	0.86 (0.61-1.19) [39]	[6]
1352	B03BB01	folic acid	Vitamin B12 and folic acid	high productivity speech or thought	[8]	0.24 (0.13-0.42) [13]	[5]
1353	B03BB01	folic acid	Vitamin B12 and folic acid	incoherence	0.62 (0.44-0.83) [43]	0.34 (0.23-0.49) [33]	1.14 (0.62-1.93) [14]
1354	B03BB01	folic acid	Vitamin B12 and folic acid	low productivity speech or thought	0.86 (0.47-1.45) [14]	[5]	[0]
1355	B03BB01	folic acid	Vitamin B12 and folic acid	motor control or execution	0.85 (0.69-1.03) [105]	0.57 (0.42-0.75) [53]	1.31 (0.81-2.03) [21]
1356	B03BB01	folic acid	Vitamin B12 and folic acid	phonatory	1.09 (0.98-1.21) [367]	1.32 (0.99-1.72) [58]	[6]
1357	B03BB01	folic acid	Vitamin B12 and folic acid	prosody	[0]	[0]	[0]
1358	B03BB01	folic acid	Vitamin B12 and folic acid	reasoning abnormal	[0]	[1]	[1]
1359	B03BB01	folic acid	Vitamin B12 and folic acid	stereotypies	[0]	[0]	[0]
1360	B03XA01	erythropoietin	Other antianemic	aphasia	0.8 (0.49-1.24) [20]	NA	NA
1361	B03XA01	erythropoietin	Other antianemic	high productivity speech or thought	[4]	NA	NA
1362	B03XA01	erythropoietin	Other antianemic	incoherence	0.73 (0.36-1.32) [11]	NA	NA
1363	B03XA01	erythropoietin	Other antianemic	low productivity speech or thought	[4]	NA	NA
1364	B03XA01	erythropoietin	Other antianemic	motor control or execution	1.01 (0.66-1.47) [27]	NA	NA
1365	B03XA01	erythropoietin	Other antianemic	phonatory	0.66 (0.48-0.87) [48]	NA	NA
1366	B03XA01	erythropoietin	Other antianemic	prosody	[0]	NA	NA
1367	B03XA01	erythropoietin	Other antianemic	reasoning abnormal	[0]	NA	NA
1368	B03XA01	erythropoietin	Other antianemic	stereotypies	[1]	NA	NA
1369	B03XA02	darbepoetin alfa	Other antianemic	aphasia	0.4 (0.22-0.66) [15]	NA	NA
1370	B03XA02	darbepoetin alfa	Other antianemic	high productivity speech or thought	[0]	NA	NA
1371	B03XA02	darbepoetin alfa	Other antianemic	incoherence	[5]	NA	NA
1372	B03XA02	darbepoetin alfa	Other antianemic	low productivity speech or thought	[2]	NA	NA
1373	B03XA02	darbepoetin alfa	Other antianemic	motor control or execution	0.42 (0.24-0.67) [17]	NA	NA
1374	B03XA02	darbepoetin alfa	Other antianemic	phonatory	0.21 (0.14-0.32) [24]	NA	NA
1375	B03XA02	darbepoetin alfa	Other antianemic	prosody	[0]	NA	NA
1376	B03XA02	darbepoetin alfa	Other antianemic	reasoning abnormal	[0]	NA	NA
1377	B03XA02	darbepoetin alfa	Other antianemic	stereotypies	[0]	NA	NA
1378	B03XA03	methoxy polyethylene glycol-epoetin beta	Other antianemic	aphasia	[2]	NA	NA
1379	B03XA03	methoxy polyethylene glycol-epoetin beta	Other antianemic	high productivity speech or thought	[0]	NA	NA
1380	B03XA03	methoxy polyethylene glycol-epoetin beta	Other antianemic	incoherence	[2]	NA	NA
1381	B03XA03	methoxy polyethylene glycol-epoetin beta	Other antianemic	low productivity speech or thought	[1]	NA	NA
1382	B03XA03	methoxy polyethylene glycol-epoetin beta	Other antianemic	motor control or execution	[5]	NA	NA
1383	B03XA03	methoxy polyethylene glycol-epoetin beta	Other antianemic	phonatory	[4]	NA	NA
1384	B03XA03	methoxy polyethylene glycol-epoetin beta	Other antianemic	prosody	[0]	NA	NA
1385	B03XA03	methoxy polyethylene glycol-epoetin beta	Other antianemic	reasoning abnormal	[0]	NA	NA
1386	B03XA03	methoxy polyethylene glycol-epoetin beta	Other antianemic	stereotypies	[0]	NA	NA
1387	B06AC01	c1-inhibitor, plasma derived	Other hematological	aphasia	[3]	NA	NA
1388	B06AC01	c1-inhibitor, plasma derived	Other hematological	high productivity speech or thought	[0]	NA	NA
1389	B06AC01	c1-inhibitor, plasma derived	Other hematological	incoherence	[4]	NA	NA
1390	B06AC01	c1-inhibitor, plasma derived	Other hematological	low productivity speech or thought	[0]	NA	NA
1391	B06AC01	c1-inhibitor, plasma derived	Other hematological	motor control or execution	[6]	NA	NA
1392	B06AC01	c1-inhibitor, plasma derived	Other hematological	phonatory	1.1 (0.71-1.61) [26]	NA	NA
1393	B06AC01	c1-inhibitor, plasma derived	Other hematological	prosody	[0]	NA	NA
1394	B06AC01	c1-inhibitor, plasma derived	Other hematological	reasoning abnormal	[0]	NA	NA
1395	B06AC01	c1-inhibitor, plasma derived	Other hematological	stereotypies	[0]	NA	NA
1396	B06AC02	icatibant	Other hematological	aphasia	[1]	NA	NA
1397	B06AC02	icatibant	Other hematological	high productivity speech or thought	[0]	NA	NA
1398	B06AC02	icatibant	Other hematological	incoherence	[1]	NA	NA
1399	B06AC02	icatibant	Other hematological	low productivity speech or thought	[0]	NA	NA
1400	B06AC02	icatibant	Other hematological	motor control or execution	[5]	NA	NA
1401	B06AC02	icatibant	Other hematological	phonatory	2.39 (1.57-3.49) [27]	NA	NA
1402	B06AC02	icatibant	Other hematological	prosody	[0]	NA	NA
1403	B06AC02	icatibant	Other hematological	reasoning abnormal	[0]	NA	NA
1404	B06AC02	icatibant	Other hematological	stereotypies	[0]	NA	NA
1405	B06AC03	ecallantide	Other hematological	aphasia	[0]	NA	NA
1406	B06AC03	ecallantide	Other hematological	high productivity speech or thought	[0]	NA	NA
1407	B06AC03	ecallantide	Other hematological	incoherence	[0]	NA	NA
1408	B06AC03	ecallantide	Other hematological	low productivity speech or thought	[0]	NA	NA
1409	B06AC03	ecallantide	Other hematological	motor control or execution	[1]	NA	NA
1410	B06AC03	ecallantide	Other hematological	phonatory	2.81 (1.4-5.06) [11]	NA	NA
1411	B06AC03	ecallantide	Other hematological	prosody	[0]	NA	NA
1412	B06AC03	ecallantide	Other hematological	reasoning abnormal	[0]	NA	NA
1413	B06AC03	ecallantide	Other hematological	stereotypies	[0]	NA	NA
1414	C01AA04	digitoxin	Cardiac glycosides	aphasia	[8]	NA	NA
1415	C01AA04	digitoxin	Cardiac glycosides	high productivity speech or thought	[0]	NA	NA
1416	C01AA04	digitoxin	Cardiac glycosides	incoherence	[0]	NA	NA
1417	C01AA04	digitoxin	Cardiac glycosides	low productivity speech or thought	[0]	NA	NA
1418	C01AA04	digitoxin	Cardiac glycosides	motor control or execution	[2]	NA	NA
1419	C01AA04	digitoxin	Cardiac glycosides	phonatory	[0]	NA	NA
1420	C01AA04	digitoxin	Cardiac glycosides	prosody	[0]	NA	NA
1421	C01AA04	digitoxin	Cardiac glycosides	reasoning abnormal	[0]	NA	NA
1422	C01AA04	digitoxin	Cardiac glycosides	stereotypies	[0]	NA	NA
1423	C01AA05	digoxin	Cardiac glycosides	aphasia	1.94 (1.52-2.43) [75]*	2.45 (1.39-4.01) [16]	[1]
1424	C01AA05	digoxin	Cardiac glycosides	high productivity speech or thought	[4]	[3]	[0]
1425	C01AA05	digoxin	Cardiac glycosides	incoherence	1.63 (1.15-2.24) [38]	[9]	[0]
1426	C01AA05	digoxin	Cardiac glycosides	low productivity speech or thought	[3]	[5]	[0]
1427	C01AA05	digoxin	Cardiac glycosides	motor control or execution	1.66 (1.29-2.1) [69]	[8]	[5]
1428	C01AA05	digoxin	Cardiac glycosides	phonatory	1.09 (0.91-1.3) [124]	1.53 (0.73-2.83) [10]	[1]
1429	C01AA05	digoxin	Cardiac glycosides	prosody	[0]	[0]	[0]
1430	C01AA05	digoxin	Cardiac glycosides	reasoning abnormal	[2]	[0]	[0]
1431	C01AA05	digoxin	Cardiac glycosides	stereotypies	[2]	[0]	[0]
1432	C01BA01	quinidine	Antiarrhythmics I and III	aphasia	[6]	[6]	NA
1433	C01BA01	quinidine	Antiarrhythmics I and III	high productivity speech or thought	[2]	[2]	NA
1434	C01BA01	quinidine	Antiarrhythmics I and III	incoherence	[4]	[1]	NA
1435	C01BA01	quinidine	Antiarrhythmics I and III	low productivity speech or thought	[1]	[0]	NA
1436	C01BA01	quinidine	Antiarrhythmics I and III	motor control or execution	[8]	7.52 (3.53-14.21) [10]*	NA
1437	C01BA01	quinidine	Antiarrhythmics I and III	phonatory	[1]	[2]	NA
1438	C01BA01	quinidine	Antiarrhythmics I and III	prosody	[0]	[0]	NA
1439	C01BA01	quinidine	Antiarrhythmics I and III	reasoning abnormal	[0]	[0]	NA
1440	C01BA01	quinidine	Antiarrhythmics I and III	stereotypies	[2]	[0]	NA
1441	C01BA03	disopyramide	Antiarrhythmics I and III	aphasia	[1]	NA	NA
1442	C01BA03	disopyramide	Antiarrhythmics I and III	high productivity speech or thought	[0]	NA	NA
1443	C01BA03	disopyramide	Antiarrhythmics I and III	incoherence	[0]	NA	NA
1444	C01BA03	disopyramide	Antiarrhythmics I and III	low productivity speech or thought	[0]	NA	NA
1445	C01BA03	disopyramide	Antiarrhythmics I and III	motor control or execution	[3]	NA	NA
1446	C01BA03	disopyramide	Antiarrhythmics I and III	phonatory	[3]	NA	NA
1447	C01BA03	disopyramide	Antiarrhythmics I and III	prosody	[0]	NA	NA
1448	C01BA03	disopyramide	Antiarrhythmics I and III	reasoning abnormal	[0]	NA	NA
1449	C01BA03	disopyramide	Antiarrhythmics I and III	stereotypies	[0]	NA	NA
1450	C01BC03	propafenone	Antiarrhythmics I and III	aphasia	2.16 (1.07-3.88) [11]	NA	NA
1451	C01BC03	propafenone	Antiarrhythmics I and III	high productivity speech or thought	[0]	NA	NA
1452	C01BC03	propafenone	Antiarrhythmics I and III	incoherence	[5]	NA	NA
1453	C01BC03	propafenone	Antiarrhythmics I and III	low productivity speech or thought	[1]	NA	NA
1454	C01BC03	propafenone	Antiarrhythmics I and III	motor control or execution	[5]	NA	NA
1455	C01BC03	propafenone	Antiarrhythmics I and III	phonatory	1.28 (0.77-2) [19]	NA	NA
1456	C01BC03	propafenone	Antiarrhythmics I and III	prosody	[0]	NA	NA
1457	C01BC03	propafenone	Antiarrhythmics I and III	reasoning abnormal	[0]	NA	NA
1458	C01BC03	propafenone	Antiarrhythmics I and III	stereotypies	[0]	NA	NA
1459	C01BC04	flecainide	Antiarrhythmics I and III	aphasia	1.25 (0.6-2.31) [10]	NA	NA
1460	C01BC04	flecainide	Antiarrhythmics I and III	high productivity speech or thought	[1]	NA	NA
1461	C01BC04	flecainide	Antiarrhythmics I and III	incoherence	[4]	NA	NA
1462	C01BC04	flecainide	Antiarrhythmics I and III	low productivity speech or thought	[2]	NA	NA
1463	C01BC04	flecainide	Antiarrhythmics I and III	motor control or execution	2.22 (1.33-3.48) [19]	NA	NA
1464	C01BC04	flecainide	Antiarrhythmics I and III	phonatory	0.98 (0.62-1.48) [23]	NA	NA
1465	C01BC04	flecainide	Antiarrhythmics I and III	prosody	[0]	NA	NA
1466	C01BC04	flecainide	Antiarrhythmics I and III	reasoning abnormal	[0]	NA	NA
1467	C01BC04	flecainide	Antiarrhythmics I and III	stereotypies	[0]	NA	NA
1468	C01BD01	amiodarone	Antiarrhythmics I and III	aphasia	1.49 (1.12-1.96) [53]	2.89 (1.57-4.88) [14]	NA
1469	C01BD01	amiodarone	Antiarrhythmics I and III	high productivity speech or thought	[2]	[4]	NA
1470	C01BD01	amiodarone	Antiarrhythmics I and III	incoherence	0.6 (0.32-1.04) [13]	[4]	NA
1471	C01BD01	amiodarone	Antiarrhythmics I and III	low productivity speech or thought	[7]	[3]	NA
1472	C01BD01	amiodarone	Antiarrhythmics I and III	motor control or execution	1.52 (1.15-1.97) [58]	[6]	NA
1473	C01BD01	amiodarone	Antiarrhythmics I and III	phonatory	0.74 (0.58-0.92) [77]	[2]	NA
1474	C01BD01	amiodarone	Antiarrhythmics I and III	prosody	[0]	[0]	NA
1475	C01BD01	amiodarone	Antiarrhythmics I and III	reasoning abnormal	[1]	[0]	NA
1476	C01BD01	amiodarone	Antiarrhythmics I and III	stereotypies	[0]	[0]	NA
1477	C01BD04	dofetilide	Antiarrhythmics I and III	aphasia	[1]	NA	NA
1478	C01BD04	dofetilide	Antiarrhythmics I and III	high productivity speech or thought	[2]	NA	NA
1479	C01BD04	dofetilide	Antiarrhythmics I and III	incoherence	[6]	NA	NA
1480	C01BD04	dofetilide	Antiarrhythmics I and III	low productivity speech or thought	[2]	NA	NA
1481	C01BD04	dofetilide	Antiarrhythmics I and III	motor control or execution	[4]	NA	NA
1482	C01BD04	dofetilide	Antiarrhythmics I and III	phonatory	1.31 (0.88-1.89) [29]	NA	NA
1483	C01BD04	dofetilide	Antiarrhythmics I and III	prosody	[0]	NA	NA
1484	C01BD04	dofetilide	Antiarrhythmics I and III	reasoning abnormal	[0]	NA	NA
1485	C01BD04	dofetilide	Antiarrhythmics I and III	stereotypies	[0]	NA	NA
1486	C01BD07	dronedarone	Antiarrhythmics I and III	aphasia	[6]	NA	NA
1487	C01BD07	dronedarone	Antiarrhythmics I and III	high productivity speech or thought	[1]	NA	NA
1488	C01BD07	dronedarone	Antiarrhythmics I and III	incoherence	[3]	NA	NA
1489	C01BD07	dronedarone	Antiarrhythmics I and III	low productivity speech or thought	[3]	NA	NA
1490	C01BD07	dronedarone	Antiarrhythmics I and III	motor control or execution	1.36 (0.68-2.44) [11]	NA	NA
1491	C01BD07	dronedarone	Antiarrhythmics I and III	phonatory	0.72 (0.41-1.18) [16]	NA	NA
1492	C01BD07	dronedarone	Antiarrhythmics I and III	prosody	[0]	NA	NA
1493	C01BD07	dronedarone	Antiarrhythmics I and III	reasoning abnormal	[0]	NA	NA
1494	C01BD07	dronedarone	Antiarrhythmics I and III	stereotypies	[0]	NA	NA
1495	C01CA06	phenylephrine	Cardiac stimulants	aphasia	[6]	[1]	NA
1496	C01CA06	phenylephrine	Cardiac stimulants	high productivity speech or thought	[3]	[4]	NA
1497	C01CA06	phenylephrine	Cardiac stimulants	incoherence	[4]	[3]	NA
1498	C01CA06	phenylephrine	Cardiac stimulants	low productivity speech or thought	[1]	[0]	NA
1499	C01CA06	phenylephrine	Cardiac stimulants	motor control or execution	[3]	[1]	NA
1500	C01CA06	phenylephrine	Cardiac stimulants	phonatory	[7]	[0]	NA
1501	C01CA06	phenylephrine	Cardiac stimulants	prosody	[0]	[0]	NA
1502	C01CA06	phenylephrine	Cardiac stimulants	reasoning abnormal	[0]	[1]	NA
1503	C01CA06	phenylephrine	Cardiac stimulants	stereotypies	[0]	[0]	NA
1504	C01CA07	dobutamine	Cardiac stimulants	aphasia	[0]	NA	NA
1505	C01CA07	dobutamine	Cardiac stimulants	high productivity speech or thought	[0]	NA	NA
1506	C01CA07	dobutamine	Cardiac stimulants	incoherence	[0]	NA	NA
1507	C01CA07	dobutamine	Cardiac stimulants	low productivity speech or thought	[0]	NA	NA
1508	C01CA07	dobutamine	Cardiac stimulants	motor control or execution	[4]	NA	NA
1509	C01CA07	dobutamine	Cardiac stimulants	phonatory	[2]	NA	NA
1510	C01CA07	dobutamine	Cardiac stimulants	prosody	[0]	NA	NA
1511	C01CA07	dobutamine	Cardiac stimulants	reasoning abnormal	[0]	NA	NA
1512	C01CA07	dobutamine	Cardiac stimulants	stereotypies	[0]	NA	NA
1513	C01CA17	midodrine	Cardiac stimulants	aphasia	[1]	[1]	[1]
1514	C01CA17	midodrine	Cardiac stimulants	high productivity speech or thought	[1]	[0]	[1]
1515	C01CA17	midodrine	Cardiac stimulants	incoherence	[5]	[4]	[1]
1516	C01CA17	midodrine	Cardiac stimulants	low productivity speech or thought	[0]	[0]	[1]
1517	C01CA17	midodrine	Cardiac stimulants	motor control or execution	[3]	[4]	[4]
1518	C01CA17	midodrine	Cardiac stimulants	phonatory	[4]	[5]	[1]
1519	C01CA17	midodrine	Cardiac stimulants	prosody	[0]	[0]	[0]
1520	C01CA17	midodrine	Cardiac stimulants	reasoning abnormal	[0]	[1]	[1]
1521	C01CA17	midodrine	Cardiac stimulants	stereotypies	[0]	[0]	[0]
1522	C01CA24	epinephrine	Cardiac stimulants	aphasia	[7]	[1]	NA
1523	C01CA24	epinephrine	Cardiac stimulants	high productivity speech or thought	[2]	[0]	NA
1524	C01CA24	epinephrine	Cardiac stimulants	incoherence	[8]	[1]	NA
1525	C01CA24	epinephrine	Cardiac stimulants	low productivity speech or thought	[1]	[0]	NA
1526	C01CA24	epinephrine	Cardiac stimulants	motor control or execution	0.73 (0.38-1.25) [13]	[4]	NA
1527	C01CA24	epinephrine	Cardiac stimulants	phonatory	1.49 (1.16-1.88) [72]	[7]	NA
1528	C01CA24	epinephrine	Cardiac stimulants	prosody	[0]	[0]	NA
1529	C01CA24	epinephrine	Cardiac stimulants	reasoning abnormal	[0]	[0]	NA
1530	C01CA24	epinephrine	Cardiac stimulants	stereotypies	[0]	[0]	NA
1531	C01CA25	amezinium	Cardiac stimulants	aphasia	[0]	NA	NA
1532	C01CA25	amezinium	Cardiac stimulants	high productivity speech or thought	[0]	NA	NA
1533	C01CA25	amezinium	Cardiac stimulants	incoherence	[0]	NA	NA
1534	C01CA25	amezinium	Cardiac stimulants	low productivity speech or thought	[0]	NA	NA
1535	C01CA25	amezinium	Cardiac stimulants	motor control or execution	[6]	NA	NA
1536	C01CA25	amezinium	Cardiac stimulants	phonatory	[0]	NA	NA
1537	C01CA25	amezinium	Cardiac stimulants	prosody	[0]	NA	NA
1538	C01CA25	amezinium	Cardiac stimulants	reasoning abnormal	[0]	NA	NA
1539	C01CA25	amezinium	Cardiac stimulants	stereotypies	[0]	NA	NA
1540	C01CA27	droxidopa	Cardiac stimulants	aphasia	1.2 (0.74-1.84) [21]	NA	NA
1541	C01CA27	droxidopa	Cardiac stimulants	high productivity speech or thought	[4]	NA	NA
1542	C01CA27	droxidopa	Cardiac stimulants	incoherence	3.36 (2.33-4.68) [35]*	NA	NA
1543	C01CA27	droxidopa	Cardiac stimulants	low productivity speech or thought	[8]	NA	NA
1544	C01CA27	droxidopa	Cardiac stimulants	motor control or execution	1.87 (1.3-2.61) [35]	NA	NA
1545	C01CA27	droxidopa	Cardiac stimulants	phonatory	0.66 (0.46-0.93) [34]	NA	NA
1546	C01CA27	droxidopa	Cardiac stimulants	prosody	[0]	NA	NA
1547	C01CA27	droxidopa	Cardiac stimulants	reasoning abnormal	[0]	NA	NA
1548	C01CA27	droxidopa	Cardiac stimulants	stereotypies	[0]	NA	NA
1549	C01DA02	glyceryl trinitrate	Vasodilators	aphasia	1.15 (0.64-1.9) [15]	[7]	[0]
1550	C01DA02	glyceryl trinitrate	Vasodilators	high productivity speech or thought	[1]	[9]	[3]
1551	C01DA02	glyceryl trinitrate	Vasodilators	incoherence	1.28 (0.61-2.36) [10]	0.62 (0.32-1.09) [12]	[2]
1552	C01DA02	glyceryl trinitrate	Vasodilators	low productivity speech or thought	[1]	[5]	[1]
1553	C01DA02	glyceryl trinitrate	Vasodilators	motor control or execution	1.87 (1.22-2.74) [26]	0.79 (0.44-1.31) [15]	[1]
1554	C01DA02	glyceryl trinitrate	Vasodilators	phonatory	1.34 (1-1.77) [51]	1.52 (0.82-2.57) [14]	[2]
1555	C01DA02	glyceryl trinitrate	Vasodilators	prosody	[0]	[0]	[0]
1556	C01DA02	glyceryl trinitrate	Vasodilators	reasoning abnormal	[0]	[0]	[0]
1557	C01DA02	glyceryl trinitrate	Vasodilators	stereotypies	[0]	[0]	[1]
1558	C01DA08	isosorbide	Vasodilators	aphasia	1.51 (0.72-2.79) [10]	[1]	NA
1559	C01DA08	isosorbide	Vasodilators	high productivity speech or thought	[1]	[2]	NA
1560	C01DA08	isosorbide	Vasodilators	incoherence	[2]	[1]	NA
1561	C01DA08	isosorbide	Vasodilators	low productivity speech or thought	[1]	[0]	NA
1562	C01DA08	isosorbide	Vasodilators	motor control or execution	3.26 (2.06-4.9) [23]*	[3]	NA
1563	C01DA08	isosorbide	Vasodilators	phonatory	1.4 (0.92-2.04) [27]	[3]	NA
1564	C01DA08	isosorbide	Vasodilators	prosody	[0]	[0]	NA
1565	C01DA08	isosorbide	Vasodilators	reasoning abnormal	[0]	[0]	NA
1566	C01DA08	isosorbide	Vasodilators	stereotypies	[0]	[0]	NA
1567	C01DA14	isosorbide mononitrate	Vasodilators	aphasia	1.66 (0.9-2.78) [14]	[4]	[0]
1568	C01DA14	isosorbide mononitrate	Vasodilators	high productivity speech or thought	[0]	[0]	[0]
1569	C01DA14	isosorbide mononitrate	Vasodilators	incoherence	2.17 (1.08-3.89) [11]	[2]	[2]
1570	C01DA14	isosorbide mononitrate	Vasodilators	low productivity speech or thought	[3]	[1]	[0]
1571	C01DA14	isosorbide mononitrate	Vasodilators	motor control or execution	[9]	[1]	[2]
1572	C01DA14	isosorbide mononitrate	Vasodilators	phonatory	0.85 (0.52-1.3) [21]	[9]	[1]
1573	C01DA14	isosorbide mononitrate	Vasodilators	prosody	[0]	[0]	[0]
1574	C01DA14	isosorbide mononitrate	Vasodilators	reasoning abnormal	[0]	[0]	[0]
1575	C01DA14	isosorbide mononitrate	Vasodilators	stereotypies	[0]	[0]	[0]
1576	C01DX16	nicorandil	Vasodilators	aphasia	[4]	NA	NA
1577	C01DX16	nicorandil	Vasodilators	high productivity speech or thought	[0]	NA	NA
1578	C01DX16	nicorandil	Vasodilators	incoherence	[0]	NA	NA
1579	C01DX16	nicorandil	Vasodilators	low productivity speech or thought	[0]	NA	NA
1580	C01DX16	nicorandil	Vasodilators	motor control or execution	4.99 (2.48-8.96) [11]	NA	NA
1581	C01DX16	nicorandil	Vasodilators	phonatory	[4]	NA	NA
1582	C01DX16	nicorandil	Vasodilators	prosody	[0]	NA	NA
1583	C01DX16	nicorandil	Vasodilators	reasoning abnormal	[0]	NA	NA
1584	C01DX16	nicorandil	Vasodilators	stereotypies	[0]	NA	NA
1585	C01EA01	alprostadil	Other cardiac	aphasia	[3]	NA	NA
1586	C01EA01	alprostadil	Other cardiac	high productivity speech or thought	[0]	NA	NA
1587	C01EA01	alprostadil	Other cardiac	incoherence	[2]	NA	NA
1588	C01EA01	alprostadil	Other cardiac	low productivity speech or thought	[0]	NA	NA
1589	C01EA01	alprostadil	Other cardiac	motor control or execution	[1]	NA	NA
1590	C01EA01	alprostadil	Other cardiac	phonatory	[1]	NA	NA
1591	C01EA01	alprostadil	Other cardiac	prosody	[0]	NA	NA
1592	C01EA01	alprostadil	Other cardiac	reasoning abnormal	[0]	NA	NA
1593	C01EA01	alprostadil	Other cardiac	stereotypies	[0]	NA	NA
1594	C01EB09	ubidecarenone	Other cardiac	aphasia	1.12 (0.55-2) [11]	[4]	[0]
1595	C01EB09	ubidecarenone	Other cardiac	high productivity speech or thought	[4]	[3]	[0]
1596	C01EB09	ubidecarenone	Other cardiac	incoherence	[9]	[4]	[2]
1597	C01EB09	ubidecarenone	Other cardiac	low productivity speech or thought	[3]	[2]	[1]
1598	C01EB09	ubidecarenone	Other cardiac	motor control or execution	0.94 (0.45-1.74) [10]	[8]	[4]
1599	C01EB09	ubidecarenone	Other cardiac	phonatory	1.99 (1.51-2.59) [57]	[8]	[0]
1600	C01EB09	ubidecarenone	Other cardiac	prosody	[0]	[0]	[0]
1601	C01EB09	ubidecarenone	Other cardiac	reasoning abnormal	[0]	[0]	[0]
1602	C01EB09	ubidecarenone	Other cardiac	stereotypies	[0]	[0]	[0]
1603	C01EB15	trimetazidine	Other cardiac	aphasia	[4]	NA	NA
1604	C01EB15	trimetazidine	Other cardiac	high productivity speech or thought	[0]	NA	NA
1605	C01EB15	trimetazidine	Other cardiac	incoherence	[2]	NA	NA
1606	C01EB15	trimetazidine	Other cardiac	low productivity speech or thought	[0]	NA	NA
1607	C01EB15	trimetazidine	Other cardiac	motor control or execution	[4]	NA	NA
1608	C01EB15	trimetazidine	Other cardiac	phonatory	[6]	NA	NA
1609	C01EB15	trimetazidine	Other cardiac	prosody	[0]	NA	NA
1610	C01EB15	trimetazidine	Other cardiac	reasoning abnormal	[0]	NA	NA
1611	C01EB15	trimetazidine	Other cardiac	stereotypies	[0]	NA	NA
1612	C01EB17	ivabradine	Other cardiac	aphasia	[3]	NA	NA
1613	C01EB17	ivabradine	Other cardiac	high productivity speech or thought	[1]	NA	NA
1614	C01EB17	ivabradine	Other cardiac	incoherence	[1]	NA	NA
1615	C01EB17	ivabradine	Other cardiac	low productivity speech or thought	[0]	NA	NA
1616	C01EB17	ivabradine	Other cardiac	motor control or execution	[3]	NA	NA
1617	C01EB17	ivabradine	Other cardiac	phonatory	[3]	NA	NA
1618	C01EB17	ivabradine	Other cardiac	prosody	[0]	NA	NA
1619	C01EB17	ivabradine	Other cardiac	reasoning abnormal	[0]	NA	NA
1620	C01EB17	ivabradine	Other cardiac	stereotypies	[1]	NA	NA
1621	C01EB18	ranolazine	Other cardiac	aphasia	0.79 (0.38-1.46) [10]	NA	NA
1622	C01EB18	ranolazine	Other cardiac	high productivity speech or thought	[1]	NA	NA
1623	C01EB18	ranolazine	Other cardiac	incoherence	[6]	NA	NA
1624	C01EB18	ranolazine	Other cardiac	low productivity speech or thought	[0]	NA	NA
1625	C01EB18	ranolazine	Other cardiac	motor control or execution	1.71 (1.08-2.57) [23]	NA	NA
1626	C01EB18	ranolazine	Other cardiac	phonatory	0.54 (0.33-0.84) [20]	NA	NA
1627	C01EB18	ranolazine	Other cardiac	prosody	[0]	NA	NA
1628	C01EB18	ranolazine	Other cardiac	reasoning abnormal	[0]	NA	NA
1629	C01EB18	ranolazine	Other cardiac	stereotypies	[0]	NA	NA
1630	C01EB21	regadenoson	Other cardiac	aphasia	3.57 (1.99-5.9) [15]	NA	NA
1631	C01EB21	regadenoson	Other cardiac	high productivity speech or thought	[0]	NA	NA
1632	C01EB21	regadenoson	Other cardiac	incoherence	[5]	NA	NA
1633	C01EB21	regadenoson	Other cardiac	low productivity speech or thought	[0]	NA	NA
1634	C01EB21	regadenoson	Other cardiac	motor control or execution	2.43 (1.21-4.36) [11]	NA	NA
1635	C01EB21	regadenoson	Other cardiac	phonatory	[7]	NA	NA
1636	C01EB21	regadenoson	Other cardiac	prosody	[0]	NA	NA
1637	C01EB21	regadenoson	Other cardiac	reasoning abnormal	[0]	NA	NA
1638	C01EB21	regadenoson	Other cardiac	stereotypies	[0]	NA	NA
1639	C02AB01	methyldopa	Antiadrenergic, centrally acting	aphasia	[5]	NA	NA
1640	C02AB01	methyldopa	Antiadrenergic, centrally acting	high productivity speech or thought	[1]	NA	NA
1641	C02AB01	methyldopa	Antiadrenergic, centrally acting	incoherence	[1]	NA	NA
1642	C02AB01	methyldopa	Antiadrenergic, centrally acting	low productivity speech or thought	[0]	NA	NA
1643	C02AB01	methyldopa	Antiadrenergic, centrally acting	motor control or execution	[5]	NA	NA
1644	C02AB01	methyldopa	Antiadrenergic, centrally acting	phonatory	0.94 (0.45-1.74) [10]	NA	NA
1645	C02AB01	methyldopa	Antiadrenergic, centrally acting	prosody	[0]	NA	NA
1646	C02AB01	methyldopa	Antiadrenergic, centrally acting	reasoning abnormal	[0]	NA	NA
1647	C02AB01	methyldopa	Antiadrenergic, centrally acting	stereotypies	[0]	NA	NA
1648	C02AC02	guanfacine	Antiadrenergic, centrally acting	aphasia	[0]	[1]	NA
1649	C02AC02	guanfacine	Antiadrenergic, centrally acting	high productivity speech or thought	[4]	[5]	NA
1650	C02AC02	guanfacine	Antiadrenergic, centrally acting	incoherence	[5]	[4]	NA
1651	C02AC02	guanfacine	Antiadrenergic, centrally acting	low productivity speech or thought	[1]	[0]	NA
1652	C02AC02	guanfacine	Antiadrenergic, centrally acting	motor control or execution	[6]	[6]	NA
1653	C02AC02	guanfacine	Antiadrenergic, centrally acting	phonatory	[5]	[0]	NA
1654	C02AC02	guanfacine	Antiadrenergic, centrally acting	prosody	[0]	[0]	NA
1655	C02AC02	guanfacine	Antiadrenergic, centrally acting	reasoning abnormal	[0]	[0]	NA
1656	C02AC02	guanfacine	Antiadrenergic, centrally acting	stereotypies	[1]	[0]	NA
1657	C02AC05	moxonidine	Antiadrenergic, centrally acting	aphasia	[7]	NA	NA
1658	C02AC05	moxonidine	Antiadrenergic, centrally acting	high productivity speech or thought	[0]	NA	NA
1659	C02AC05	moxonidine	Antiadrenergic, centrally acting	incoherence	[0]	NA	NA
1660	C02AC05	moxonidine	Antiadrenergic, centrally acting	low productivity speech or thought	[0]	NA	NA
1661	C02AC05	moxonidine	Antiadrenergic, centrally acting	motor control or execution	[4]	NA	NA
1662	C02AC05	moxonidine	Antiadrenergic, centrally acting	phonatory	[2]	NA	NA
1663	C02AC05	moxonidine	Antiadrenergic, centrally acting	prosody	[0]	NA	NA
1664	C02AC05	moxonidine	Antiadrenergic, centrally acting	reasoning abnormal	[0]	NA	NA
1665	C02AC05	moxonidine	Antiadrenergic, centrally acting	stereotypies	[0]	NA	NA
1666	C02CA01	prazosin	Antiadrenergic, peripherically acting	aphasia	[5]	[0]	NA
1667	C02CA01	prazosin	Antiadrenergic, peripherically acting	high productivity speech or thought	[0]	[1]	NA
1668	C02CA01	prazosin	Antiadrenergic, peripherically acting	incoherence	[1]	[8]	NA
1669	C02CA01	prazosin	Antiadrenergic, peripherically acting	low productivity speech or thought	[0]	[0]	NA
1670	C02CA01	prazosin	Antiadrenergic, peripherically acting	motor control or execution	[2]	[7]	NA
1671	C02CA01	prazosin	Antiadrenergic, peripherically acting	phonatory	[3]	[2]	NA
1672	C02CA01	prazosin	Antiadrenergic, peripherically acting	prosody	[0]	[0]	NA
1673	C02CA01	prazosin	Antiadrenergic, peripherically acting	reasoning abnormal	[0]	[0]	NA
1674	C02CA01	prazosin	Antiadrenergic, peripherically acting	stereotypies	[0]	[0]	NA
1675	C02CA04	doxazosin	Antiadrenergic, peripherically acting	aphasia	1.72 (1.12-2.53) [26]	[2]	NA
1676	C02CA04	doxazosin	Antiadrenergic, peripherically acting	high productivity speech or thought	[2]	[3]	NA
1677	C02CA04	doxazosin	Antiadrenergic, peripherically acting	incoherence	[4]	1.69 (0.89-2.91) [13]	NA
1678	C02CA04	doxazosin	Antiadrenergic, peripherically acting	low productivity speech or thought	[1]	[1]	NA
1679	C02CA04	doxazosin	Antiadrenergic, peripherically acting	motor control or execution	2.97 (2.19-3.95) [48]*	[8]	NA
1680	C02CA04	doxazosin	Antiadrenergic, peripherically acting	phonatory	1.08 (0.8-1.44) [48]	[6]	NA
1681	C02CA04	doxazosin	Antiadrenergic, peripherically acting	prosody	[0]	[0]	NA
1682	C02CA04	doxazosin	Antiadrenergic, peripherically acting	reasoning abnormal	[0]	[0]	NA
1683	C02CA04	doxazosin	Antiadrenergic, peripherically acting	stereotypies	[0]	[1]	NA
1684	C02CA06	urapidil	Antiadrenergic, peripherically acting	aphasia	[6]	[0]	NA
1685	C02CA06	urapidil	Antiadrenergic, peripherically acting	high productivity speech or thought	[0]	[0]	NA
1686	C02CA06	urapidil	Antiadrenergic, peripherically acting	incoherence	[0]	[1]	NA
1687	C02CA06	urapidil	Antiadrenergic, peripherically acting	low productivity speech or thought	[1]	[0]	NA
1688	C02CA06	urapidil	Antiadrenergic, peripherically acting	motor control or execution	[4]	[5]	NA
1689	C02CA06	urapidil	Antiadrenergic, peripherically acting	phonatory	[0]	[0]	NA
1690	C02CA06	urapidil	Antiadrenergic, peripherically acting	prosody	[0]	[0]	NA
1691	C02CA06	urapidil	Antiadrenergic, peripherically acting	reasoning abnormal	[0]	[0]	NA
1692	C02CA06	urapidil	Antiadrenergic, peripherically acting	stereotypies	[0]	[0]	NA
1693	C02DB02	hydralazine	Agents acting on arterial smooth muscle	aphasia	1.77 (1.03-2.84) [17]	[0]	NA
1694	C02DB02	hydralazine	Agents acting on arterial smooth muscle	high productivity speech or thought	[1]	[1]	NA
1695	C02DB02	hydralazine	Agents acting on arterial smooth muscle	incoherence	1.73 (0.83-3.2) [10]	[2]	NA
1696	C02DB02	hydralazine	Agents acting on arterial smooth muscle	low productivity speech or thought	[2]	[0]	NA
1697	C02DB02	hydralazine	Agents acting on arterial smooth muscle	motor control or execution	1.16 (0.6-2.03) [12]	[4]	NA
1698	C02DB02	hydralazine	Agents acting on arterial smooth muscle	phonatory	0.92 (0.6-1.36) [26]	[5]	NA
1699	C02DB02	hydralazine	Agents acting on arterial smooth muscle	prosody	[0]	[0]	NA
1700	C02DB02	hydralazine	Agents acting on arterial smooth muscle	reasoning abnormal	[0]	[0]	NA
1701	C02DB02	hydralazine	Agents acting on arterial smooth muscle	stereotypies	[0]	[0]	NA
1702	C02DC01	minoxidil	Agents acting on arterial smooth muscle	aphasia	[3]	[1]	NA
1703	C02DC01	minoxidil	Agents acting on arterial smooth muscle	high productivity speech or thought	[0]	[0]	NA
1704	C02DC01	minoxidil	Agents acting on arterial smooth muscle	incoherence	[7]	[0]	NA
1705	C02DC01	minoxidil	Agents acting on arterial smooth muscle	low productivity speech or thought	[2]	[0]	NA
1706	C02DC01	minoxidil	Agents acting on arterial smooth muscle	motor control or execution	[7]	[1]	NA
1707	C02DC01	minoxidil	Agents acting on arterial smooth muscle	phonatory	[7]	[1]	NA
1708	C02DC01	minoxidil	Agents acting on arterial smooth muscle	prosody	[0]	[0]	NA
1709	C02DC01	minoxidil	Agents acting on arterial smooth muscle	reasoning abnormal	[0]	[0]	NA
1710	C02DC01	minoxidil	Agents acting on arterial smooth muscle	stereotypies	[0]	[0]	NA
1711	C02KX01	bosentan	Other antihypertensives	aphasia	0.68 (0.47-0.95) [35]	NA	NA
1712	C02KX01	bosentan	Other antihypertensives	high productivity speech or thought	[0]	NA	NA
1713	C02KX01	bosentan	Other antihypertensives	incoherence	0.48 (0.27-0.8) [15]	NA	NA
1714	C02KX01	bosentan	Other antihypertensives	low productivity speech or thought	[1]	NA	NA
1715	C02KX01	bosentan	Other antihypertensives	motor control or execution	0.58 (0.39-0.82) [32]	NA	NA
1716	C02KX01	bosentan	Other antihypertensives	phonatory	0.57 (0.46-0.71) [86]	NA	NA
1717	C02KX01	bosentan	Other antihypertensives	prosody	[0]	NA	NA
1718	C02KX01	bosentan	Other antihypertensives	reasoning abnormal	[0]	NA	NA
1719	C02KX01	bosentan	Other antihypertensives	stereotypies	[0]	NA	NA
1720	C02KX02	ambrisentan	Other antihypertensives	aphasia	0.24 (0.16-0.34) [28]	NA	NA
1721	C02KX02	ambrisentan	Other antihypertensives	high productivity speech or thought	[3]	NA	NA
1722	C02KX02	ambrisentan	Other antihypertensives	incoherence	0.59 (0.42-0.8) [41]	NA	NA
1723	C02KX02	ambrisentan	Other antihypertensives	low productivity speech or thought	[3]	NA	NA
1724	C02KX02	ambrisentan	Other antihypertensives	motor control or execution	0.39 (0.29-0.52) [49]	NA	NA
1725	C02KX02	ambrisentan	Other antihypertensives	phonatory	0.81 (0.72-0.92) [275]	NA	NA
1726	C02KX02	ambrisentan	Other antihypertensives	prosody	[0]	NA	NA
1727	C02KX02	ambrisentan	Other antihypertensives	reasoning abnormal	[0]	NA	NA
1728	C02KX02	ambrisentan	Other antihypertensives	stereotypies	[0]	NA	NA
1729	C02KX04	macitentan	Other antihypertensives	aphasia	0.66 (0.44-0.94) [30]	NA	NA
1730	C02KX04	macitentan	Other antihypertensives	high productivity speech or thought	[1]	NA	NA
1731	C02KX04	macitentan	Other antihypertensives	incoherence	1.1 (0.74-1.57) [30]	NA	NA
1732	C02KX04	macitentan	Other antihypertensives	low productivity speech or thought	[3]	NA	NA
1733	C02KX04	macitentan	Other antihypertensives	motor control or execution	0.59 (0.39-0.85) [29]	NA	NA
1734	C02KX04	macitentan	Other antihypertensives	phonatory	1.25 (1.06-1.45) [165]	NA	NA
1735	C02KX04	macitentan	Other antihypertensives	prosody	[0]	NA	NA
1736	C02KX04	macitentan	Other antihypertensives	reasoning abnormal	[0]	NA	NA
1737	C02KX04	macitentan	Other antihypertensives	stereotypies	[0]	NA	NA
1738	C02KX05	riociguat	Other antihypertensives	aphasia	0.82 (0.49-1.29) [19]	NA	NA
1739	C02KX05	riociguat	Other antihypertensives	high productivity speech or thought	[0]	NA	NA
1740	C02KX05	riociguat	Other antihypertensives	incoherence	1.16 (0.66-1.89) [16]	NA	NA
1741	C02KX05	riociguat	Other antihypertensives	low productivity speech or thought	[2]	NA	NA
1742	C02KX05	riociguat	Other antihypertensives	motor control or execution	0.73 (0.43-1.15) [18]	NA	NA
1743	C02KX05	riociguat	Other antihypertensives	phonatory	1.24 (0.98-1.54) [83]	NA	NA
1744	C02KX05	riociguat	Other antihypertensives	prosody	[0]	NA	NA
1745	C02KX05	riociguat	Other antihypertensives	reasoning abnormal	[0]	NA	NA
1746	C02KX05	riociguat	Other antihypertensives	stereotypies	[0]	NA	NA
1747	C03AA01	bendroflumethiazide	Thiazides	aphasia	[6]	[6]	NA
1748	C03AA01	bendroflumethiazide	Thiazides	high productivity speech or thought	[2]	[2]	NA
1749	C03AA01	bendroflumethiazide	Thiazides	incoherence	[3]	[2]	NA
1750	C03AA01	bendroflumethiazide	Thiazides	low productivity speech or thought	[1]	[1]	NA
1751	C03AA01	bendroflumethiazide	Thiazides	motor control or execution	3.13 (1.79-5.1) [16]	2.75 (1.36-4.98) [11]	NA
1752	C03AA01	bendroflumethiazide	Thiazides	phonatory	1.15 (0.65-1.87) [16]	[2]	NA
1753	C03AA01	bendroflumethiazide	Thiazides	prosody	[0]	[0]	NA
1754	C03AA01	bendroflumethiazide	Thiazides	reasoning abnormal	[0]	[0]	NA
1755	C03AA01	bendroflumethiazide	Thiazides	stereotypies	[0]	[0]	NA
1756	C03AA03	hydrochlorothiazide	Thiazides	aphasia	1.48 (1.28-1.7) [203]*	1.24 (0.94-1.61) [60]	[0]
1757	C03AA03	hydrochlorothiazide	Thiazides	high productivity speech or thought	[9]	0.78 (0.56-1.05) [44]	2.32 (1.1-4.33) [10]
1758	C03AA03	hydrochlorothiazide	Thiazides	incoherence	0.9 (0.71-1.13) [75]	0.68 (0.53-0.87) [70]	1.28 (0.71-2.14) [15]
1759	C03AA03	hydrochlorothiazide	Thiazides	low productivity speech or thought	1.29 (0.83-1.91) [25]	1.03 (0.67-1.53) [26]	[1]
1760	C03AA03	hydrochlorothiazide	Thiazides	motor control or execution	1.5 (1.31-1.72) [221]*	1.13 (0.92-1.37) [111]	1.04 (0.59-1.7) [16]
1761	C03AA03	hydrochlorothiazide	Thiazides	phonatory	1.65 (1.52-1.78) [657]*	1.74 (1.37-2.19) [82]	[2]
1762	C03AA03	hydrochlorothiazide	Thiazides	prosody	[0]	[0]	[0]
1763	C03AA03	hydrochlorothiazide	Thiazides	reasoning abnormal	[2]	[1]	[1]
1764	C03AA03	hydrochlorothiazide	Thiazides	stereotypies	[1]	[7]	[0]
1765	C03AA06	trichlormethiazide	Thiazides	aphasia	[3]	NA	NA
1766	C03AA06	trichlormethiazide	Thiazides	high productivity speech or thought	[0]	NA	NA
1767	C03AA06	trichlormethiazide	Thiazides	incoherence	[0]	NA	NA
1768	C03AA06	trichlormethiazide	Thiazides	low productivity speech or thought	[0]	NA	NA
1769	C03AA06	trichlormethiazide	Thiazides	motor control or execution	[5]	NA	NA
1770	C03AA06	trichlormethiazide	Thiazides	phonatory	[5]	NA	NA
1771	C03AA06	trichlormethiazide	Thiazides	prosody	[0]	NA	NA
1772	C03AA06	trichlormethiazide	Thiazides	reasoning abnormal	[0]	NA	NA
1773	C03AA06	trichlormethiazide	Thiazides	stereotypies	[0]	NA	NA
1774	C03BA04	chlortalidone	Other low-ceiling diuretics	aphasia	[8]	[2]	NA
1775	C03BA04	chlortalidone	Other low-ceiling diuretics	high productivity speech or thought	[0]	[2]	NA
1776	C03BA04	chlortalidone	Other low-ceiling diuretics	incoherence	[2]	[2]	NA
1777	C03BA04	chlortalidone	Other low-ceiling diuretics	low productivity speech or thought	[3]	[2]	NA
1778	C03BA04	chlortalidone	Other low-ceiling diuretics	motor control or execution	[6]	[3]	NA
1779	C03BA04	chlortalidone	Other low-ceiling diuretics	phonatory	1 (0.59-1.58) [18]	[7]	NA
1780	C03BA04	chlortalidone	Other low-ceiling diuretics	prosody	[0]	[0]	NA
1781	C03BA04	chlortalidone	Other low-ceiling diuretics	reasoning abnormal	[0]	[0]	NA
1782	C03BA04	chlortalidone	Other low-ceiling diuretics	stereotypies	[0]	[0]	NA
1783	C03BA08	metolazone	Other low-ceiling diuretics	aphasia	[0]	NA	NA
1784	C03BA08	metolazone	Other low-ceiling diuretics	high productivity speech or thought	[1]	NA	NA
1785	C03BA08	metolazone	Other low-ceiling diuretics	incoherence	[6]	NA	NA
1786	C03BA08	metolazone	Other low-ceiling diuretics	low productivity speech or thought	[3]	NA	NA
1787	C03BA08	metolazone	Other low-ceiling diuretics	motor control or execution	[4]	NA	NA
1788	C03BA08	metolazone	Other low-ceiling diuretics	phonatory	[7]	NA	NA
1789	C03BA08	metolazone	Other low-ceiling diuretics	prosody	[0]	NA	NA
1790	C03BA08	metolazone	Other low-ceiling diuretics	reasoning abnormal	[0]	NA	NA
1791	C03BA08	metolazone	Other low-ceiling diuretics	stereotypies	[0]	NA	NA
1792	C03BA11	indapamide	Other low-ceiling diuretics	aphasia	1.95 (1.17-3.05) [19]	[6]	NA
1793	C03BA11	indapamide	Other low-ceiling diuretics	high productivity speech or thought	[1]	[1]	NA
1794	C03BA11	indapamide	Other low-ceiling diuretics	incoherence	[5]	[4]	NA
1795	C03BA11	indapamide	Other low-ceiling diuretics	low productivity speech or thought	[0]	[1]	NA
1796	C03BA11	indapamide	Other low-ceiling diuretics	motor control or execution	2.68 (1.78-3.88) [28]	[6]	NA
1797	C03BA11	indapamide	Other low-ceiling diuretics	phonatory	1.16 (0.79-1.63) [33]	[7]	NA
1798	C03BA11	indapamide	Other low-ceiling diuretics	prosody	[0]	[0]	NA
1799	C03BA11	indapamide	Other low-ceiling diuretics	reasoning abnormal	[0]	[0]	NA
1800	C03BA11	indapamide	Other low-ceiling diuretics	stereotypies	[1]	[1]	NA
1801	C03CA01	furosemide	High-ceiling diuretics	aphasia	1.28 (1.09-1.49) [166]	1 (0.72-1.36) [44]	[4]
1802	C03CA01	furosemide	High-ceiling diuretics	high productivity speech or thought	1.24 (0.7-2.02) [16]	0.45 (0.28-0.67) [23]	[7]
1803	C03CA01	furosemide	High-ceiling diuretics	incoherence	0.92 (0.72-1.16) [72]	0.59 (0.44-0.77) [54]	[7]
1804	C03CA01	furosemide	High-ceiling diuretics	low productivity speech or thought	1.54 (1.02-2.23) [28]	1.39 (0.94-2.01) [31]	[2]
1805	C03CA01	furosemide	High-ceiling diuretics	motor control or execution	1.43 (1.23-1.64) [198]	0.71 (0.54-0.91) [64]	1.03 (0.62-1.61) [20]
1806	C03CA01	furosemide	High-ceiling diuretics	phonatory	1.17 (1.06-1.29) [444]	1.4 (1.06-1.82) [60]	[7]
1807	C03CA01	furosemide	High-ceiling diuretics	prosody	[0]	[0]	[0]
1808	C03CA01	furosemide	High-ceiling diuretics	reasoning abnormal	[1]	[1]	[0]
1809	C03CA01	furosemide	High-ceiling diuretics	stereotypies	[6]	[3]	[0]
1810	C03CA02	bumetanide	High-ceiling diuretics	aphasia	[5]	[4]	NA
1811	C03CA02	bumetanide	High-ceiling diuretics	high productivity speech or thought	[2]	[1]	NA
1812	C03CA02	bumetanide	High-ceiling diuretics	incoherence	[5]	[1]	NA
1813	C03CA02	bumetanide	High-ceiling diuretics	low productivity speech or thought	[1]	[1]	NA
1814	C03CA02	bumetanide	High-ceiling diuretics	motor control or execution	[6]	[4]	NA
1815	C03CA02	bumetanide	High-ceiling diuretics	phonatory	1.28 (0.82-1.89) [25]	[2]	NA
1816	C03CA02	bumetanide	High-ceiling diuretics	prosody	[0]	[0]	NA
1817	C03CA02	bumetanide	High-ceiling diuretics	reasoning abnormal	[0]	[1]	NA
1818	C03CA02	bumetanide	High-ceiling diuretics	stereotypies	[0]	[0]	NA
1819	C03CA04	torasemide	High-ceiling diuretics	aphasia	1.99 (1.33-2.86) [29]	[9]	NA
1820	C03CA04	torasemide	High-ceiling diuretics	high productivity speech or thought	[0]	[1]	NA
1821	C03CA04	torasemide	High-ceiling diuretics	incoherence	[5]	[3]	NA
1822	C03CA04	torasemide	High-ceiling diuretics	low productivity speech or thought	[5]	[0]	NA
1823	C03CA04	torasemide	High-ceiling diuretics	motor control or execution	1.79 (1.18-2.59) [28]	[4]	NA
1824	C03CA04	torasemide	High-ceiling diuretics	phonatory	0.75 (0.51-1.06) [32]	[5]	NA
1825	C03CA04	torasemide	High-ceiling diuretics	prosody	[0]	[0]	NA
1826	C03CA04	torasemide	High-ceiling diuretics	reasoning abnormal	[0]	[0]	NA
1827	C03CA04	torasemide	High-ceiling diuretics	stereotypies	[0]	[0]	NA
1828	C03DA01	spironolactone	Potassium sparing agents	aphasia	1.14 (0.86-1.49) [56]	1.63 (1-2.52) [21]	[2]
1829	C03DA01	spironolactone	Potassium sparing agents	high productivity speech or thought	2.06 (0.98-3.8) [10]	[4]	[1]
1830	C03DA01	spironolactone	Potassium sparing agents	incoherence	1.12 (0.77-1.58) [33]	0.67 (0.39-1.07) [18]	[0]
1831	C03DA01	spironolactone	Potassium sparing agents	low productivity speech or thought	[8]	[6]	[2]
1832	C03DA01	spironolactone	Potassium sparing agents	motor control or execution	1.54 (1.22-1.92) [81]	0.68 (0.4-1.08) [18]	[3]
1833	C03DA01	spironolactone	Potassium sparing agents	phonatory	1.17 (1-1.36) [167]	1.57 (0.95-2.44) [20]	[0]
1834	C03DA01	spironolactone	Potassium sparing agents	prosody	[0]	[0]	[0]
1835	C03DA01	spironolactone	Potassium sparing agents	reasoning abnormal	[1]	[1]	[0]
1836	C03DA01	spironolactone	Potassium sparing agents	stereotypies	[0]	[1]	[0]
1837	C03DA02	canrenoic acid	Potassium sparing agents	aphasia	[8]	NA	NA
1838	C03DA02	canrenoic acid	Potassium sparing agents	high productivity speech or thought	[0]	NA	NA
1839	C03DA02	canrenoic acid	Potassium sparing agents	incoherence	[0]	NA	NA
1840	C03DA02	canrenoic acid	Potassium sparing agents	low productivity speech or thought	[0]	NA	NA
1841	C03DA02	canrenoic acid	Potassium sparing agents	motor control or execution	[2]	NA	NA
1842	C03DA02	canrenoic acid	Potassium sparing agents	phonatory	[3]	NA	NA
1843	C03DA02	canrenoic acid	Potassium sparing agents	prosody	[0]	NA	NA
1844	C03DA02	canrenoic acid	Potassium sparing agents	reasoning abnormal	[0]	NA	NA
1845	C03DA02	canrenoic acid	Potassium sparing agents	stereotypies	[0]	NA	NA
1846	C03DA04	eplerenone	Potassium sparing agents	aphasia	2.14 (1.02-3.95) [10]	NA	NA
1847	C03DA04	eplerenone	Potassium sparing agents	high productivity speech or thought	[3]	NA	NA
1848	C03DA04	eplerenone	Potassium sparing agents	incoherence	[4]	NA	NA
1849	C03DA04	eplerenone	Potassium sparing agents	low productivity speech or thought	[0]	NA	NA
1850	C03DA04	eplerenone	Potassium sparing agents	motor control or execution	[6]	NA	NA
1851	C03DA04	eplerenone	Potassium sparing agents	phonatory	[3]	NA	NA
1852	C03DA04	eplerenone	Potassium sparing agents	prosody	[0]	NA	NA
1853	C03DA04	eplerenone	Potassium sparing agents	reasoning abnormal	[0]	NA	NA
1854	C03DA04	eplerenone	Potassium sparing agents	stereotypies	[0]	NA	NA
1855	C03DB01	amiloride	Potassium sparing agents	aphasia	3.08 (1.47-5.68) [10]	[2]	NA
1856	C03DB01	amiloride	Potassium sparing agents	high productivity speech or thought	[2]	[0]	NA
1857	C03DB01	amiloride	Potassium sparing agents	incoherence	[3]	[3]	NA
1858	C03DB01	amiloride	Potassium sparing agents	low productivity speech or thought	[0]	[1]	NA
1859	C03DB01	amiloride	Potassium sparing agents	motor control or execution	[9]	[5]	NA
1860	C03DB01	amiloride	Potassium sparing agents	phonatory	[5]	[0]	NA
1861	C03DB01	amiloride	Potassium sparing agents	prosody	[0]	[0]	NA
1862	C03DB01	amiloride	Potassium sparing agents	reasoning abnormal	[0]	[0]	NA
1863	C03DB01	amiloride	Potassium sparing agents	stereotypies	[0]	[0]	NA
1864	C03DB02	triamterene	Potassium sparing agents	aphasia	1.21 (0.66-2.03) [14]	[9]	NA
1865	C03DB02	triamterene	Potassium sparing agents	high productivity speech or thought	[0]	[5]	NA
1866	C03DB02	triamterene	Potassium sparing agents	incoherence	[5]	1.12 (0.61-1.9) [14]	NA
1867	C03DB02	triamterene	Potassium sparing agents	low productivity speech or thought	[1]	[4]	NA
1868	C03DB02	triamterene	Potassium sparing agents	motor control or execution	1.2 (0.67-1.99) [15]	0.81 (0.38-1.5) [10]	NA
1869	C03DB02	triamterene	Potassium sparing agents	phonatory	2.26 (1.78-2.84) [76]*	1.67 (0.79-3.09) [10]	NA
1870	C03DB02	triamterene	Potassium sparing agents	prosody	[0]	[0]	NA
1871	C03DB02	triamterene	Potassium sparing agents	reasoning abnormal	[0]	[0]	NA
1872	C03DB02	triamterene	Potassium sparing agents	stereotypies	[0]	[0]	NA
1873	C03XA01	tolvaptan	Other diuretics	aphasia	[4]	NA	NA
1874	C03XA01	tolvaptan	Other diuretics	high productivity speech or thought	[0]	NA	NA
1875	C03XA01	tolvaptan	Other diuretics	incoherence	[3]	NA	NA
1876	C03XA01	tolvaptan	Other diuretics	low productivity speech or thought	[1]	NA	NA
1877	C03XA01	tolvaptan	Other diuretics	motor control or execution	[5]	NA	NA
1878	C03XA01	tolvaptan	Other diuretics	phonatory	[8]	NA	NA
1879	C03XA01	tolvaptan	Other diuretics	prosody	[0]	NA	NA
1880	C03XA01	tolvaptan	Other diuretics	reasoning abnormal	[0]	NA	NA
1881	C03XA01	tolvaptan	Other diuretics	stereotypies	[0]	NA	NA
1882	C04AC01	nicotinic acid	Peripheral vasodilators	aphasia	0.37 (0.19-0.64) [12]	[6]	[0]
1883	C04AC01	nicotinic acid	Peripheral vasodilators	high productivity speech or thought	[0]	[2]	[0]
1884	C04AC01	nicotinic acid	Peripheral vasodilators	incoherence	[9]	[6]	[7]
1885	C04AC01	nicotinic acid	Peripheral vasodilators	low productivity speech or thought	[1]	[2]	[0]
1886	C04AC01	nicotinic acid	Peripheral vasodilators	motor control or execution	0.43 (0.24-0.71) [15]	0.93 (0.44-1.71) [10]	[3]
1887	C04AC01	nicotinic acid	Peripheral vasodilators	phonatory	0.53 (0.4-0.71) [51]	[3]	[0]
1888	C04AC01	nicotinic acid	Peripheral vasodilators	prosody	[0]	[0]	[0]
1889	C04AC01	nicotinic acid	Peripheral vasodilators	reasoning abnormal	[0]	[0]	[0]
1890	C04AC01	nicotinic acid	Peripheral vasodilators	stereotypies	[0]	[0]	[0]
1891	C04AD03	pentoxifylline	Peripheral vasodilators	aphasia	[8]	NA	NA
1892	C04AD03	pentoxifylline	Peripheral vasodilators	high productivity speech or thought	[0]	NA	NA
1893	C04AD03	pentoxifylline	Peripheral vasodilators	incoherence	[1]	NA	NA
1894	C04AD03	pentoxifylline	Peripheral vasodilators	low productivity speech or thought	[0]	NA	NA
1895	C04AD03	pentoxifylline	Peripheral vasodilators	motor control or execution	[1]	NA	NA
1896	C04AD03	pentoxifylline	Peripheral vasodilators	phonatory	[4]	NA	NA
1897	C04AD03	pentoxifylline	Peripheral vasodilators	prosody	[0]	NA	NA
1898	C04AD03	pentoxifylline	Peripheral vasodilators	reasoning abnormal	[0]	NA	NA
1899	C04AD03	pentoxifylline	Peripheral vasodilators	stereotypies	[0]	NA	NA
1900	C05AA06	fluorometholone	Antihemorroids	aphasia	[1]	NA	NA
1901	C05AA06	fluorometholone	Antihemorroids	high productivity speech or thought	[0]	NA	NA
1902	C05AA06	fluorometholone	Antihemorroids	incoherence	[0]	NA	NA
1903	C05AA06	fluorometholone	Antihemorroids	low productivity speech or thought	[0]	NA	NA
1904	C05AA06	fluorometholone	Antihemorroids	motor control or execution	[1]	NA	NA
1905	C05AA06	fluorometholone	Antihemorroids	phonatory	[7]	NA	NA
1906	C05AA06	fluorometholone	Antihemorroids	prosody	[0]	NA	NA
1907	C05AA06	fluorometholone	Antihemorroids	reasoning abnormal	[0]	NA	NA
1908	C05AA06	fluorometholone	Antihemorroids	stereotypies	[0]	NA	NA
1909	C05AE03	diltiazem	Antihemorroids	aphasia	0.9 (0.62-1.26) [34]	[7]	NA
1910	C05AE03	diltiazem	Antihemorroids	high productivity speech or thought	[2]	[6]	NA
1911	C05AE03	diltiazem	Antihemorroids	incoherence	1.28 (0.85-1.84) [29]	0.54 (0.26-0.97) [11]	NA
1912	C05AE03	diltiazem	Antihemorroids	low productivity speech or thought	[4]	[2]	NA
1913	C05AE03	diltiazem	Antihemorroids	motor control or execution	1.31 (0.98-1.71) [53]	1.46 (0.97-2.11) [29]	NA
1914	C05AE03	diltiazem	Antihemorroids	phonatory	1.87 (1.62-2.15) [205]*	2.82 (1.84-4.14) [27]	NA
1915	C05AE03	diltiazem	Antihemorroids	prosody	[0]	[0]	NA
1916	C05AE03	diltiazem	Antihemorroids	reasoning abnormal	[0]	[0]	NA
1917	C05AE03	diltiazem	Antihemorroids	stereotypies	[0]	[1]	NA
1918	C05BA03	heparin	Antivaricose	aphasia	2.19 (1.67-2.82) [61]*	[6]	NA
1919	C05BA03	heparin	Antivaricose	high productivity speech or thought	[4]	[0]	NA
1920	C05BA03	heparin	Antivaricose	incoherence	0.71 (0.36-1.24) [12]	[2]	NA
1921	C05BA03	heparin	Antivaricose	low productivity speech or thought	[0]	[1]	NA
1922	C05BA03	heparin	Antivaricose	motor control or execution	0.93 (0.61-1.35) [28]	[4]	NA
1923	C05BA03	heparin	Antivaricose	phonatory	0.39 (0.26-0.55) [32]	[1]	NA
1924	C05BA03	heparin	Antivaricose	prosody	[0]	[0]	NA
1925	C05BA03	heparin	Antivaricose	reasoning abnormal	[0]	[0]	NA
1926	C05BA03	heparin	Antivaricose	stereotypies	[1]	[0]	NA
1927	C05BB02	polidocanol	Antivaricose	aphasia	[5]	NA	NA
1928	C05BB02	polidocanol	Antivaricose	high productivity speech or thought	[0]	NA	NA
1929	C05BB02	polidocanol	Antivaricose	incoherence	[1]	NA	NA
1930	C05BB02	polidocanol	Antivaricose	low productivity speech or thought	[0]	NA	NA
1931	C05BB02	polidocanol	Antivaricose	motor control or execution	[3]	NA	NA
1932	C05BB02	polidocanol	Antivaricose	phonatory	[1]	NA	NA
1933	C05BB02	polidocanol	Antivaricose	prosody	[0]	NA	NA
1934	C05BB02	polidocanol	Antivaricose	reasoning abnormal	[0]	NA	NA
1935	C05BB02	polidocanol	Antivaricose	stereotypies	[0]	NA	NA
1936	C05CA03	diosmin	Capillary stabilizing agents	aphasia	[3]	NA	NA
1937	C05CA03	diosmin	Capillary stabilizing agents	high productivity speech or thought	[0]	NA	NA
1938	C05CA03	diosmin	Capillary stabilizing agents	incoherence	[1]	NA	NA
1939	C05CA03	diosmin	Capillary stabilizing agents	low productivity speech or thought	[1]	NA	NA
1940	C05CA03	diosmin	Capillary stabilizing agents	motor control or execution	[2]	NA	NA
1941	C05CA03	diosmin	Capillary stabilizing agents	phonatory	[8]	NA	NA
1942	C05CA03	diosmin	Capillary stabilizing agents	prosody	[0]	NA	NA
1943	C05CA03	diosmin	Capillary stabilizing agents	reasoning abnormal	[0]	NA	NA
1944	C05CA03	diosmin	Capillary stabilizing agents	stereotypies	[0]	NA	NA
1945	C07AA05	propranolol	Beta blockers	aphasia	0.58 (0.29-1.04) [11]	2.23 (1.54-3.13) [35]	[5]
1946	C07AA05	propranolol	Beta blockers	high productivity speech or thought	[6]	0.87 (0.49-1.42) [16]	[6]
1947	C07AA05	propranolol	Beta blockers	incoherence	1.58 (0.94-2.51) [18]	1.6 (1.19-2.12) [52]	0.99 (0.49-1.79) [11]
1948	C07AA05	propranolol	Beta blockers	low productivity speech or thought	[2]	[4]	[5]
1949	C07AA05	propranolol	Beta blockers	motor control or execution	1.48 (0.99-2.11) [30]	1.37 (0.99-1.85) [44]	1.39 (0.84-2.17) [20]
1950	C07AA05	propranolol	Beta blockers	phonatory	1.01 (0.76-1.32) [56]	1.26 (0.77-1.96) [20]	4.2 (1.98-7.91) [10]
1951	C07AA05	propranolol	Beta blockers	prosody	[0]	[2]	[0]
1952	C07AA05	propranolol	Beta blockers	reasoning abnormal	[1]	[4]	[2]
1953	C07AA05	propranolol	Beta blockers	stereotypies	[1]	[2]	[1]
1954	C07AA06	timolol	Beta blockers	aphasia	0.51 (0.25-0.92) [11]	[2]	NA
1955	C07AA06	timolol	Beta blockers	high productivity speech or thought	[3]	[1]	NA
1956	C07AA06	timolol	Beta blockers	incoherence	1.01 (0.53-1.73) [13]	[5]	NA
1957	C07AA06	timolol	Beta blockers	low productivity speech or thought	[1]	[0]	NA
1958	C07AA06	timolol	Beta blockers	motor control or execution	0.43 (0.2-0.8) [10]	[2]	NA
1959	C07AA06	timolol	Beta blockers	phonatory	0.99 (0.76-1.27) [62]	[3]	NA
1960	C07AA06	timolol	Beta blockers	prosody	[0]	[0]	NA
1961	C07AA06	timolol	Beta blockers	reasoning abnormal	[0]	[0]	NA
1962	C07AA06	timolol	Beta blockers	stereotypies	[0]	[0]	NA
1963	C07AA07	sotalol	Beta blockers	aphasia	1.35 (0.69-2.36) [12]	[2]	NA
1964	C07AA07	sotalol	Beta blockers	high productivity speech or thought	[0]	[4]	NA
1965	C07AA07	sotalol	Beta blockers	incoherence	[8]	[1]	NA
1966	C07AA07	sotalol	Beta blockers	low productivity speech or thought	[1]	[1]	NA
1967	C07AA07	sotalol	Beta blockers	motor control or execution	1.57 (0.87-2.59) [15]	[2]	NA
1968	C07AA07	sotalol	Beta blockers	phonatory	1 (0.65-1.47) [26]	[2]	NA
1969	C07AA07	sotalol	Beta blockers	prosody	[0]	[0]	NA
1970	C07AA07	sotalol	Beta blockers	reasoning abnormal	[0]	[0]	NA
1971	C07AA07	sotalol	Beta blockers	stereotypies	[0]	[0]	NA
1972	C07AA12	nadolol	Beta blockers	aphasia	[3]	[1]	NA
1973	C07AA12	nadolol	Beta blockers	high productivity speech or thought	[2]	[0]	NA
1974	C07AA12	nadolol	Beta blockers	incoherence	[3]	[1]	NA
1975	C07AA12	nadolol	Beta blockers	low productivity speech or thought	[1]	[0]	NA
1976	C07AA12	nadolol	Beta blockers	motor control or execution	[4]	[2]	NA
1977	C07AA12	nadolol	Beta blockers	phonatory	1.17 (0.58-2.09) [11]	[4]	NA
1978	C07AA12	nadolol	Beta blockers	prosody	[0]	[0]	NA
1979	C07AA12	nadolol	Beta blockers	reasoning abnormal	[0]	[0]	NA
1980	C07AA12	nadolol	Beta blockers	stereotypies	[1]	[0]	NA
1981	C07AB02	metoprolol	Beta blockers	aphasia	1.68 (1.46-1.93) [209]*	1.11 (0.81-1.48) [49]	[8]
1982	C07AB02	metoprolol	Beta blockers	high productivity speech or thought	0.87 (0.43-1.57) [11]	0.58 (0.39-0.83) [30]	[5]
1983	C07AB02	metoprolol	Beta blockers	incoherence	1.37 (1.12-1.67) [103]	0.59 (0.44-0.77) [55]	1.25 (0.75-1.97) [19]
1984	C07AB02	metoprolol	Beta blockers	low productivity speech or thought	1.48 (0.96-2.17) [26]	0.87 (0.52-1.36) [20]	[3]
1985	C07AB02	metoprolol	Beta blockers	motor control or execution	1.29 (1.1-1.5) [173]	0.7 (0.54-0.9) [64]	1.1 (0.68-1.68) [22]
1986	C07AB02	metoprolol	Beta blockers	phonatory	1.44 (1.32-1.57) [524]*	1.48 (1.13-1.91) [64]	[5]
1987	C07AB02	metoprolol	Beta blockers	prosody	[0]	[0]	[0]
1988	C07AB02	metoprolol	Beta blockers	reasoning abnormal	[2]	[2]	[0]
1989	C07AB02	metoprolol	Beta blockers	stereotypies	[3]	[1]	[1]
1990	C07AB03	atenolol	Beta blockers	aphasia	1.29 (1-1.63) [70]	1.22 (0.81-1.77) [29]	[2]
1991	C07AB03	atenolol	Beta blockers	high productivity speech or thought	[1]	0.58 (0.33-0.95) [16]	[3]
1992	C07AB03	atenolol	Beta blockers	incoherence	1.04 (0.72-1.46) [34]	0.98 (0.72-1.31) [48]	2.03 (1.19-3.25) [18]
1993	C07AB03	atenolol	Beta blockers	low productivity speech or thought	1.83 (1-3.09) [14]	1.48 (0.87-2.37) [18]	[2]
1994	C07AB03	atenolol	Beta blockers	motor control or execution	1.63 (1.32-2) [95]	1.08 (0.8-1.43) [52]	1.72 (1.04-2.68) [20]
1995	C07AB03	atenolol	Beta blockers	phonatory	1.62 (1.43-1.84) [256]*	2.22 (1.64-2.95) [51]*	[6]
1996	C07AB03	atenolol	Beta blockers	prosody	[0]	[0]	[0]
[truncated: 7,085 more rows]
